# Supplementary material
Source: MDPI journal article supplement (https://www.mdpi.com/2304-6740/8/5/35)
Supplement: s1 [file s1]

# Supplementary Materials: Preparation and DFT Studies of $\kappa^2C,N$ -Hypercoordinated Oxazoline Organotins: Monomer Constructs for Stable Polystannanes

Desiree N. Bender, Alan J. Lough, R. Stephen Wylie, Robert A. Gossage and Daniel A. Foucher \*

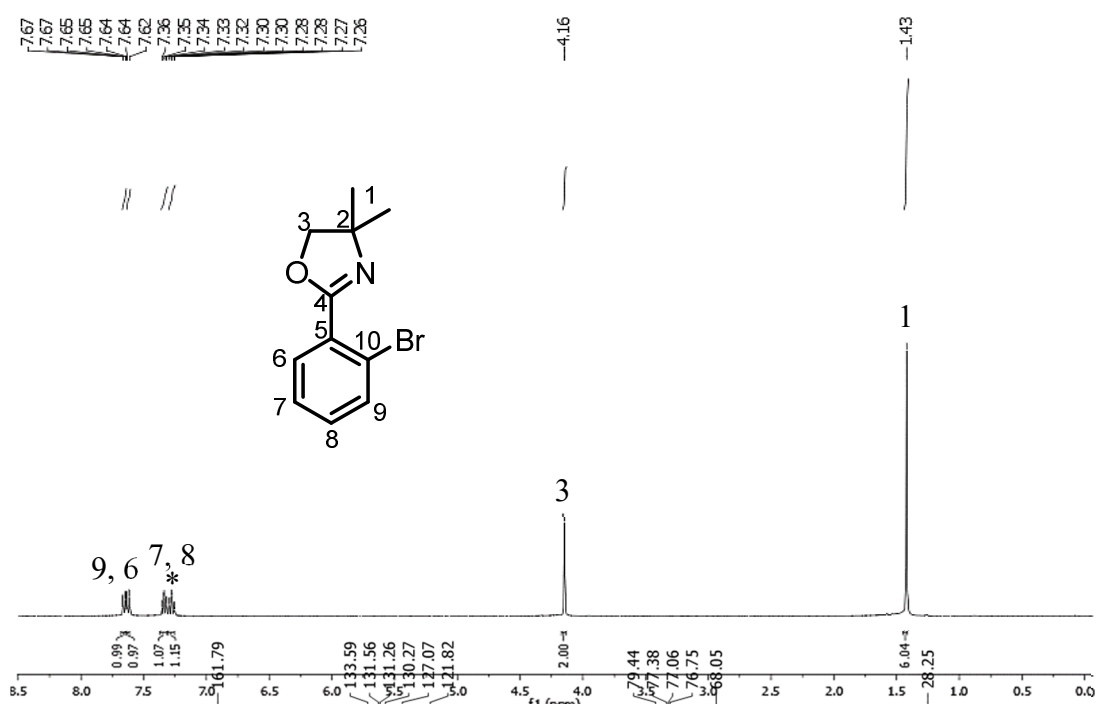

Figure S1: <sup>1</sup>H NMR spectrum of **5** in CDCl<sub>3</sub>\*.

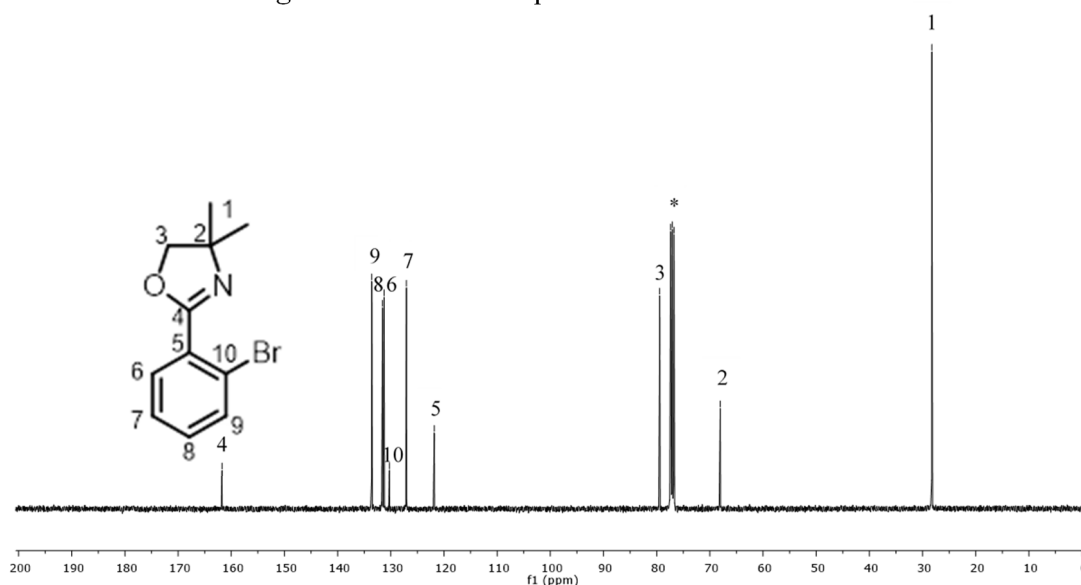

Figure S2: <sup>13</sup>C NMR spectrum of **5** in CDCl<sub>3</sub>\*.

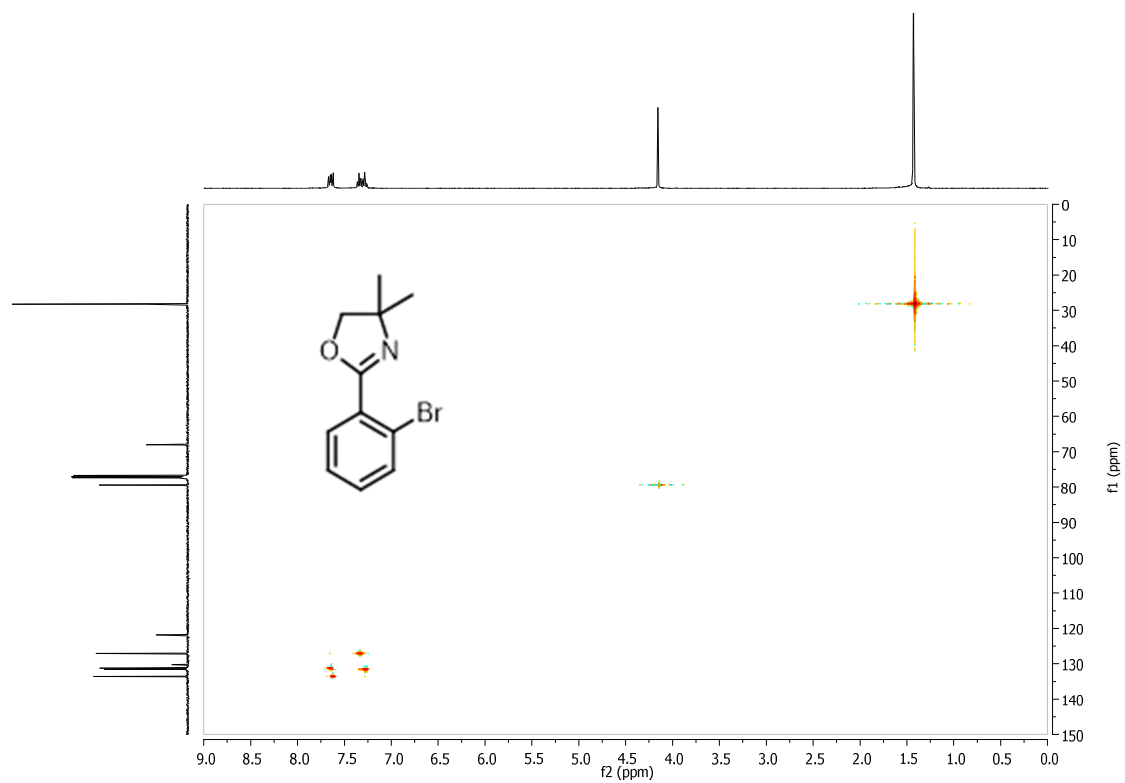

**Figure S3:** HSQC spectrum of **5** in CDCl<sub>3</sub>.

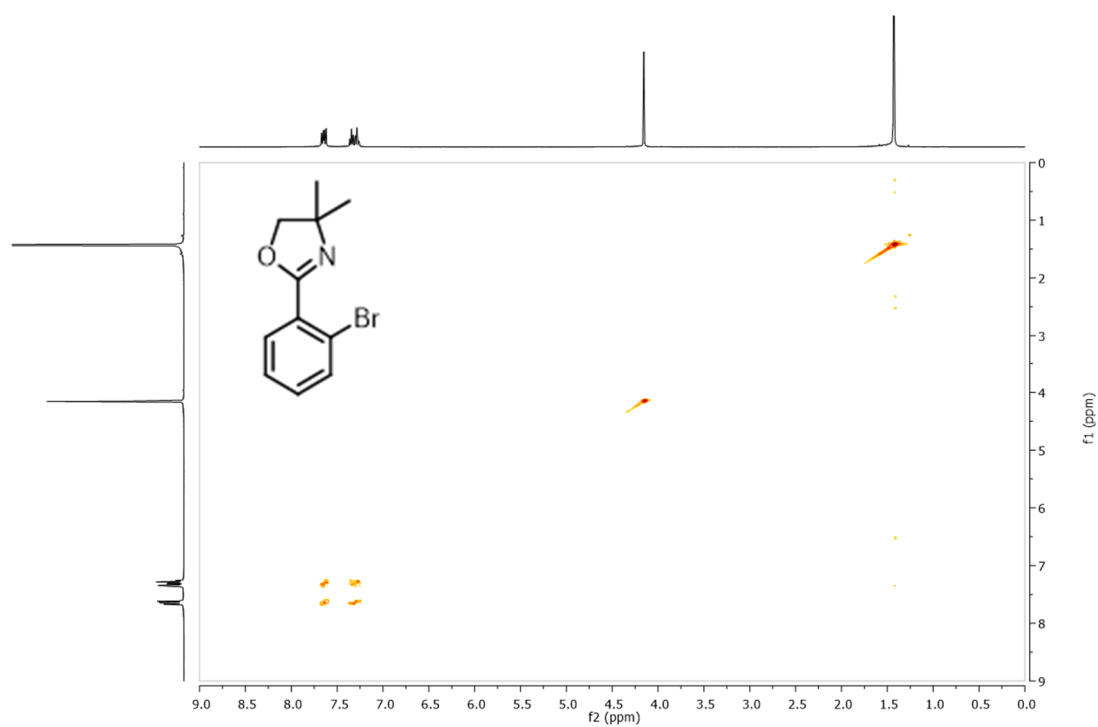

**Figure S4:** COSY spectrum of **5** in CDCl<sub>3</sub>.

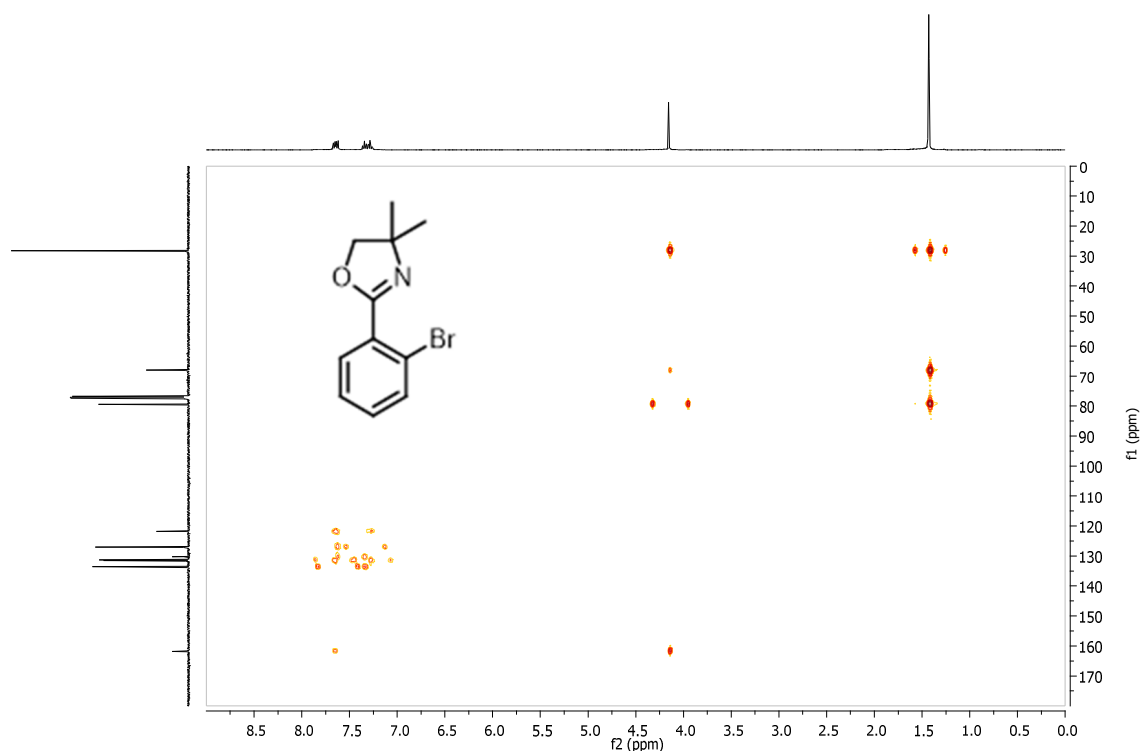

**Figure S5:** HMBC spectrum of **5** in  $\text{CDCl}_3$ .

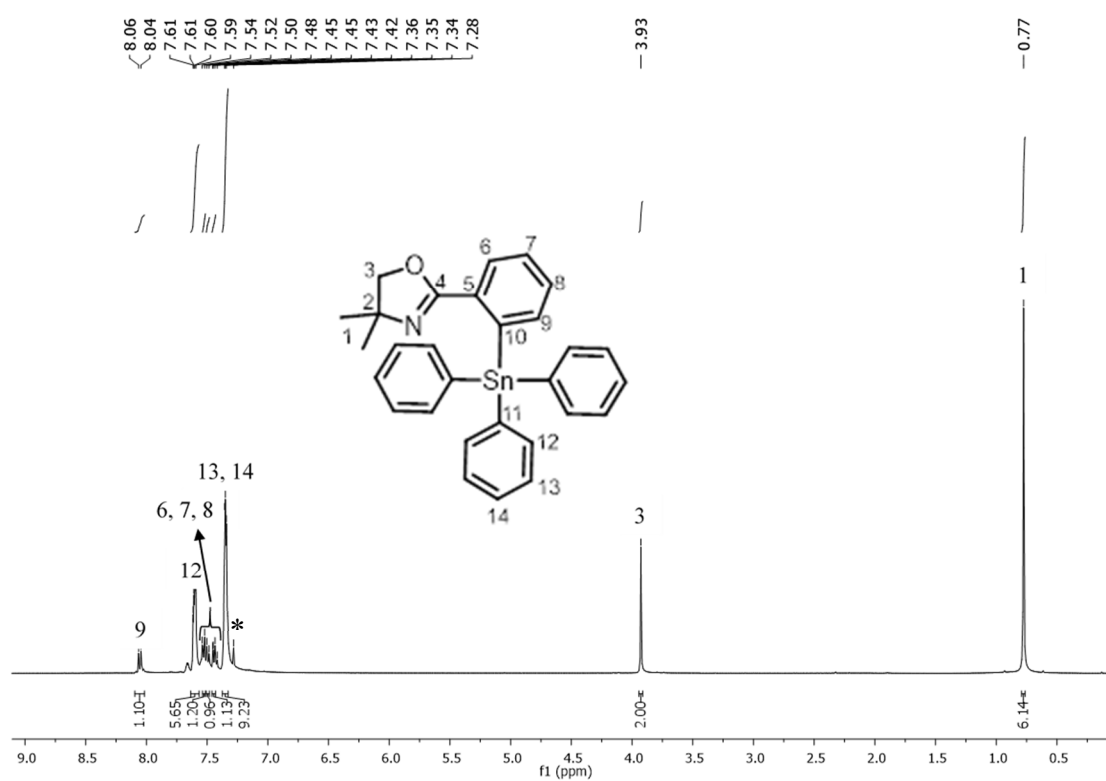

**Figure S6:**  $^1\text{H}$  NMR spectrum of **7** in  $\text{CDCl}_3^*$ .

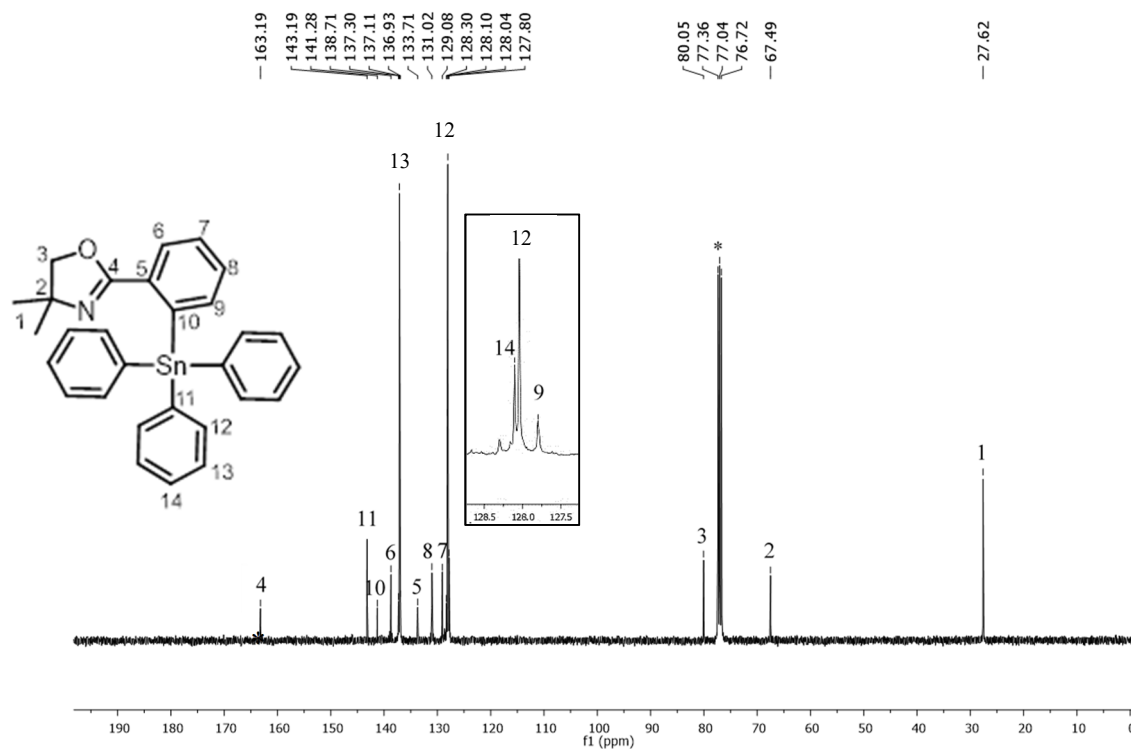

Figure S7:  $^{13}\text{C}$  NMR spectrum of **7** in  $\text{CDCl}_3^*$ .

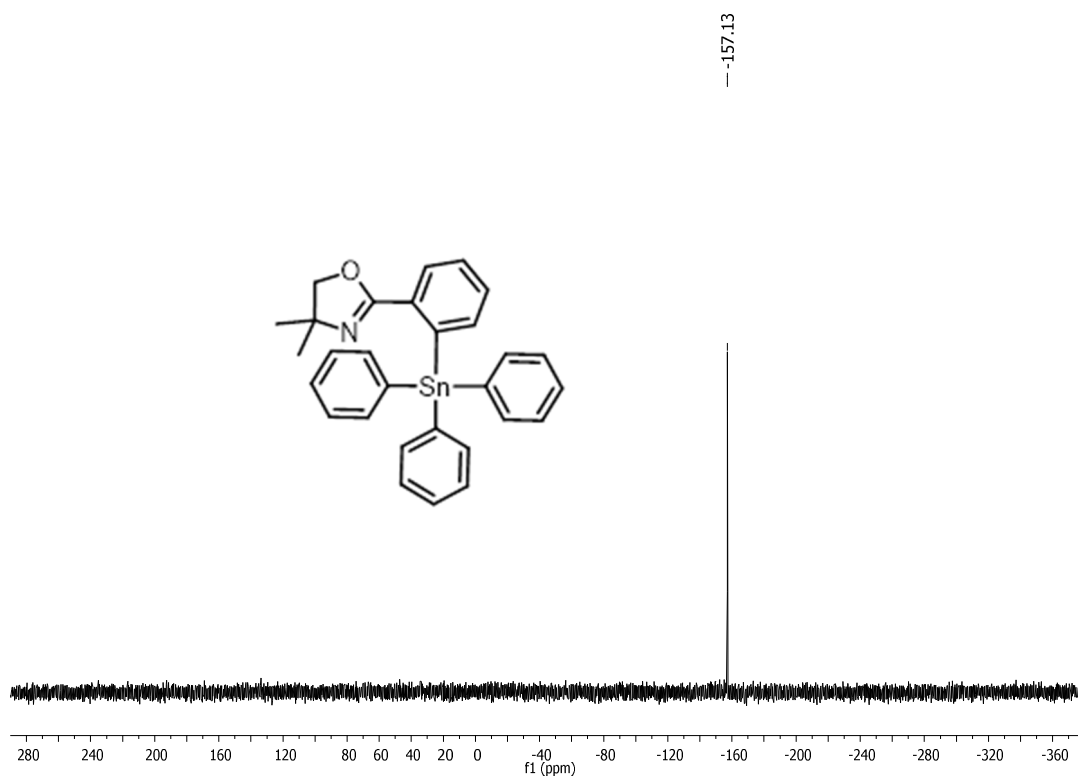

Figure S8:  $^{119}\text{Sn}$  NMR spectrum of **7** in  $\text{CDCl}_3$ .

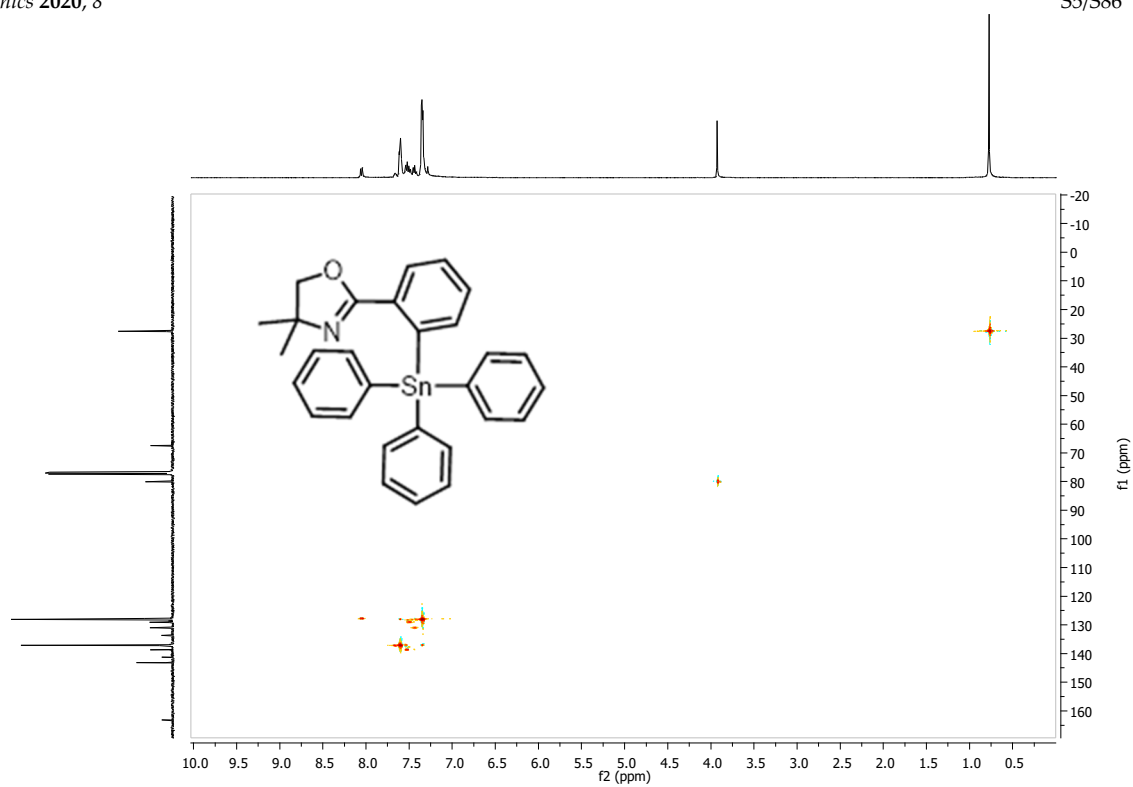

**Figure S9:** HSQC spectrum of **7** in CDCl<sub>3</sub>.

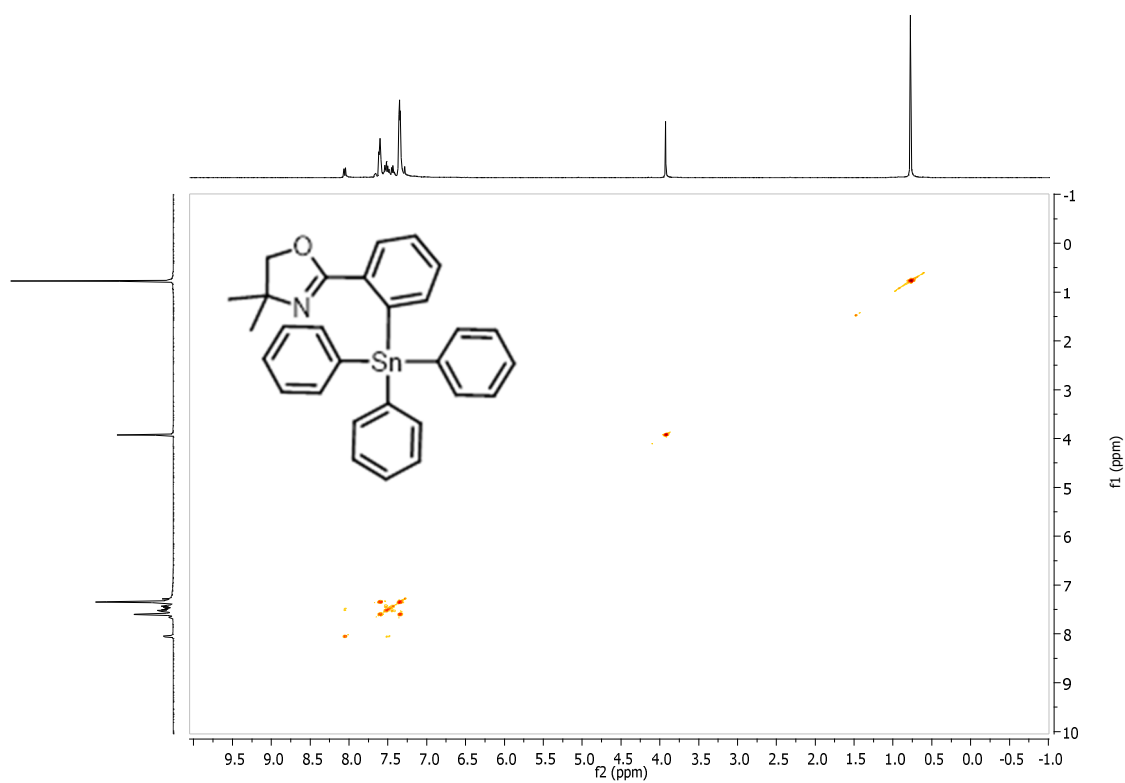

**Figure S10:** COSY spectrum of **7** in CDCl<sub>3</sub>.

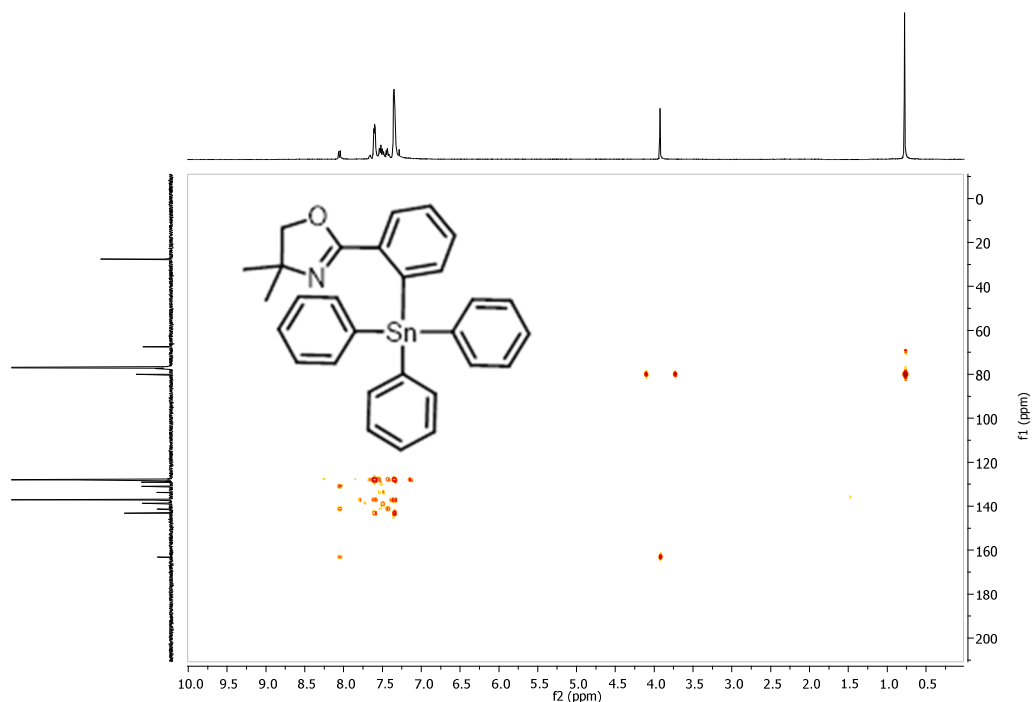Figure S11: HMBC spectrum of **7** in  $\text{CDCl}_3$ .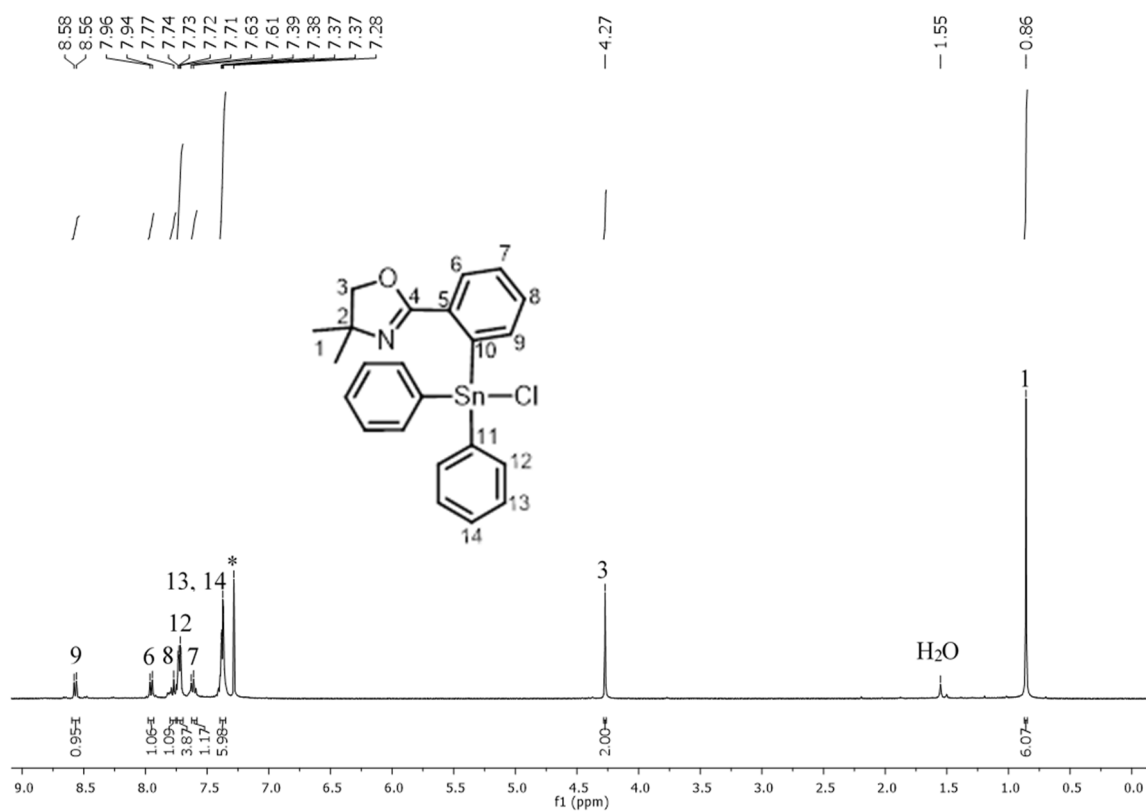Figure S12:  $^1\text{H}$  NMR spectrum of **9** in  $\text{CDCl}_3^*$ .

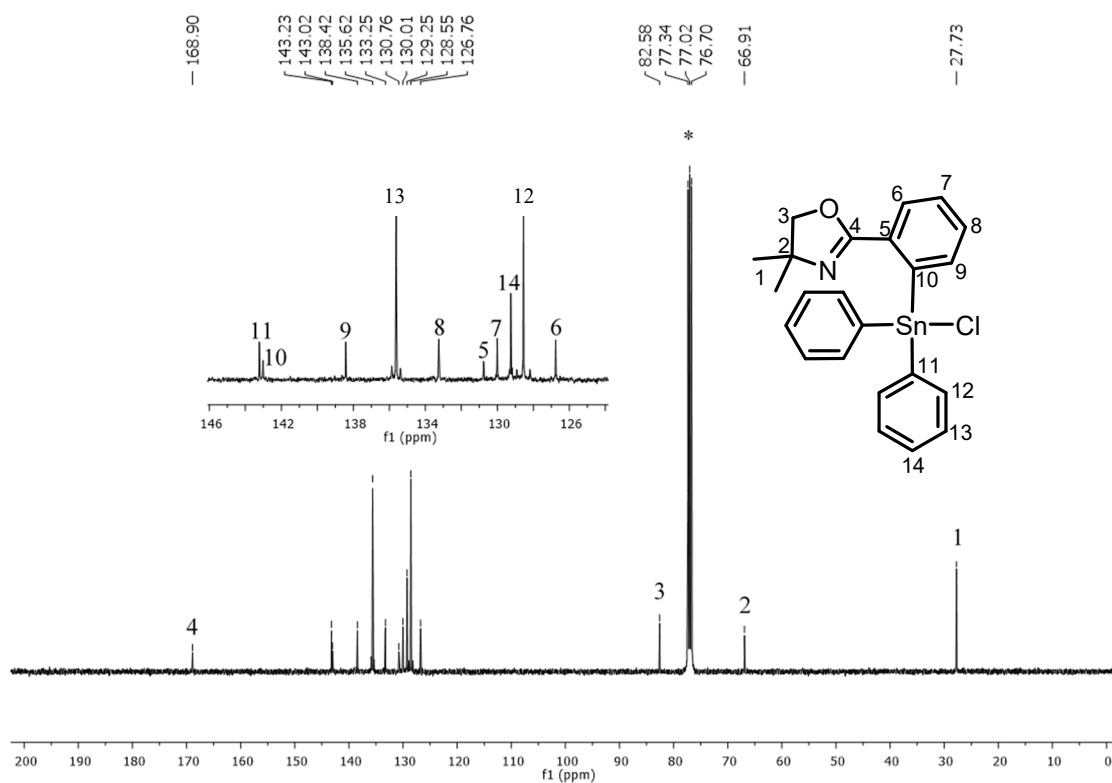

**Figure S13:**  $^{13}\text{C}$  NMR spectrum of **9** in  $\text{CDCl}_3^*$ .

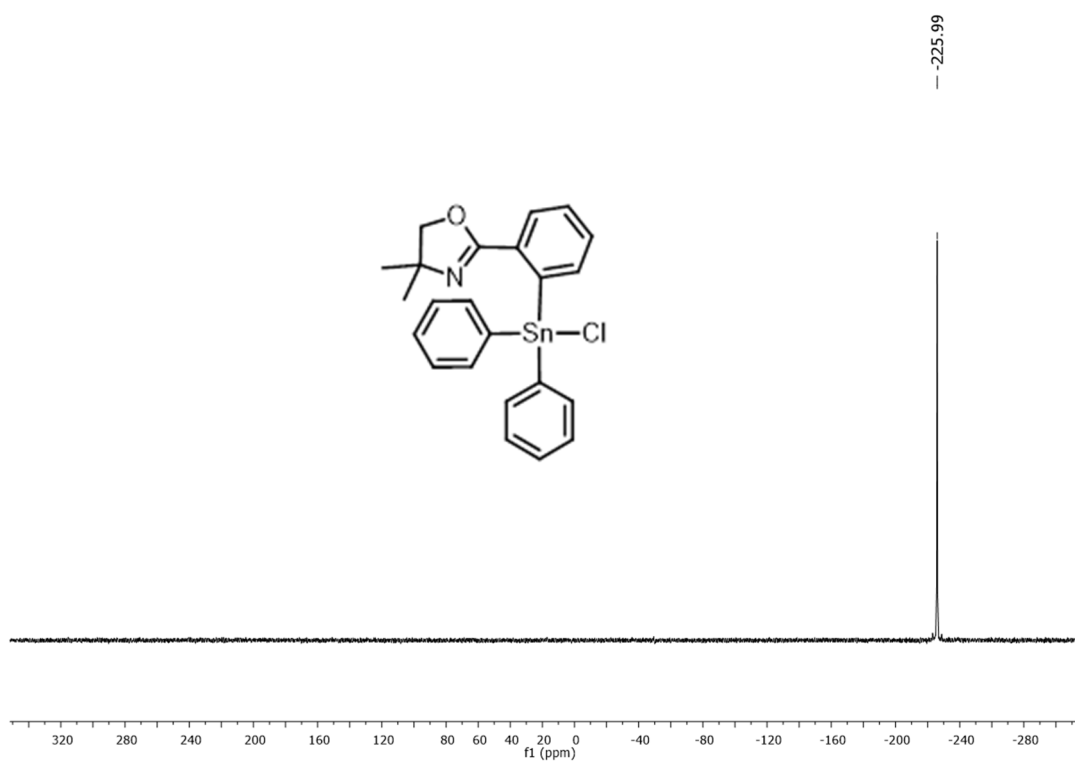

**Figure S14:**  $^{119}\text{Sn}$  NMR spectrum of **9** in  $\text{CDCl}_3$ .

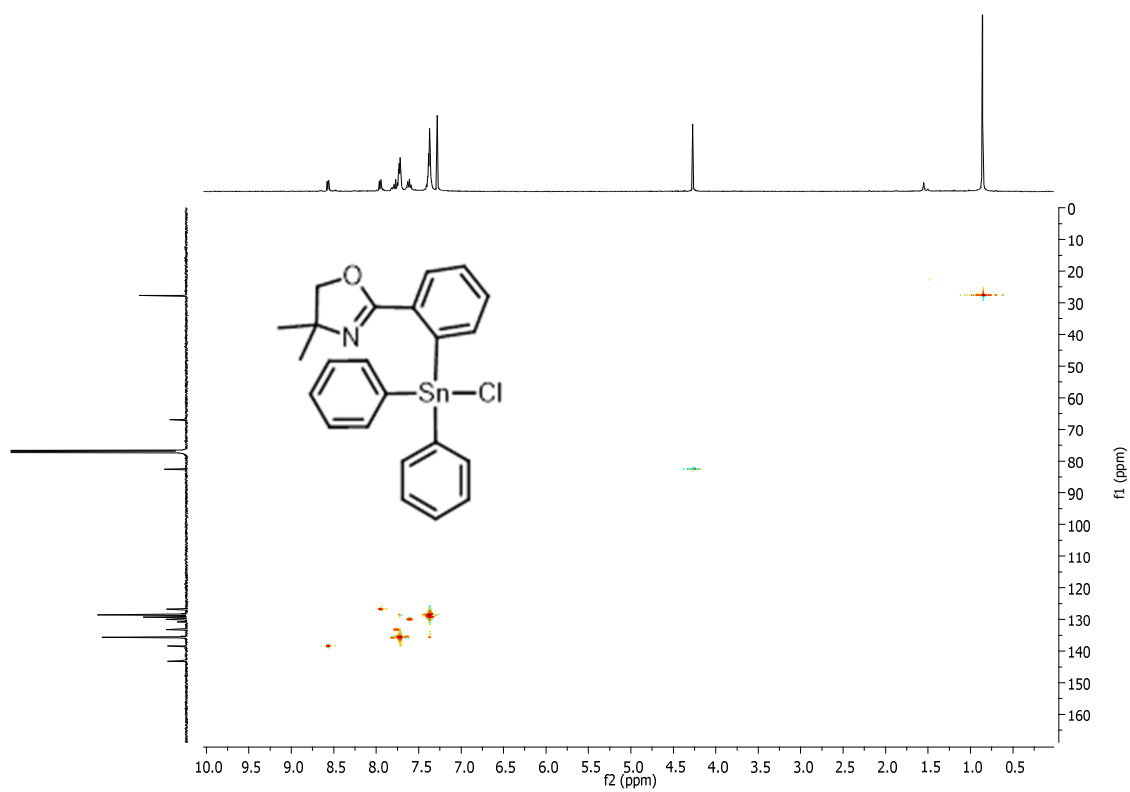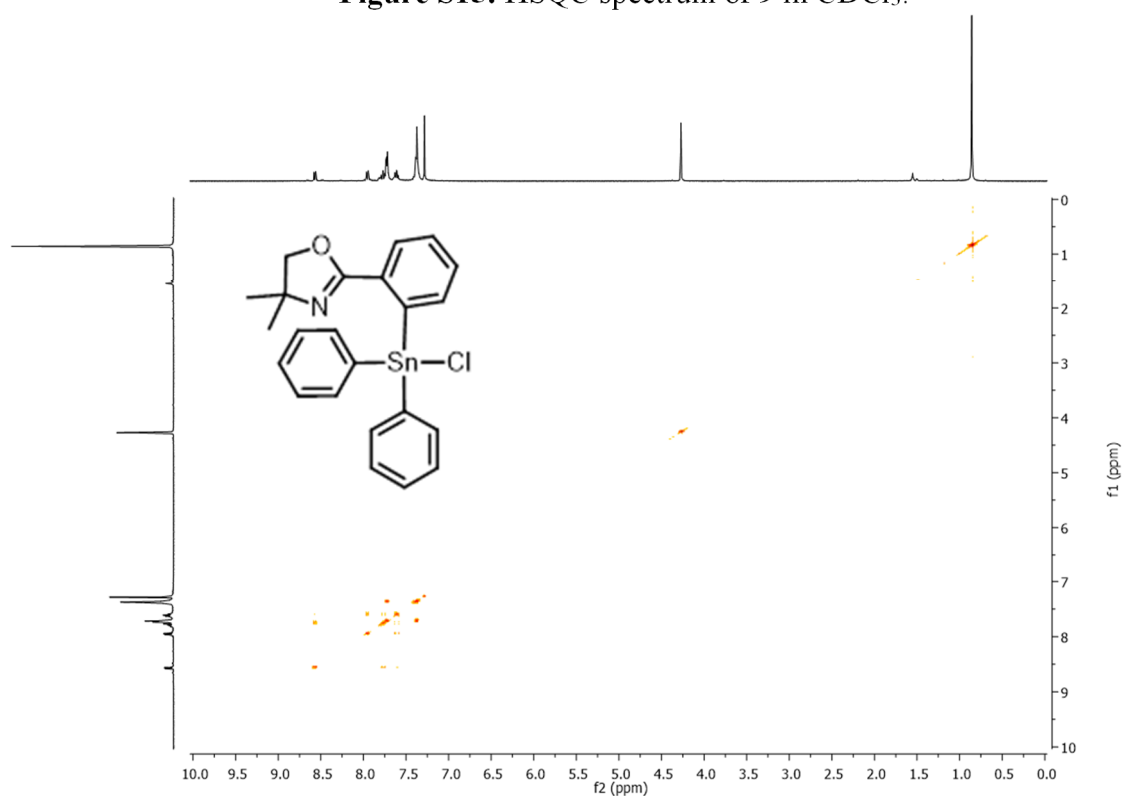



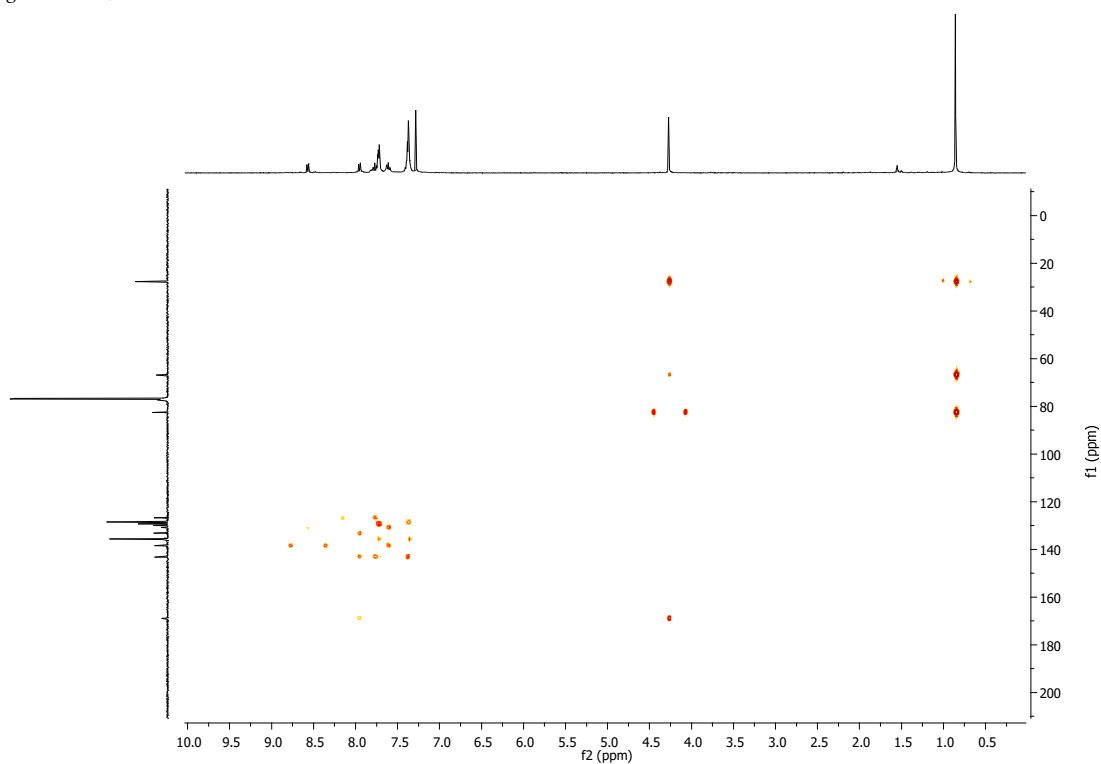

Figure S17: HMBC spectrum of **9** in CDCl<sub>3</sub>.

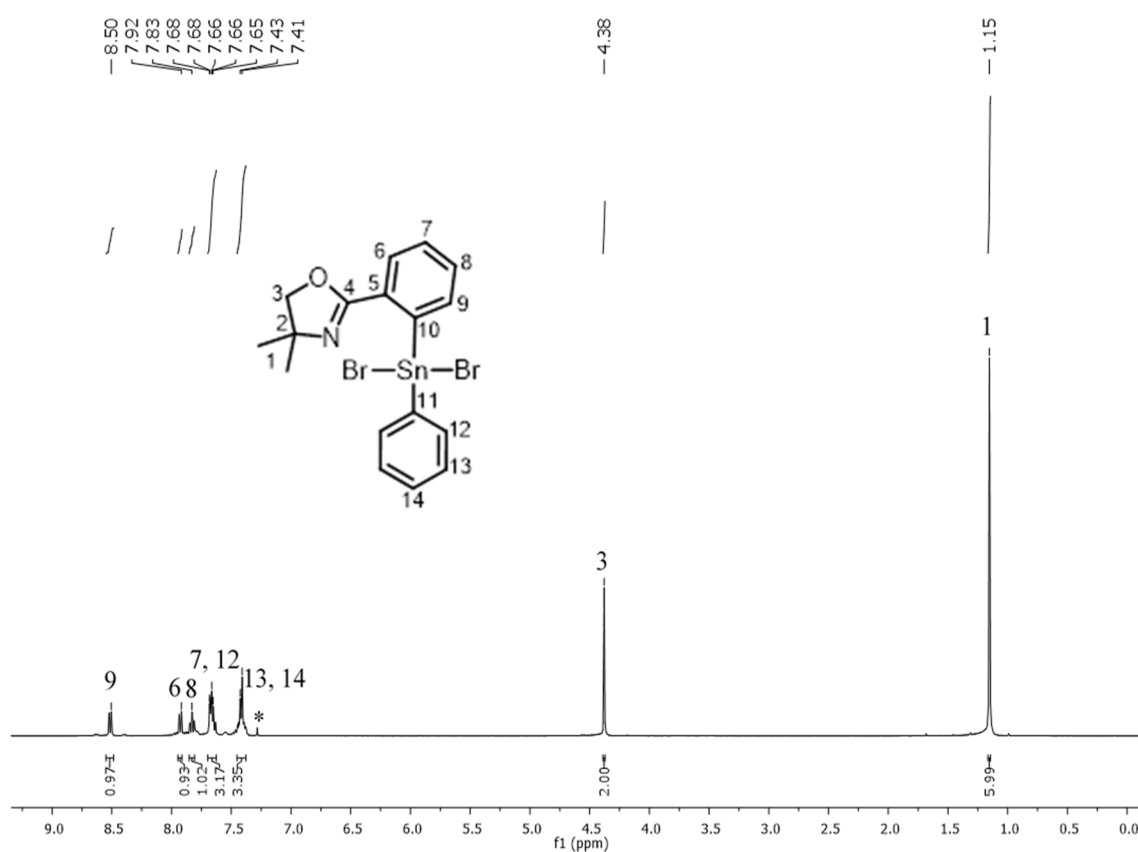

Figure S18: <sup>1</sup>H NMR spectrum of **10** in CDCl<sub>3</sub>.

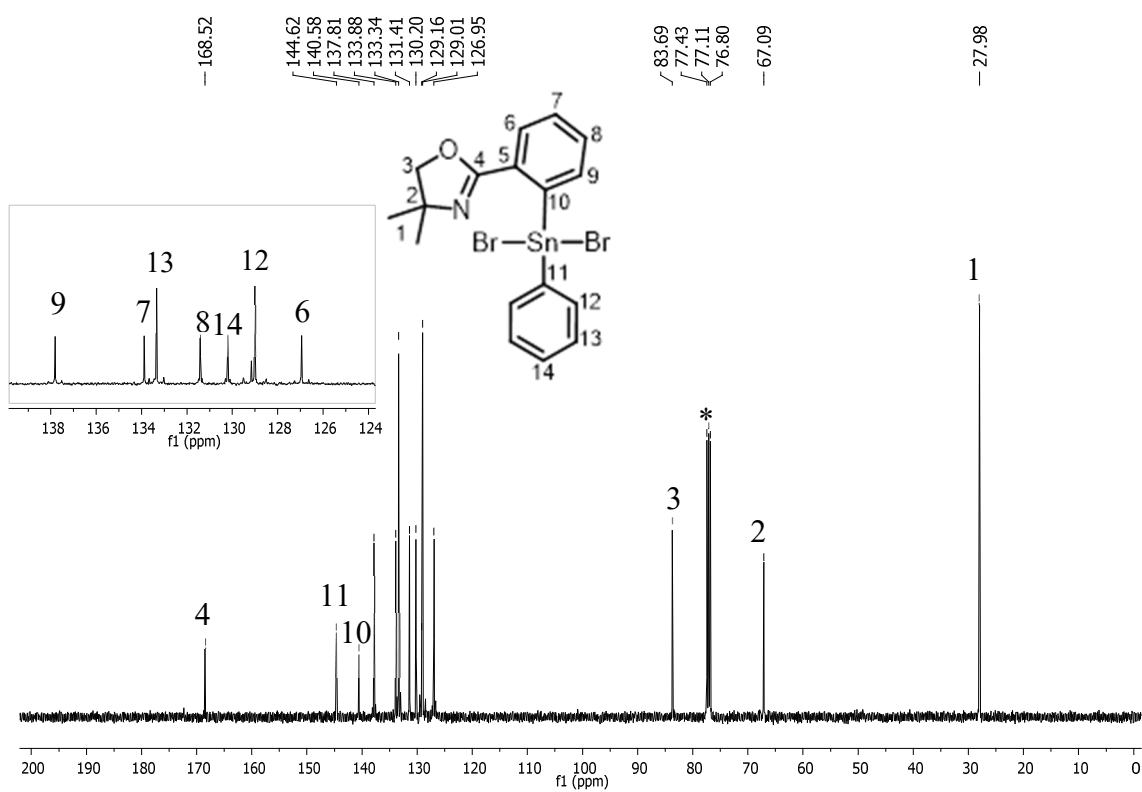

**Figure S19:**  $^{13}\text{C}$  NMR spectrum of **10** in  $\text{CDCl}_3^*$ .

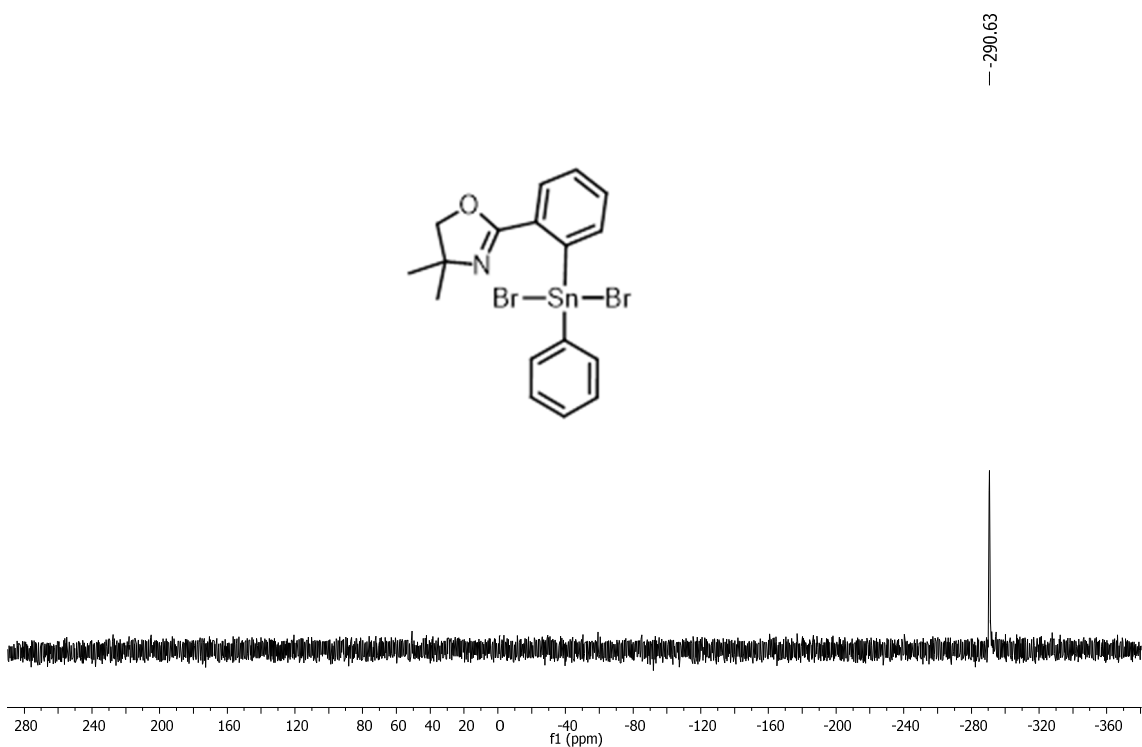

**Figure S20:**  $^{119}\text{Sn}$  NMR spectrum of **10** in  $\text{CDCl}_3$ .

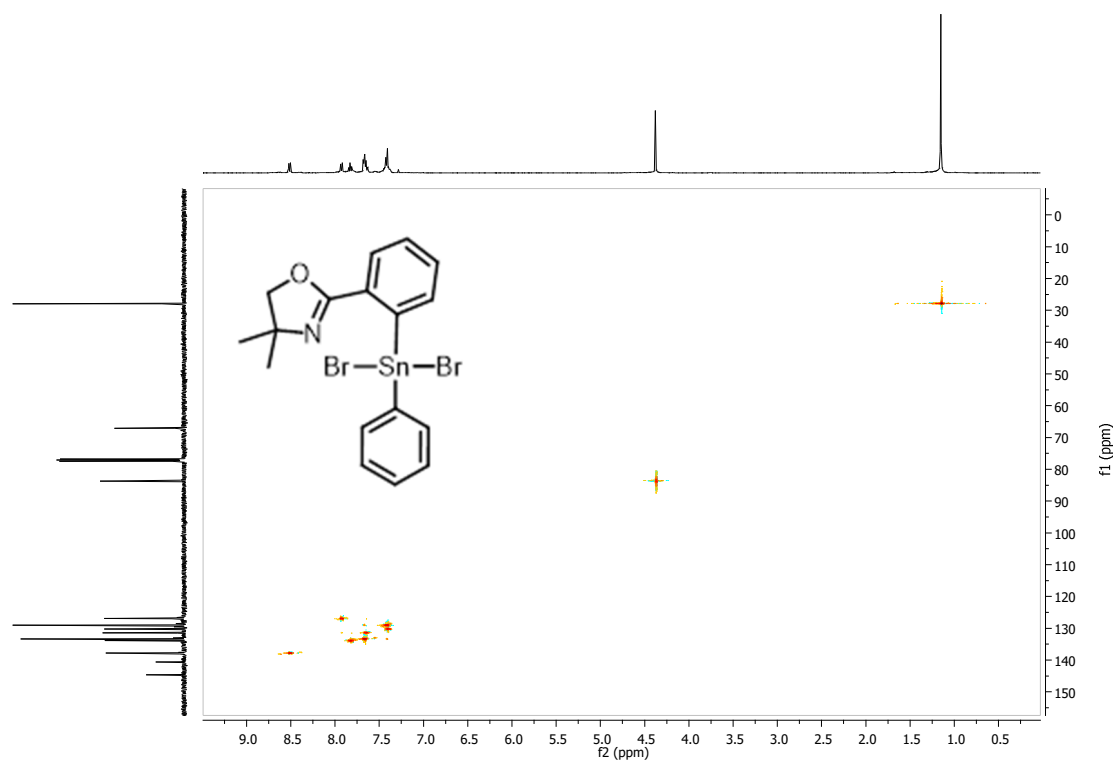

**Figure S21:** HSQC spectrum of **10** in  $\text{CDCl}_3$ .

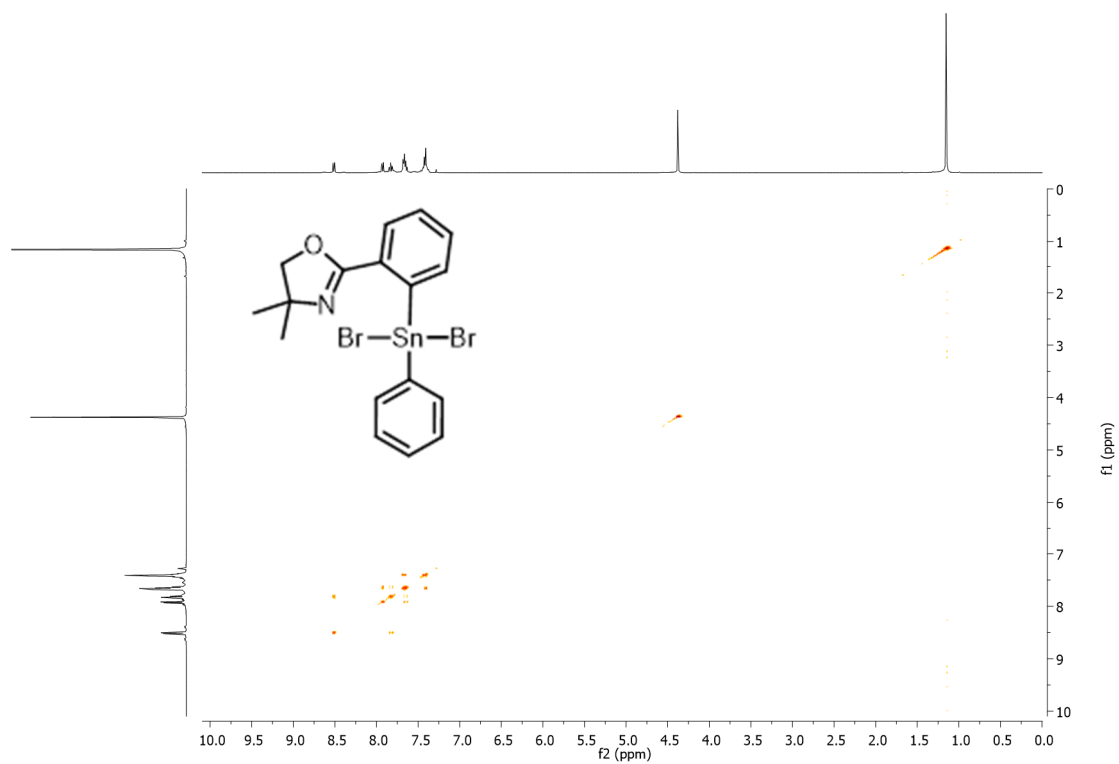

**Figure S22:** COSY spectrum of **10** in  $\text{CDCl}_3$ .

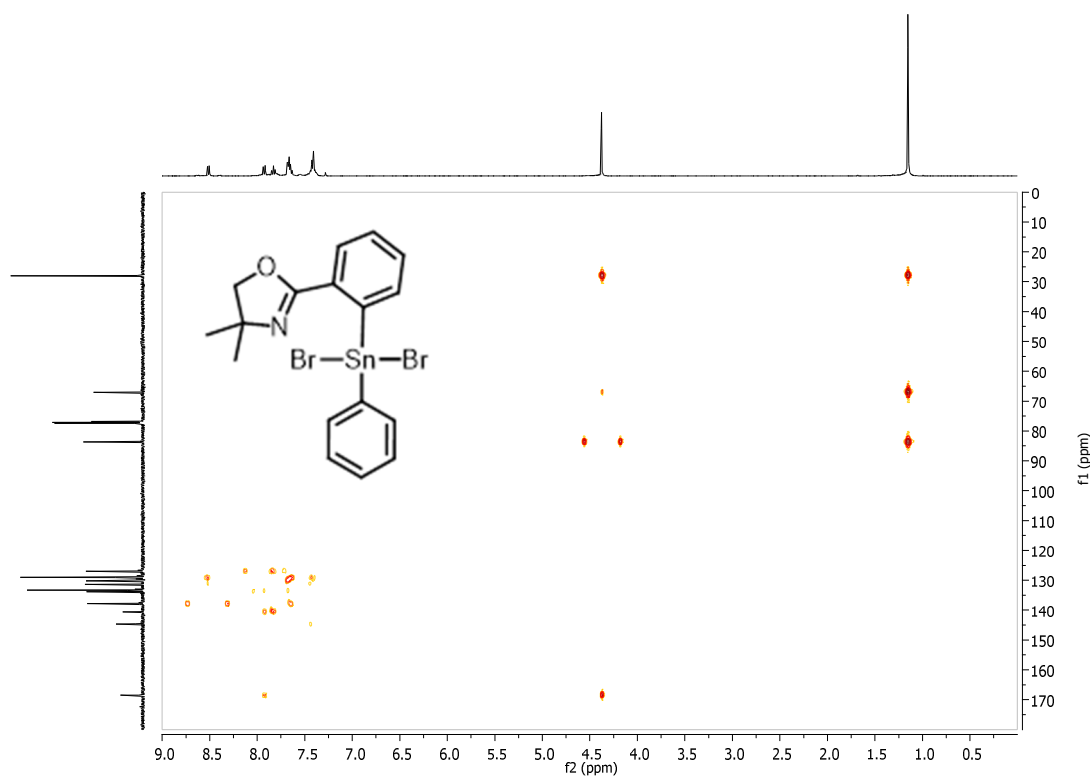Figure S23: HMBC spectrum of **10** in  $\text{CDCl}_3$ .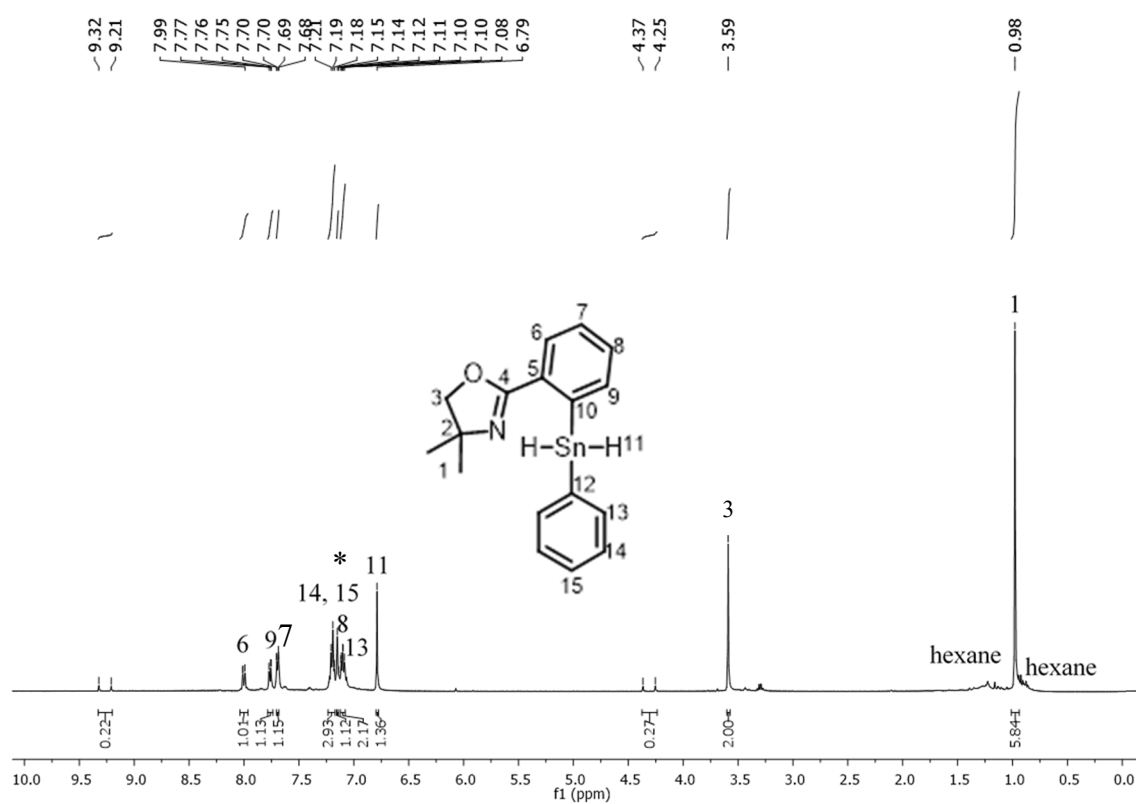Figure S24:  $^1\text{H}$  NMR spectrum of **12** in  $\text{C}_6\text{D}_6^*$ .

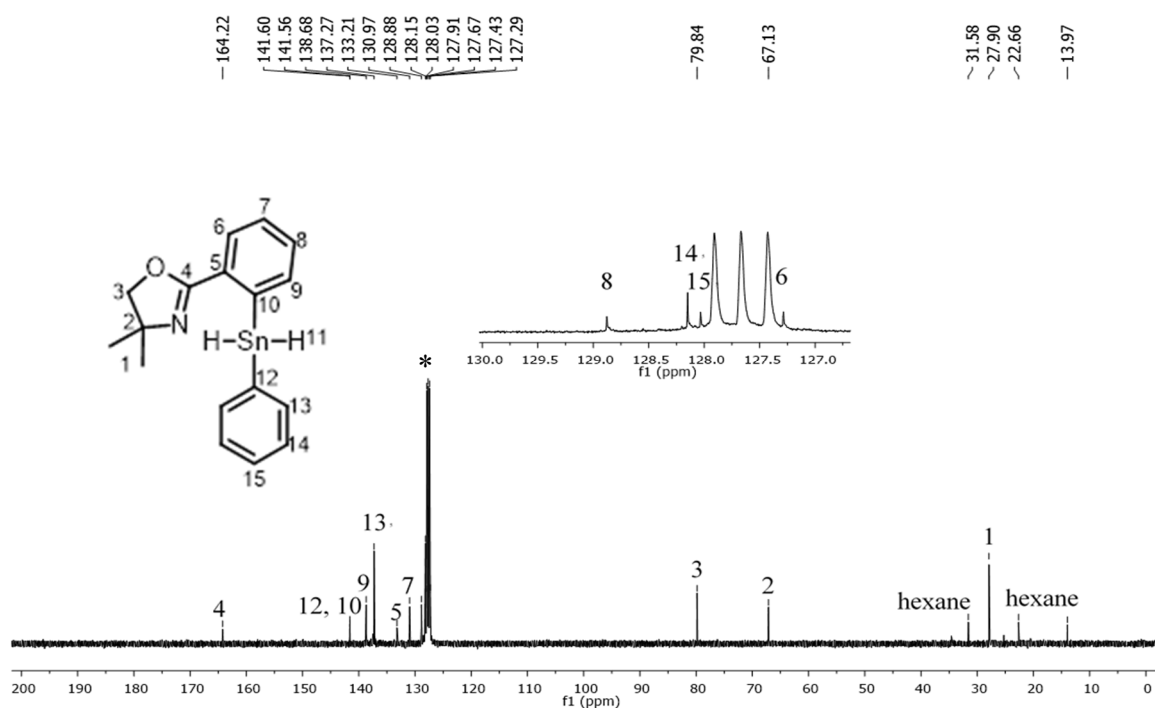

**Figure S25:**  $^{13}\text{C}$  NMR spectrum of **12** in  $\text{C}_6\text{D}_6^*$ .

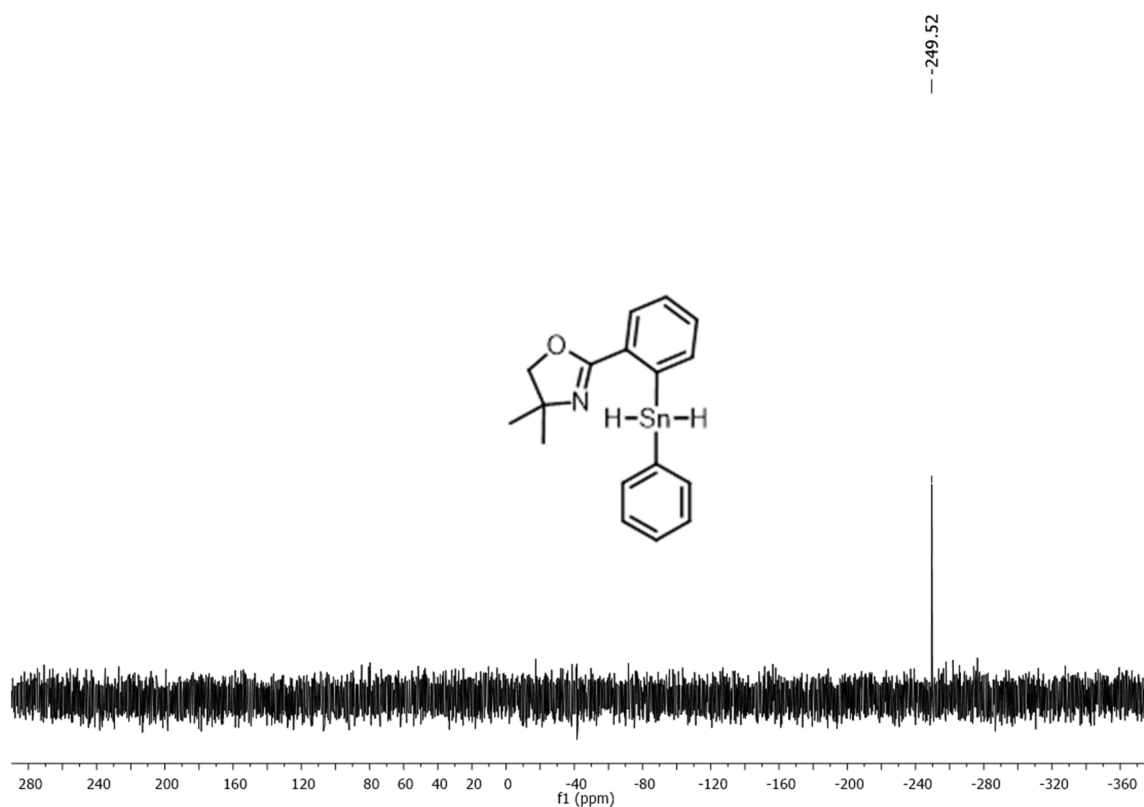

**Figure S26:**  $^{119}\text{Sn}$  NMR spectrum of **12** in  $\text{C}_6\text{D}_6$ .

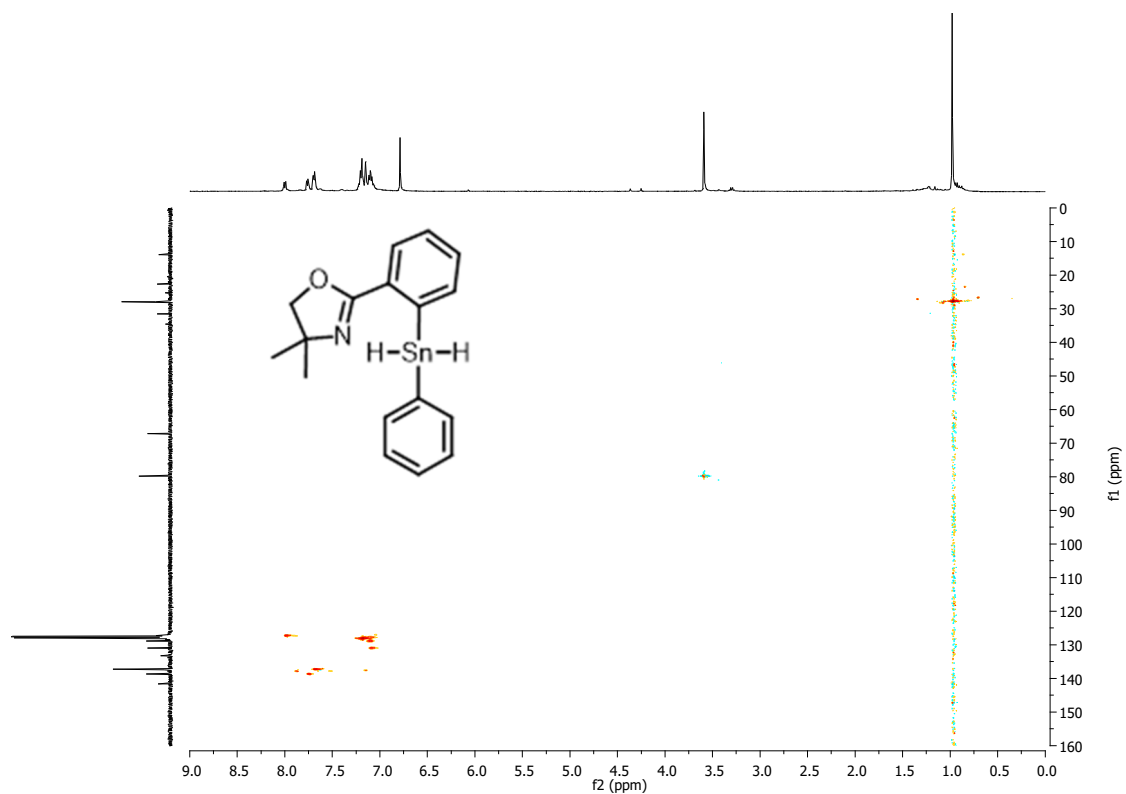

**Figure S27:** HSQC spectrum of **12** in  $C_6D_6$ .

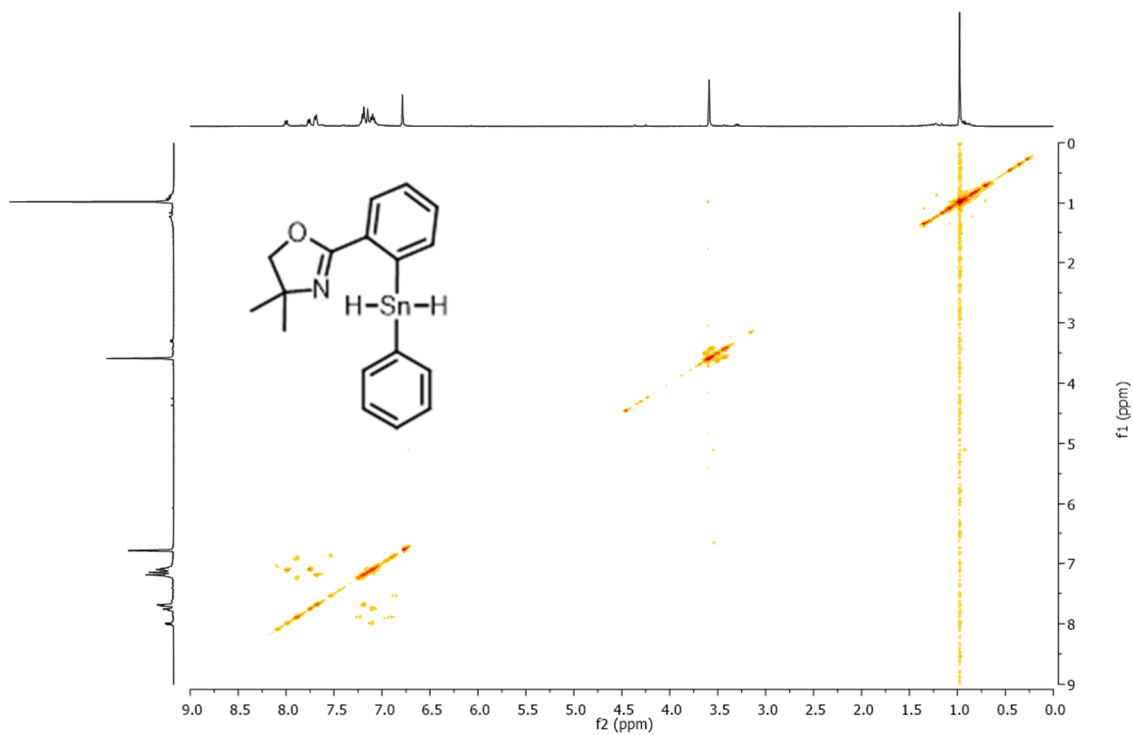

**Figure S28:** COSY spectrum of **12** in  $C_6D_6$ .

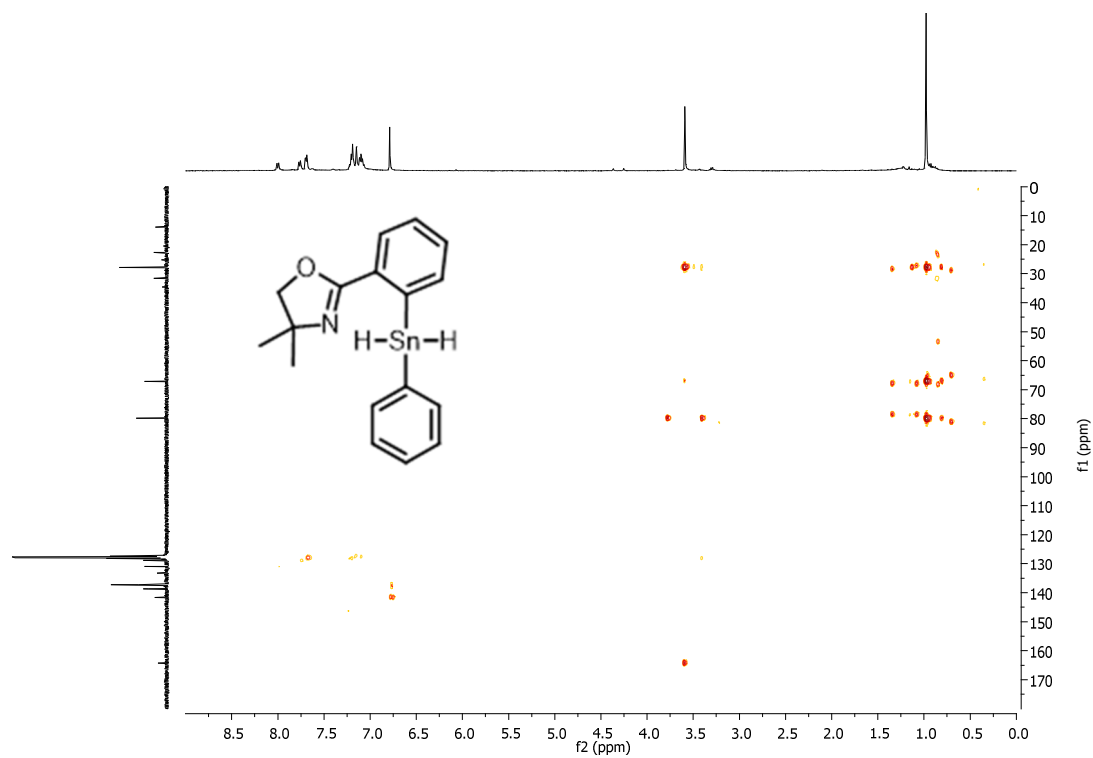Figure S29: HMBC spectrum of **12** in C<sub>6</sub>D<sub>6</sub>.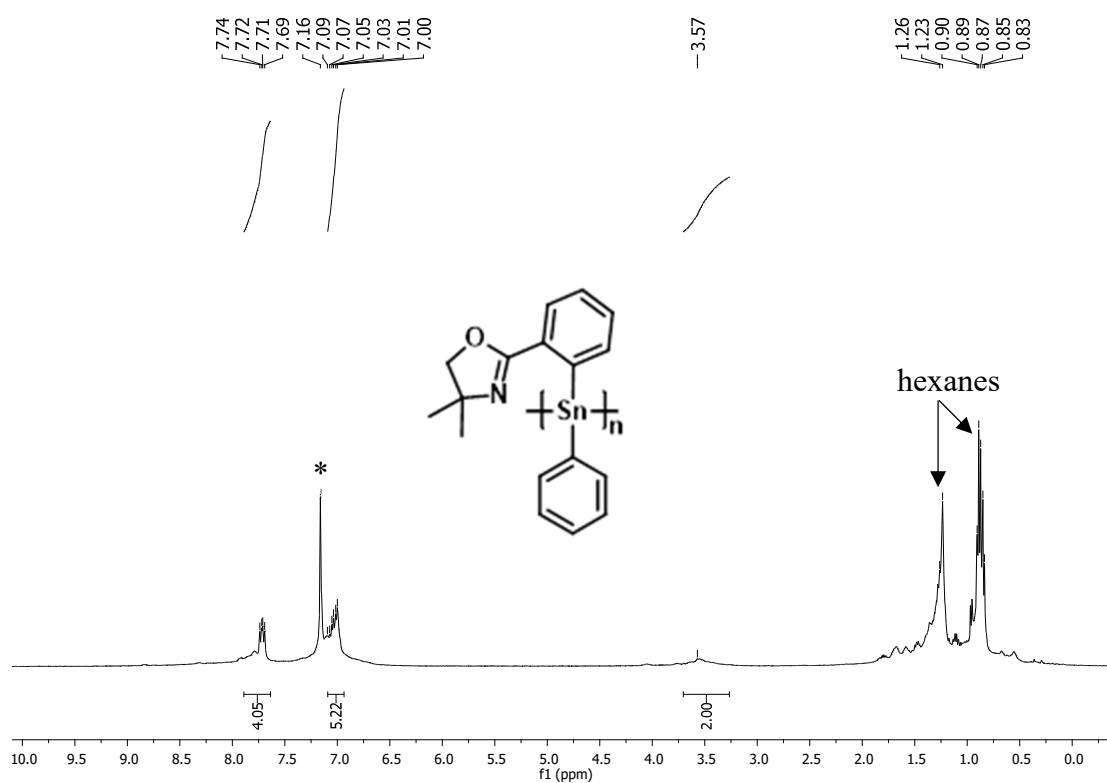Figure S30: <sup>1</sup>H NMR spectrum of **14** in C<sub>6</sub>D<sub>6</sub>\*.

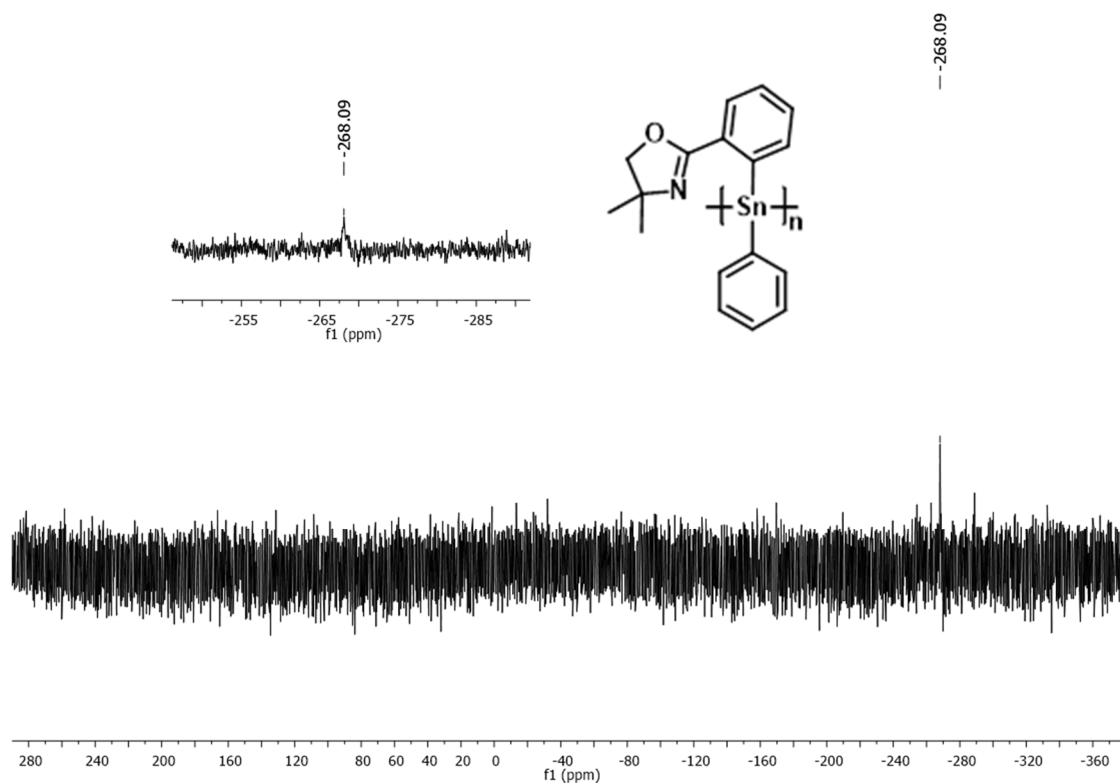

**Figure S31:**  $^{119}\text{Sn}$  NMR spectrum of **14** in  $\text{C}_6\text{D}_6$ .

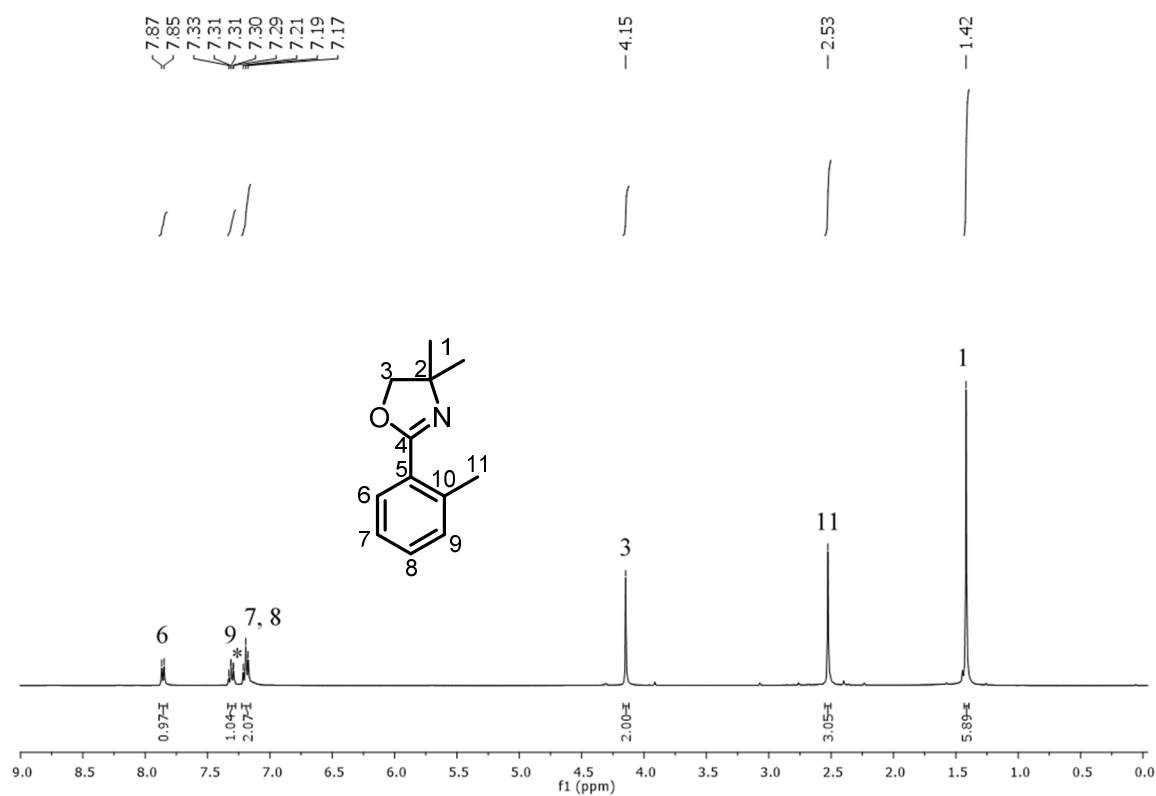

**Figure S32:**  $^1\text{H}$  NMR spectrum of **8** in  $\text{CDCl}_3^*$ .



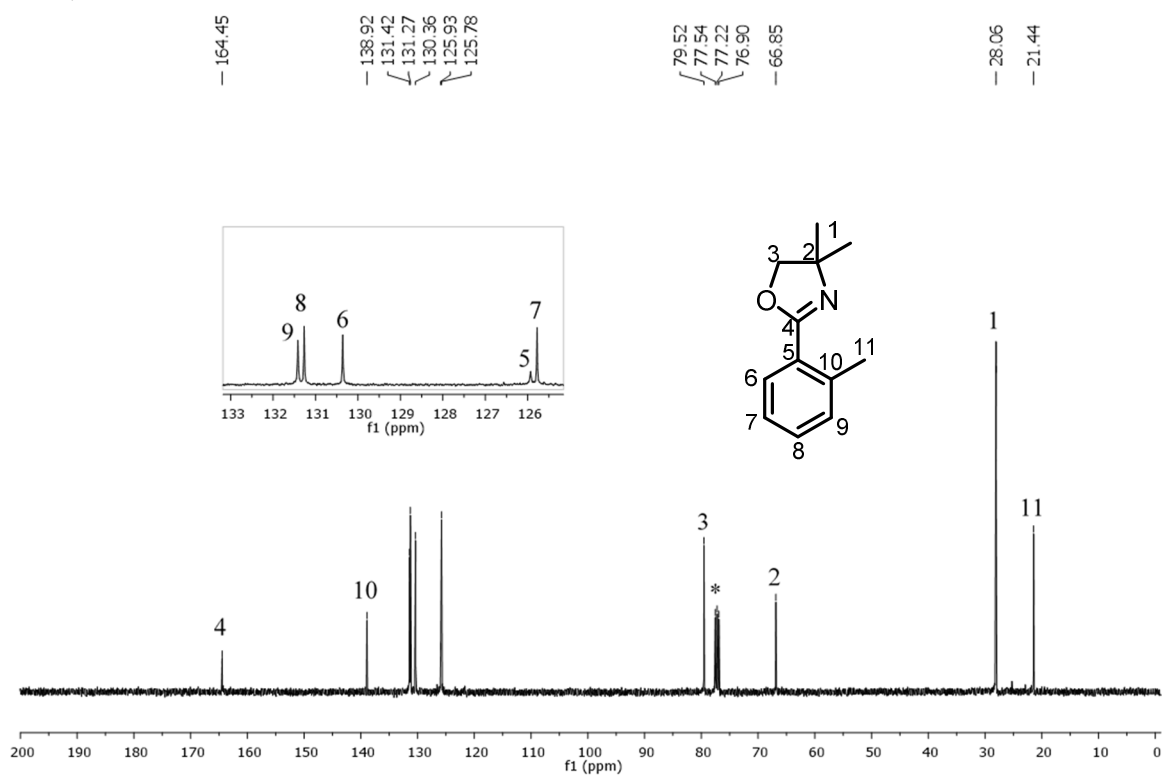

Figure S33:  $^{13}\text{C}$  NMR spectrum of **8** in  $\text{CDCl}_3^*$ .

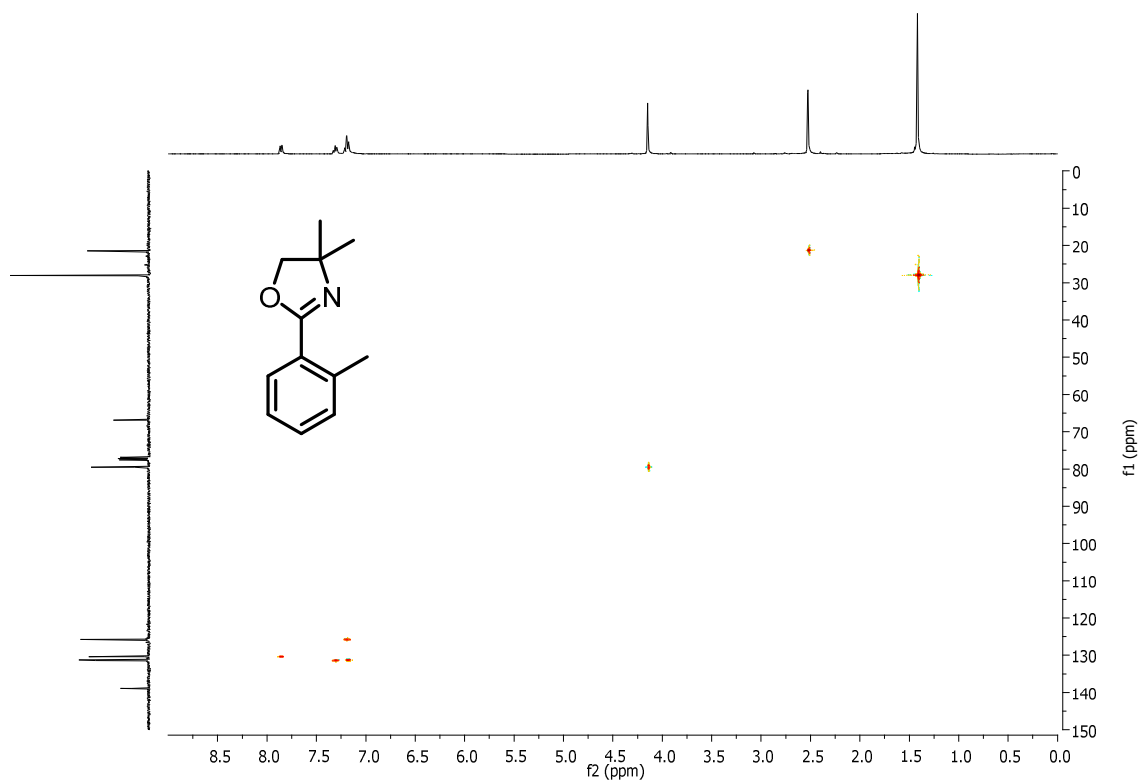

Figure S34: HSQC spectrum of **8** in  $\text{CDCl}_3^*$ .

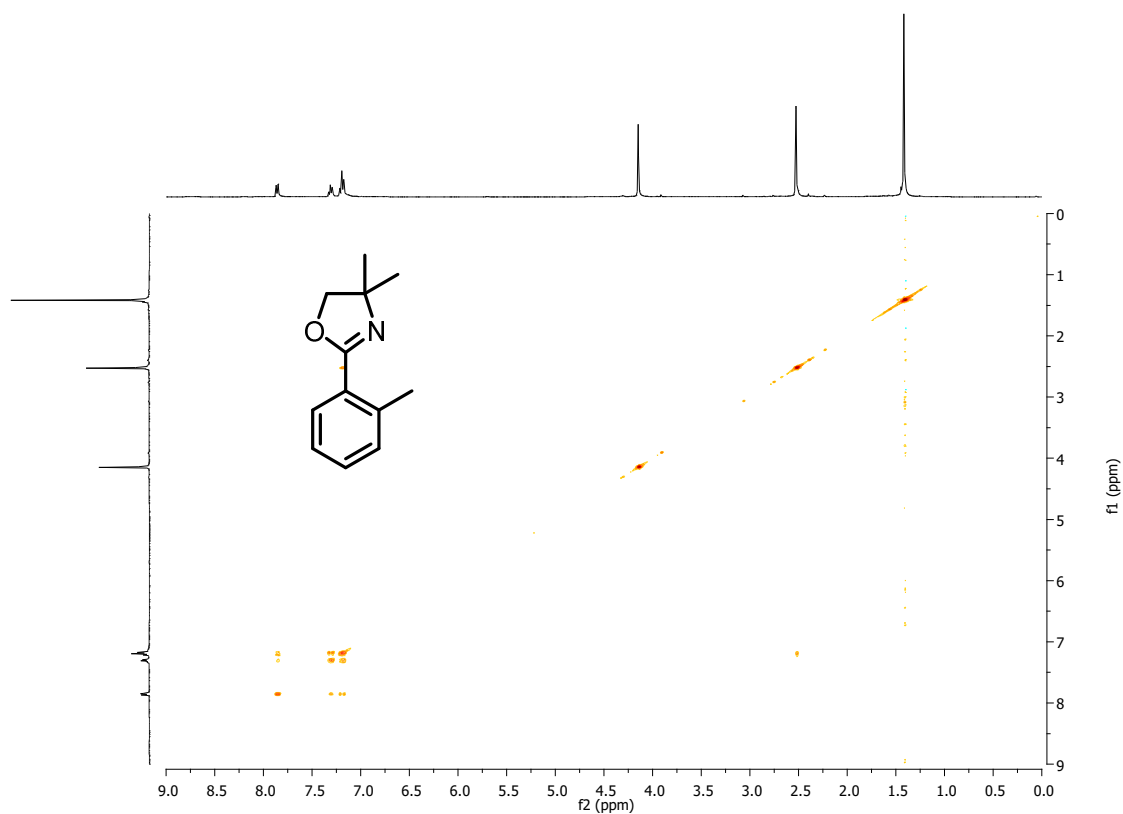

**Figure S35:** COSY spectrum of **8** in CDCl<sub>3</sub>\*.

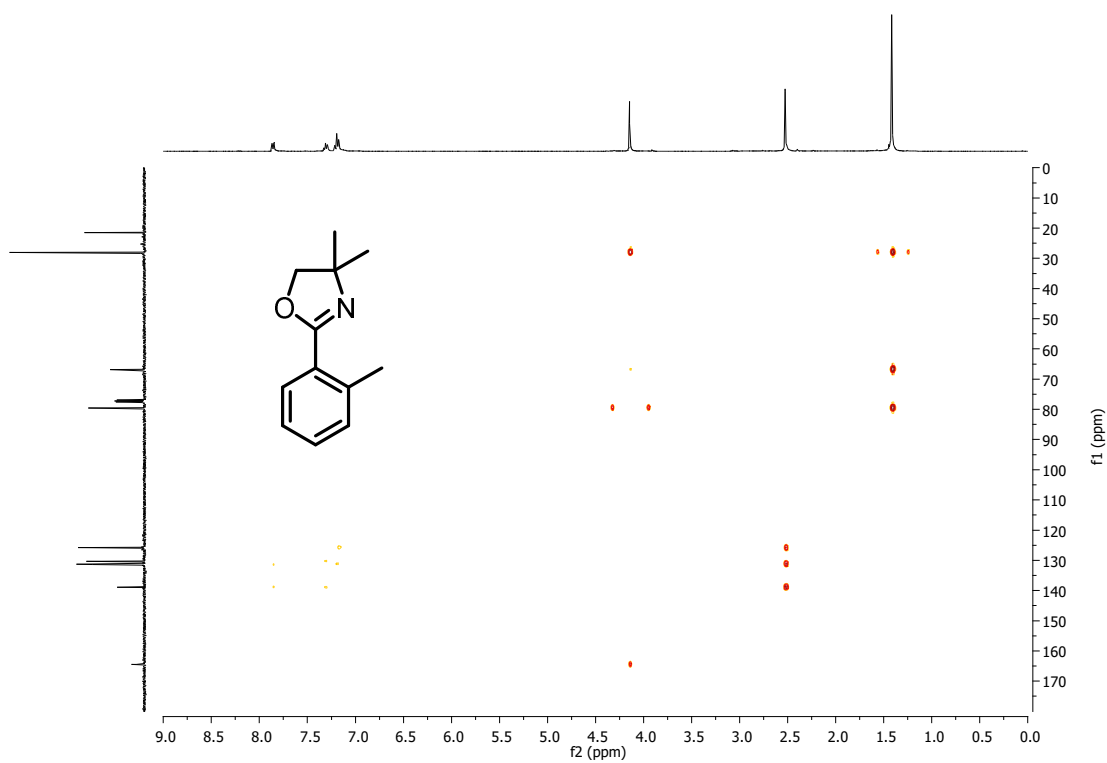

**Figure S36:** HMBC spectrum of **8** in CDCl<sub>3</sub>\*.

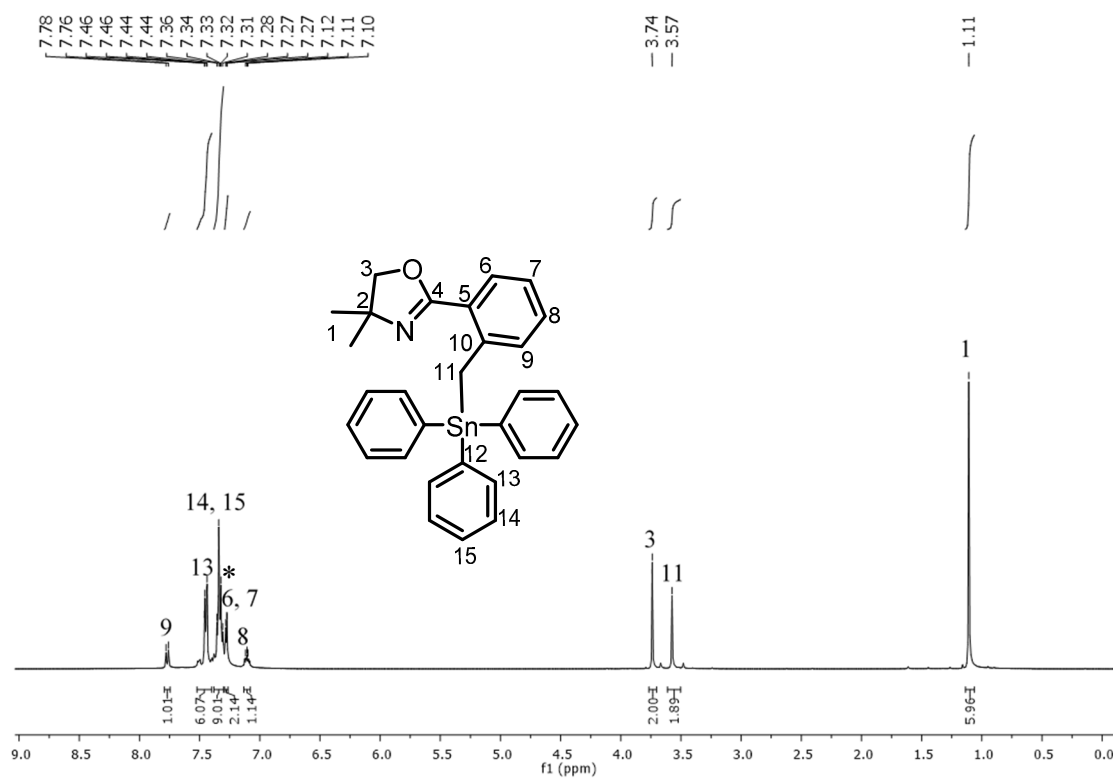

**Figure S37:**  $^1\text{H}$  NMR spectrum of **4** in  $\text{CDCl}_3^*$ .

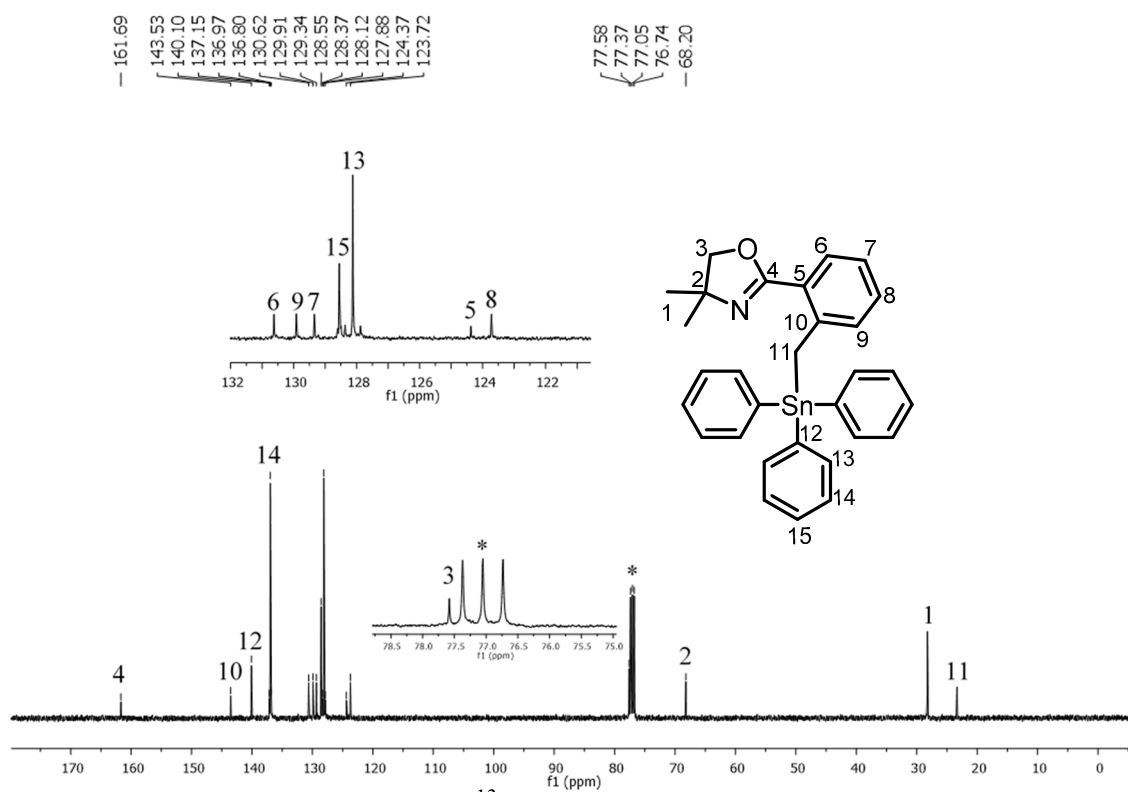

**Figure S38:**  $^{13}\text{C}$  NMR spectrum of **4** in  $\text{CDCl}_3^*$ .

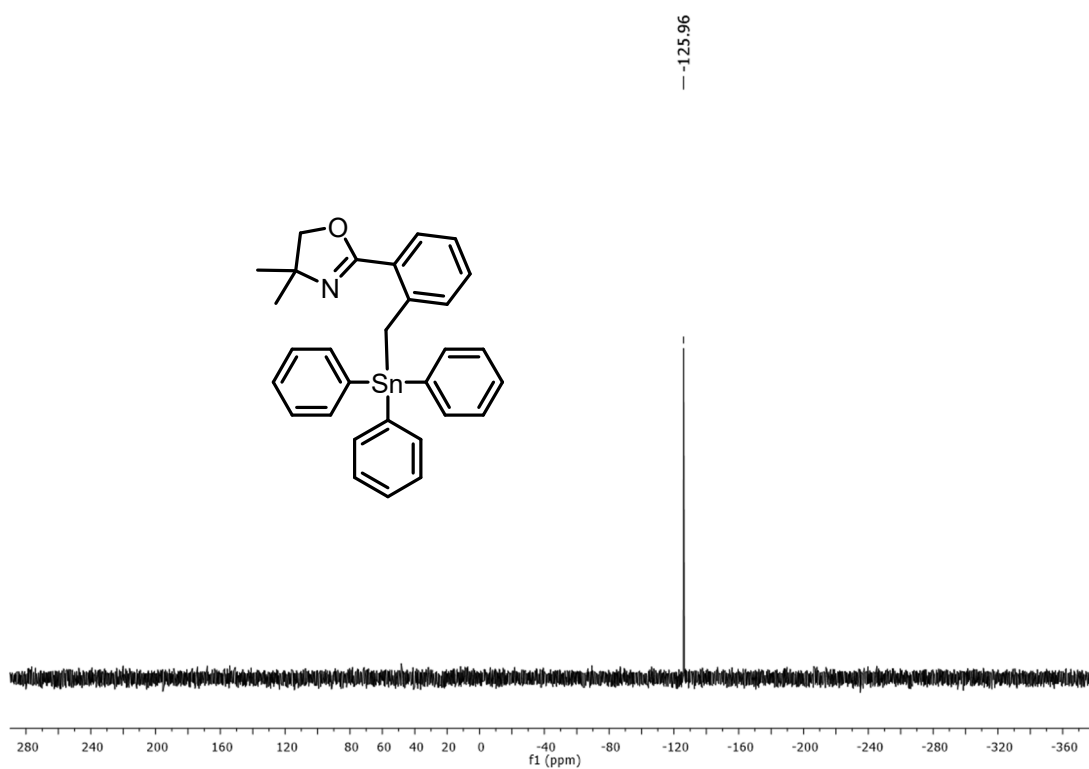

Figure S39:  $^{119}\text{Sn}$  NMR spectrum of **4** in  $\text{CDCl}_3$ .

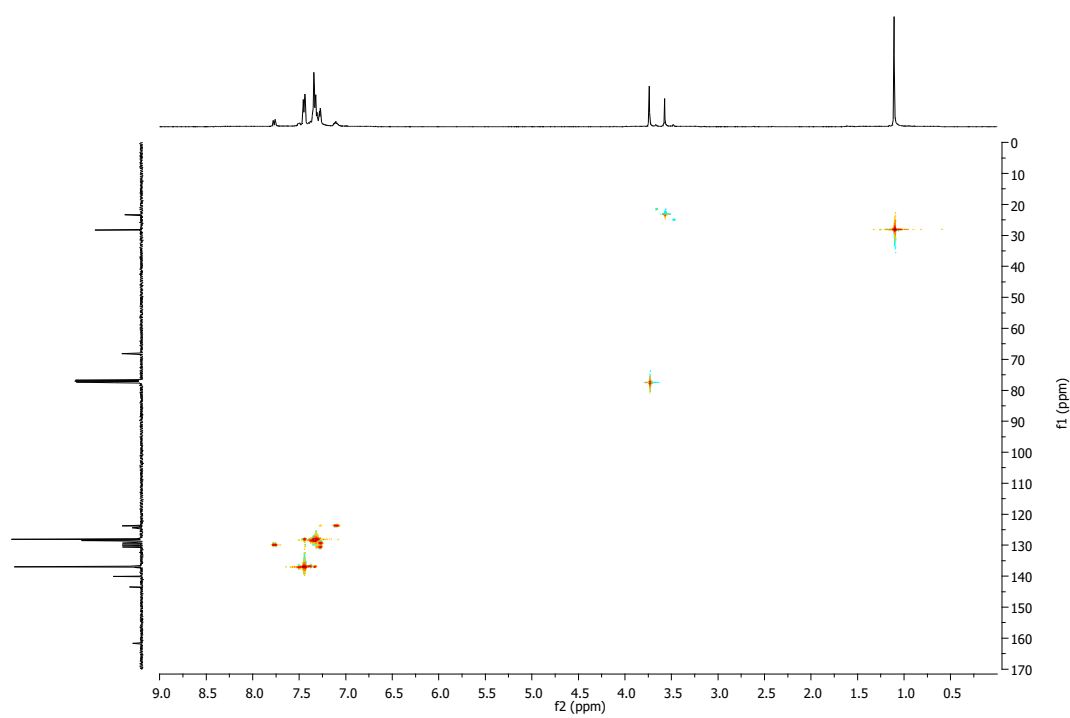

Figure S40: HSQC spectrum of **4** in  $\text{CDCl}_3$ .

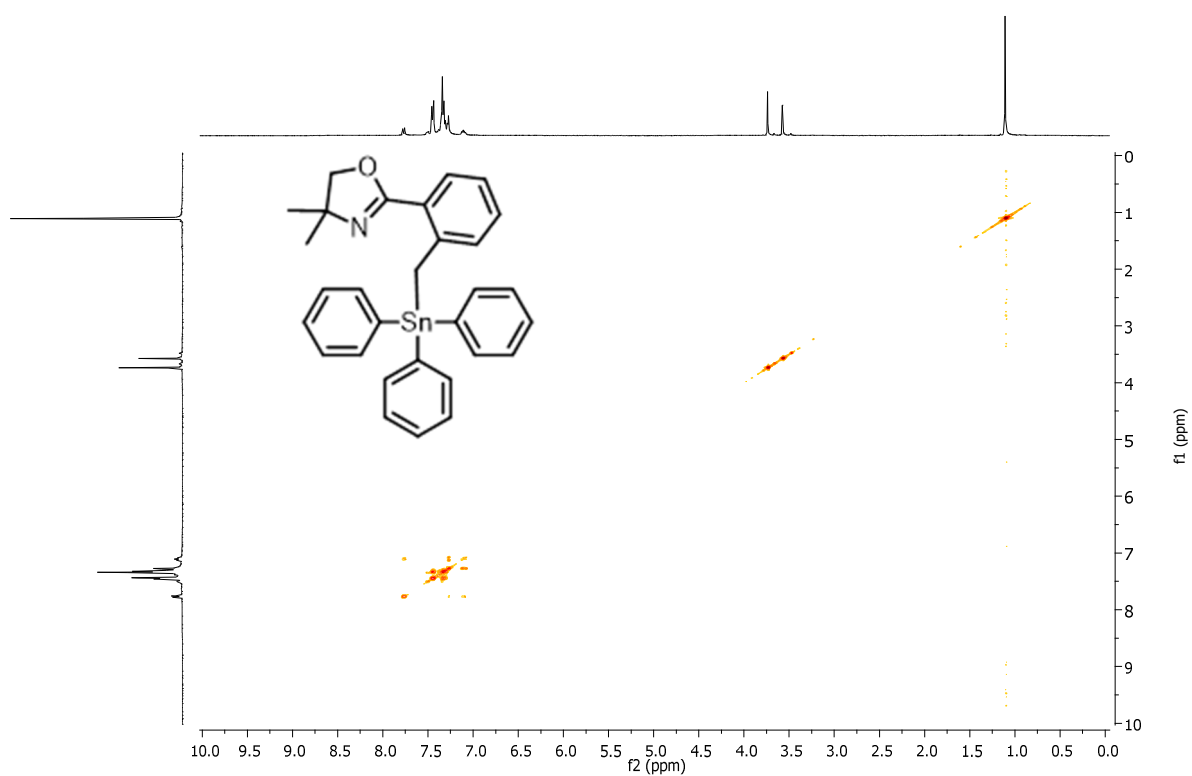

**Figure S41:** COSY spectrum of **4** in CDCl<sub>3</sub>.

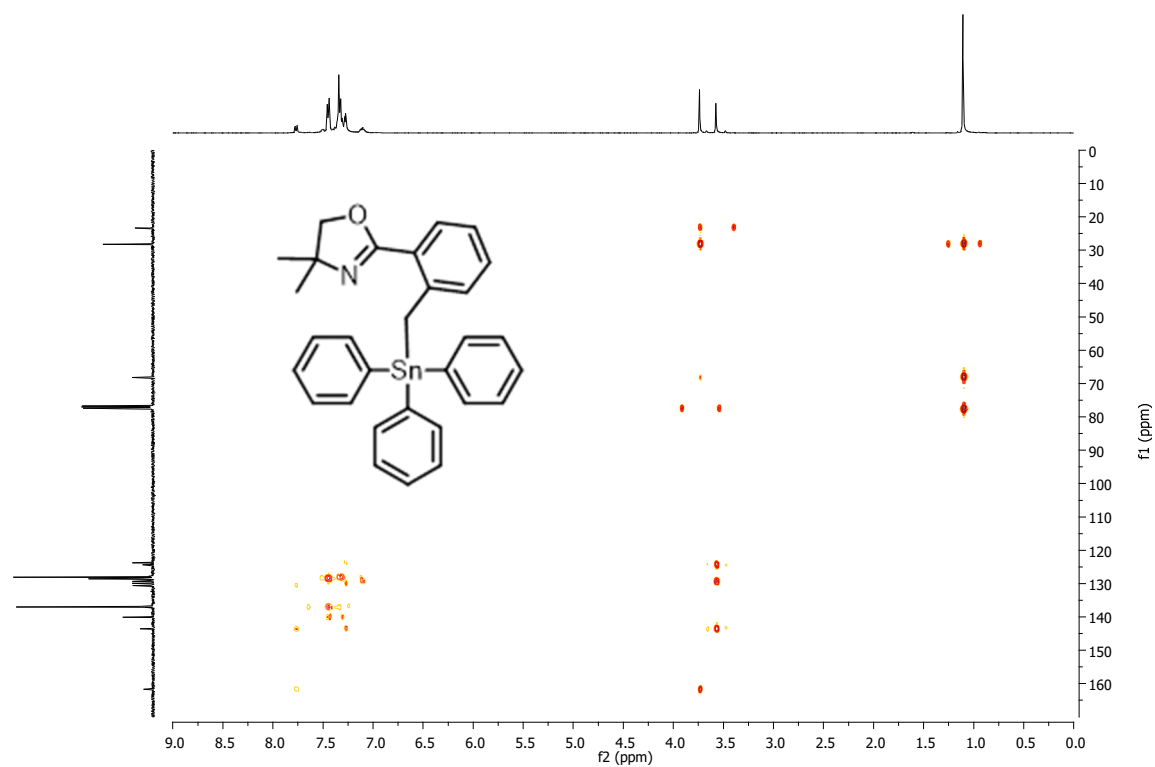

**Figure S42:** HMBC spectrum of **4** in CDCl<sub>3</sub>.

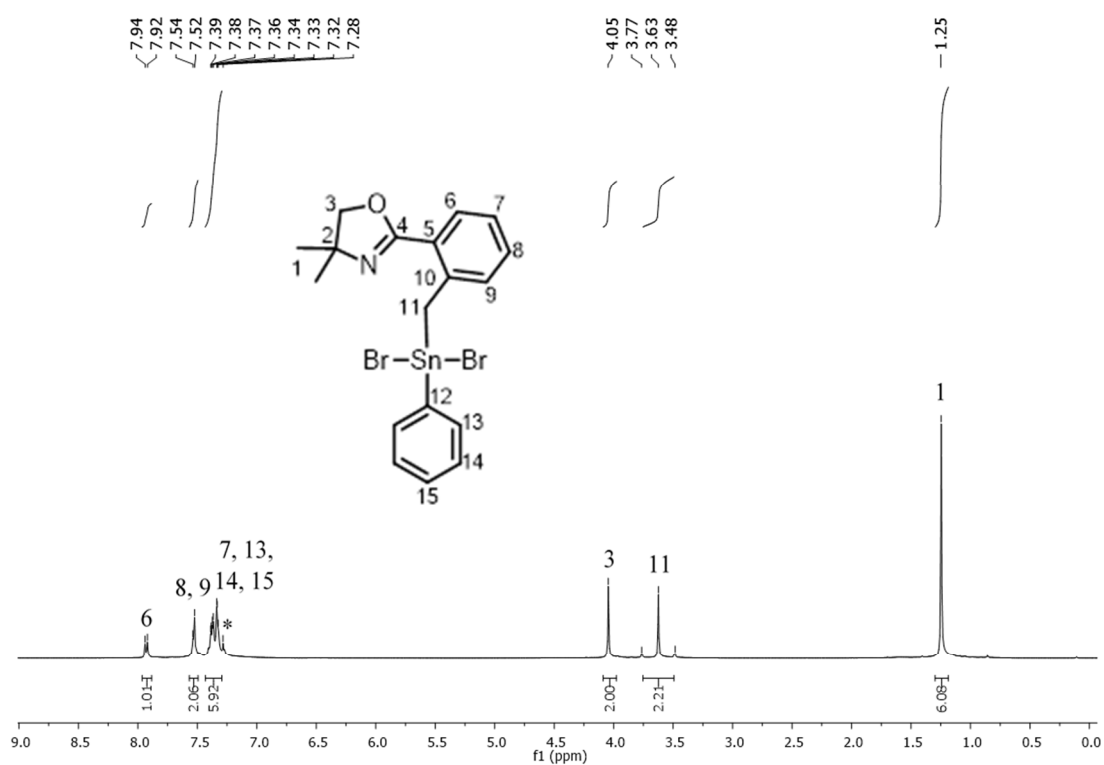

**Figure S43:**  $^1\text{H}$  NMR spectrum of **11** in  $\text{CDCl}_3^*$ .

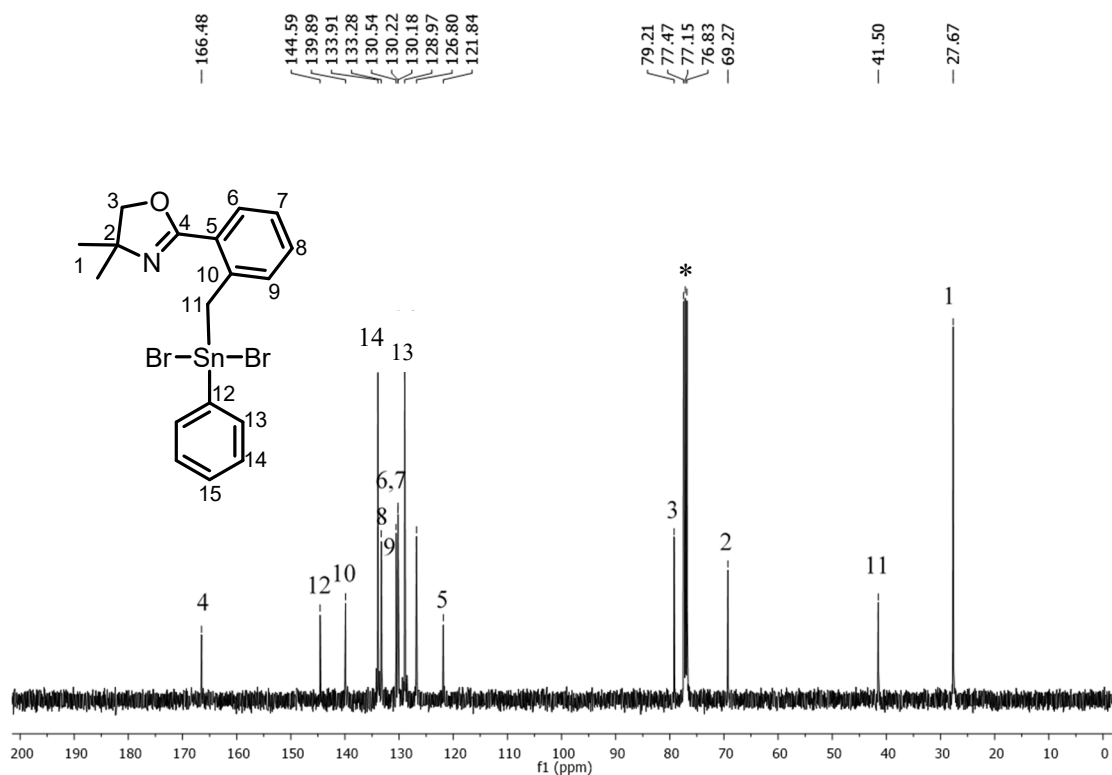

**Figure S44:**  $^{13}\text{C}$  NMR spectrum of **11** in  $\text{CDCl}_3^*$ .

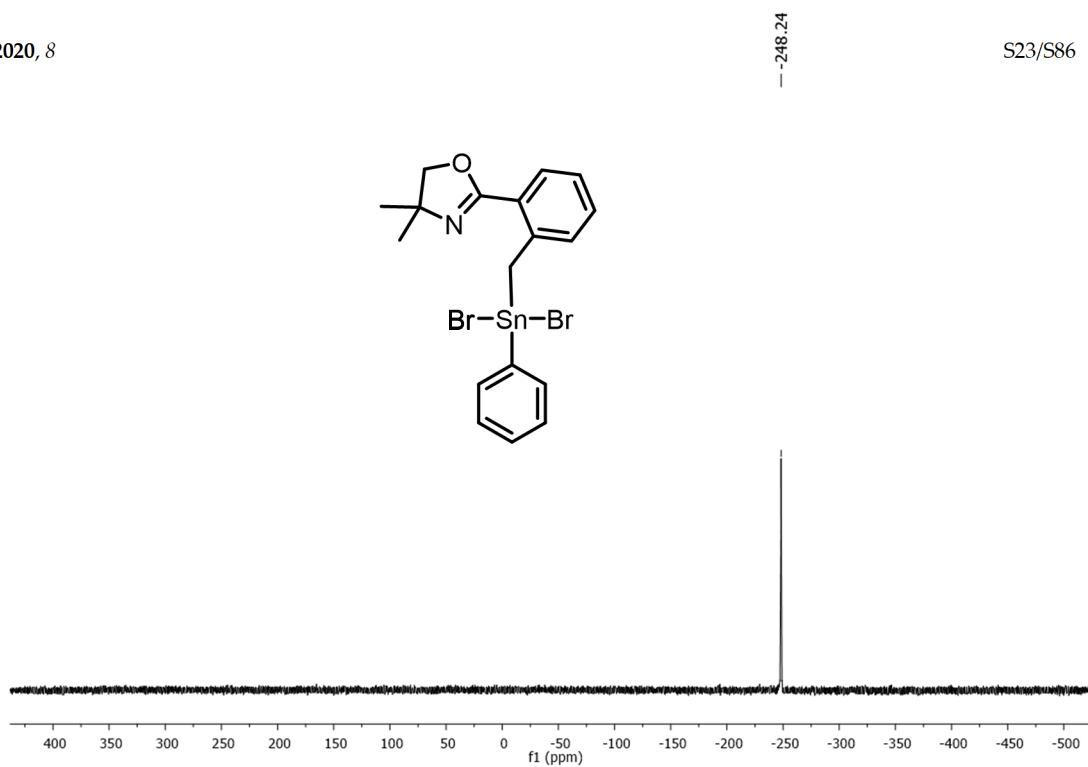

**Figure S45:**  $^{119}\text{Sn}$  NMR spectrum of **11** in  $\text{CDCl}_3$ .

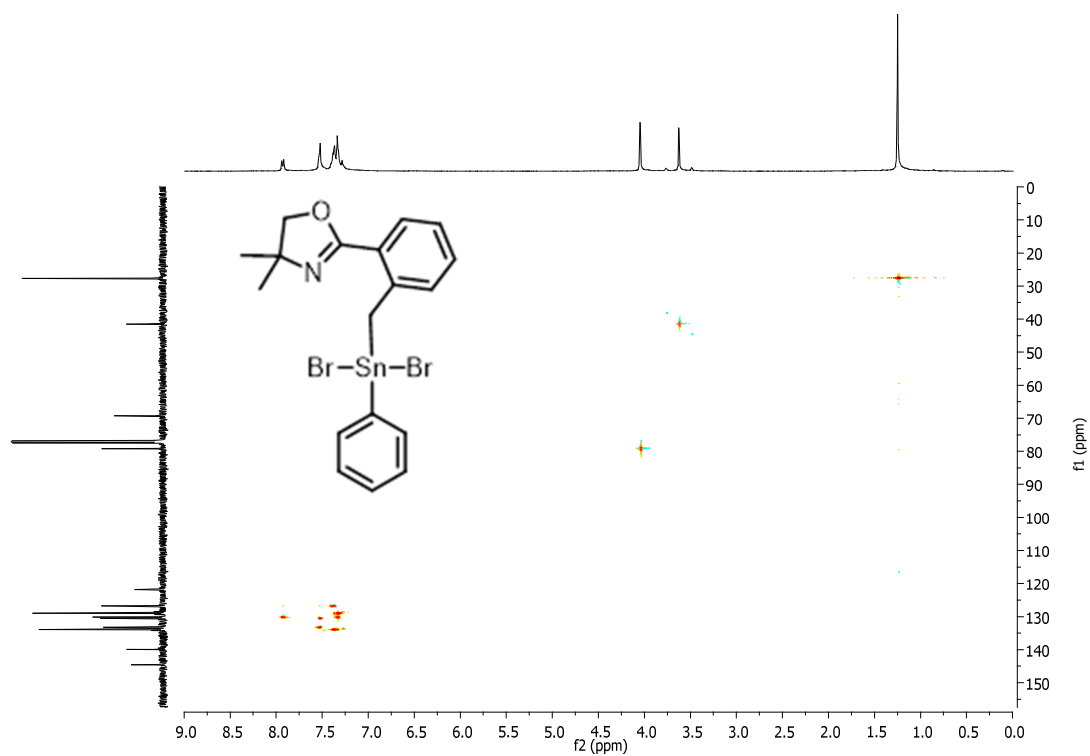

**Figure S46:** HSQC spectrum of **11** in  $\text{CDCl}_3$ .

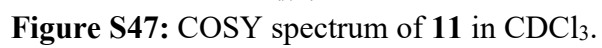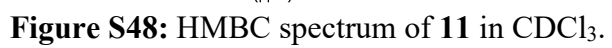



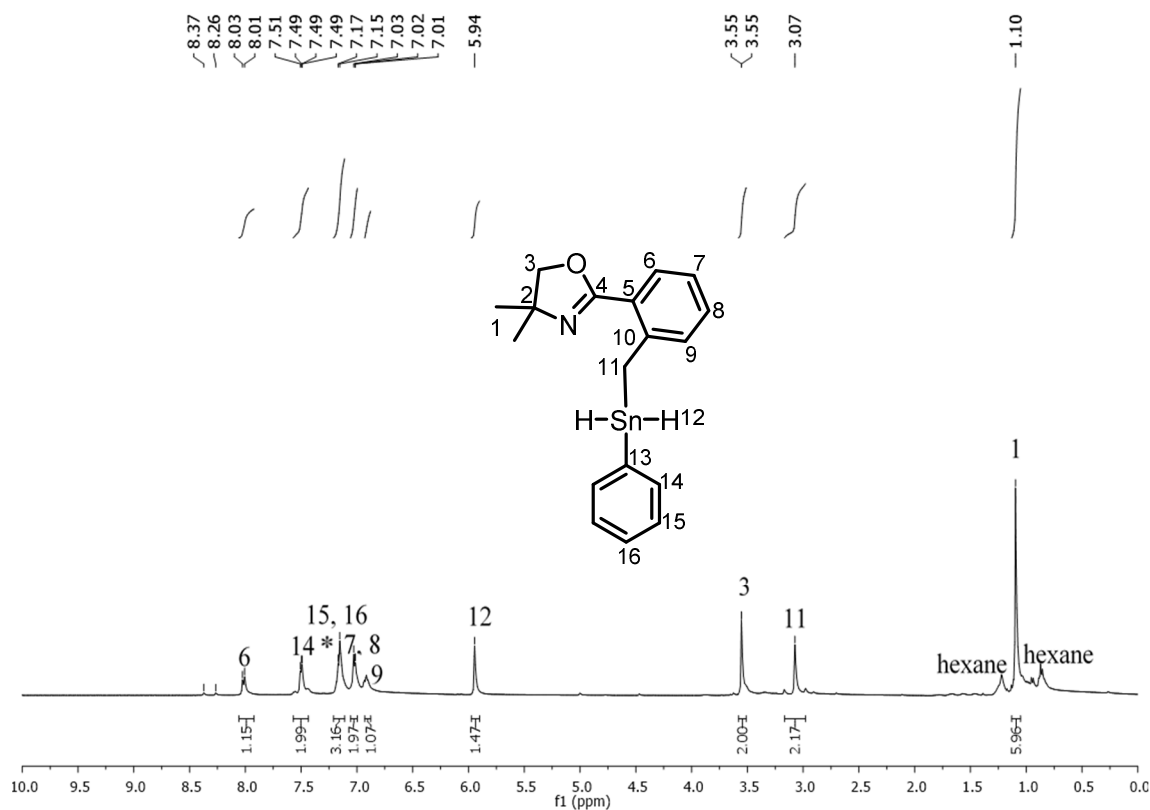

**Figure S49:**  $^1\text{H}$  NMR spectrum of **13** in  $\text{C}_6\text{D}_6^*$ .

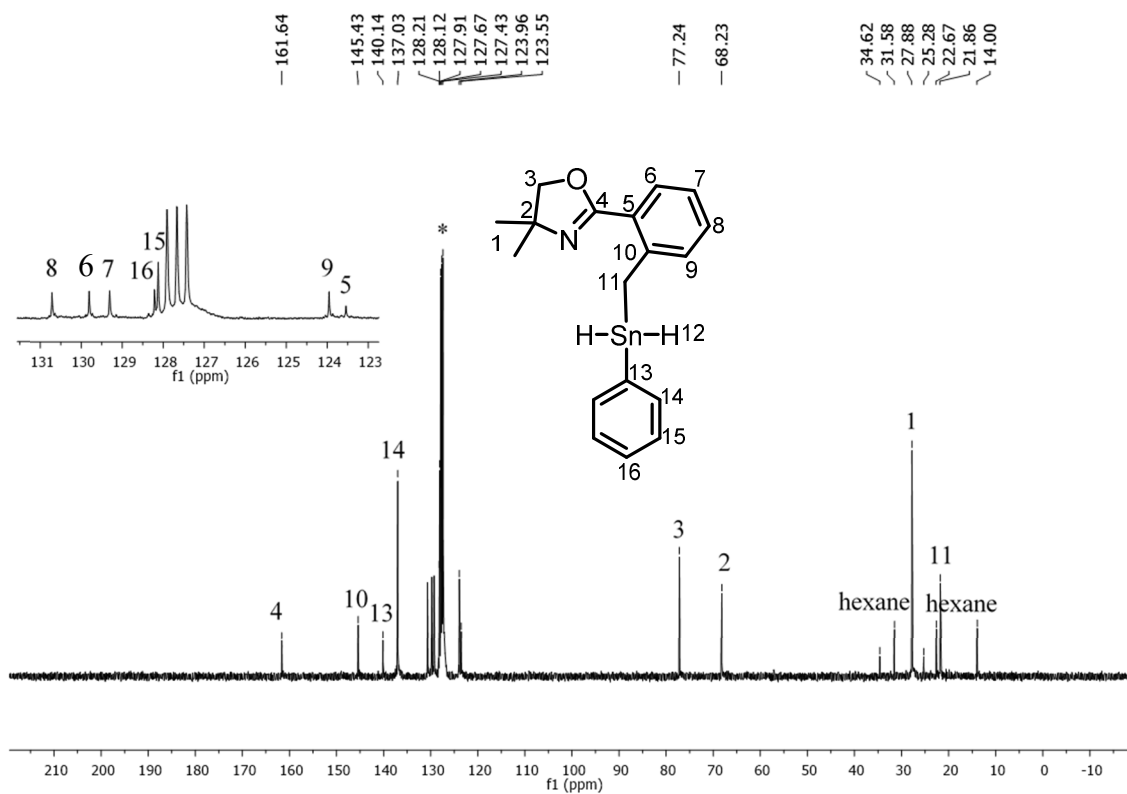

**Figure S50:**  $^{13}\text{C}$  NMR spectrum of **13** in  $\text{C}_6\text{D}_6^*$ .

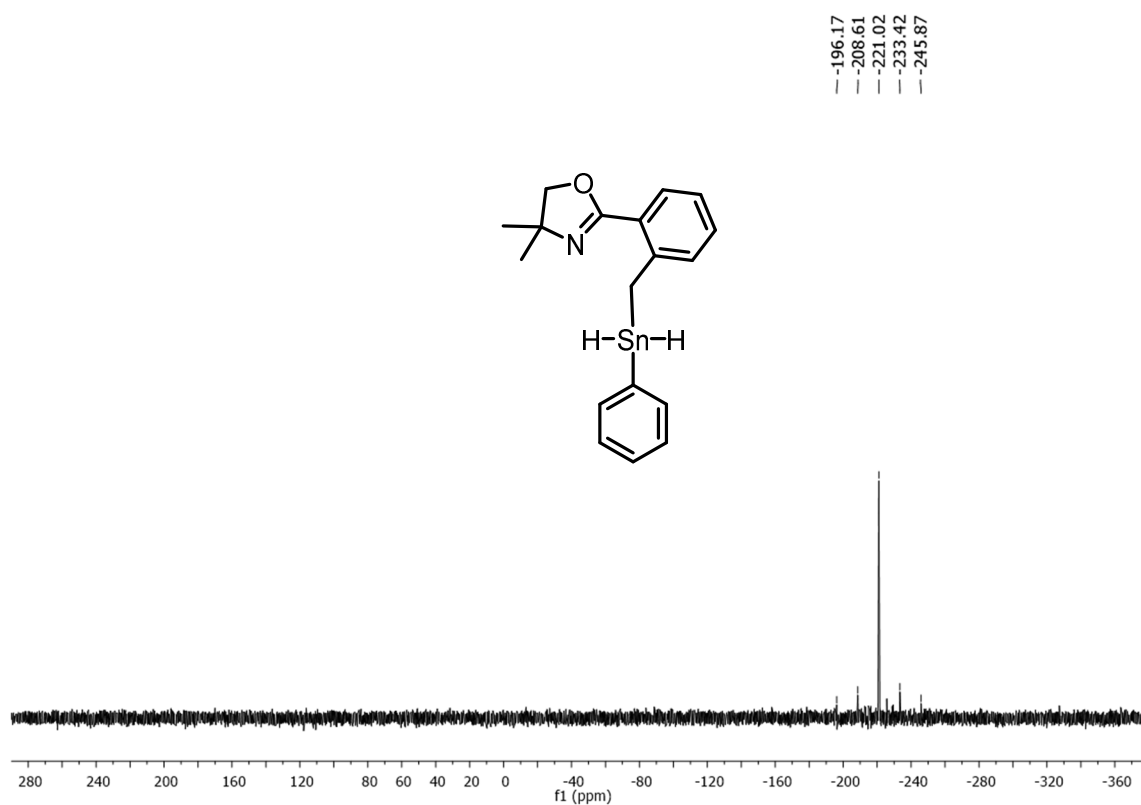

**Figure S51:**  $^{119}\text{Sn}$  NMR spectrum of **13** in  $\text{C}_6\text{D}_6$ .

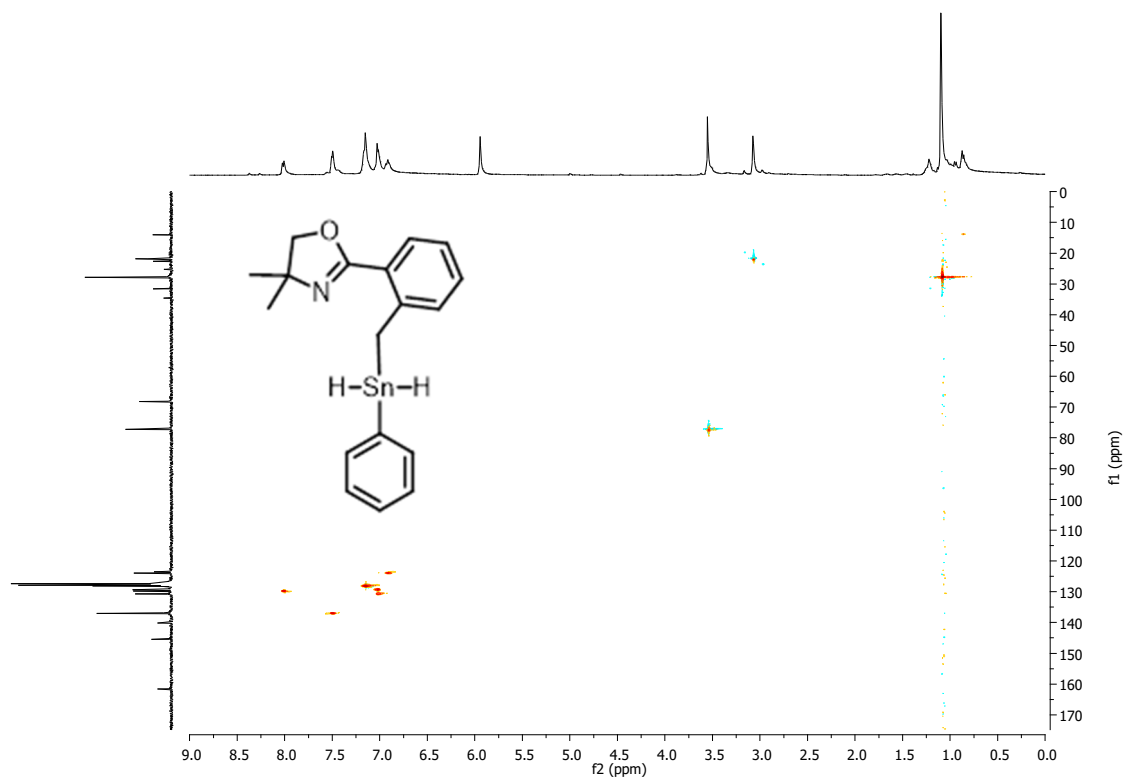

**Figure S52:** HSQC spectrum of **13** in  $\text{C}_6\text{D}_6$ .

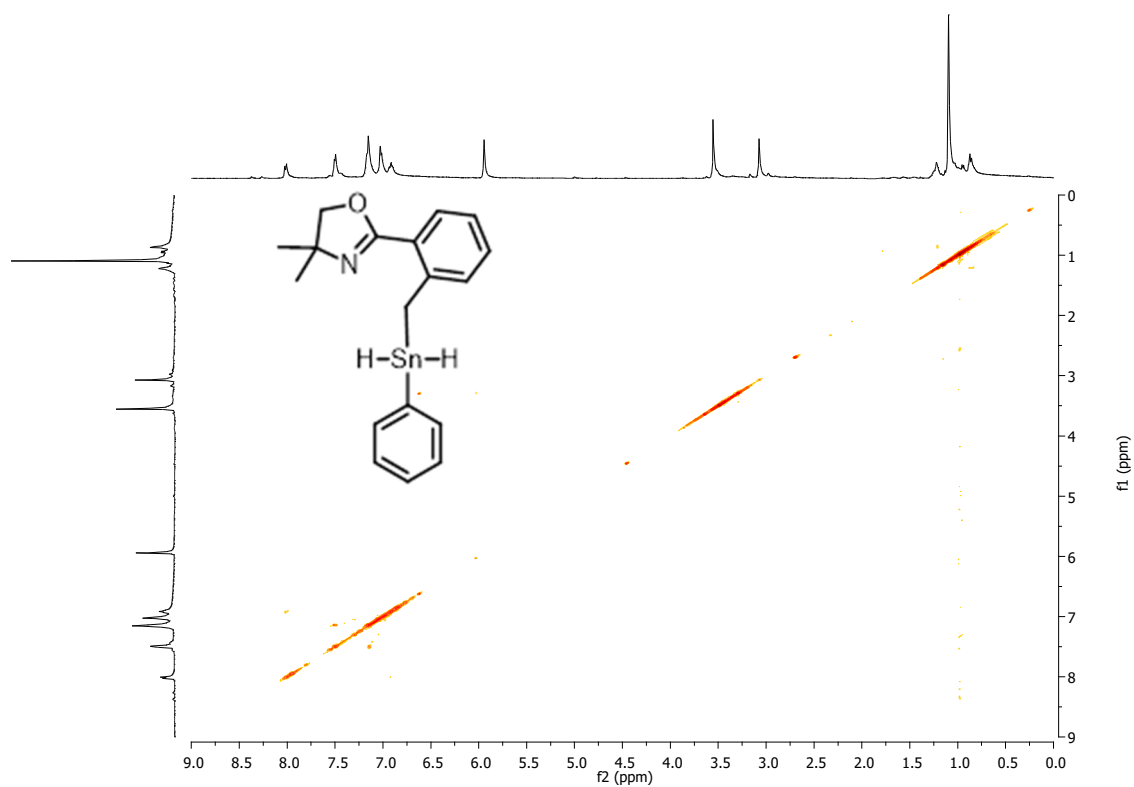

**Figure S53:** COSY spectrum of **13** in  $C_6D_6$ .

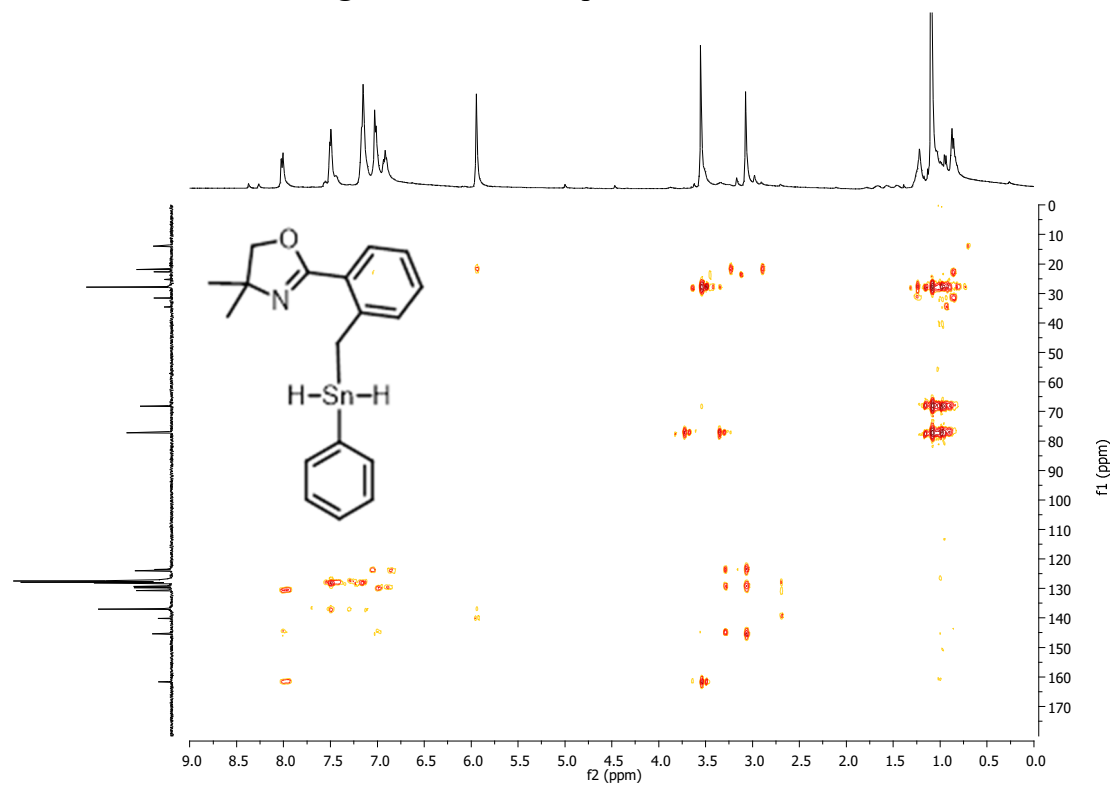

**Figure S54:** HMBC spectrum of **13** in  $C_6D_6$ .

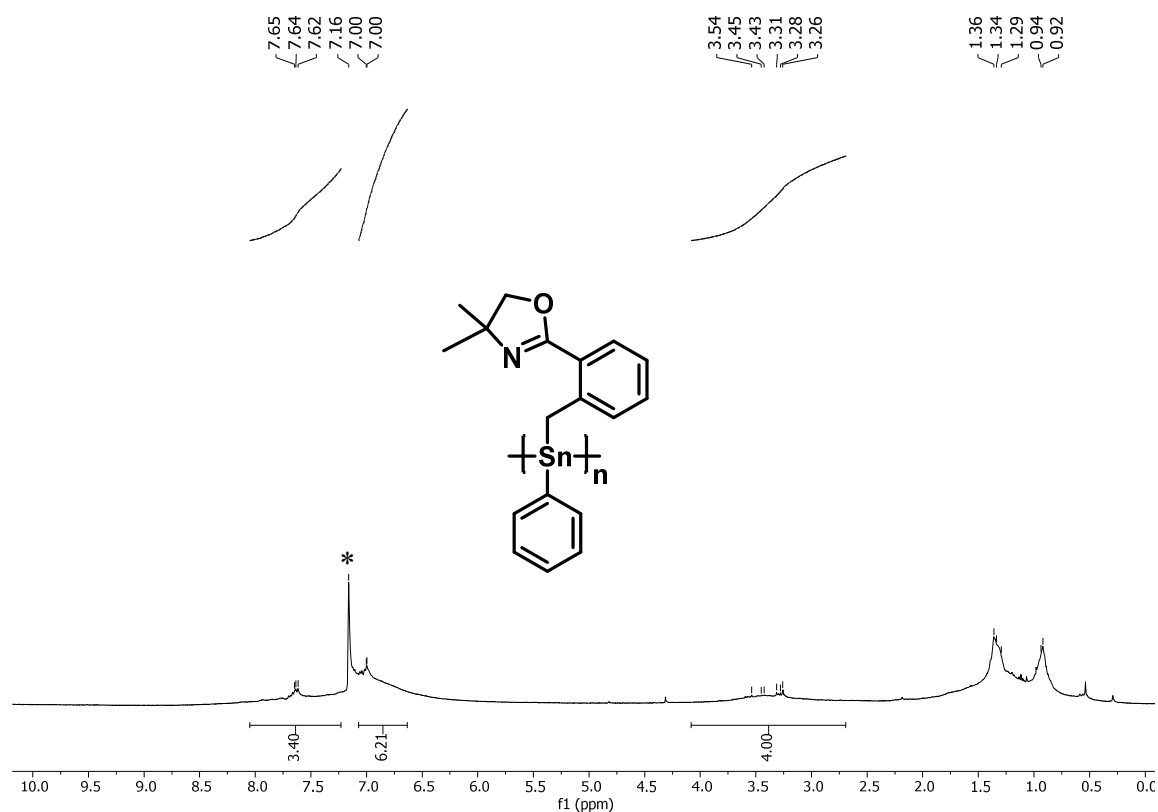

Figure S55:  $^1\text{H}$  NMR spectrum of **15** in  $\text{C}_6\text{D}_6^*$ .

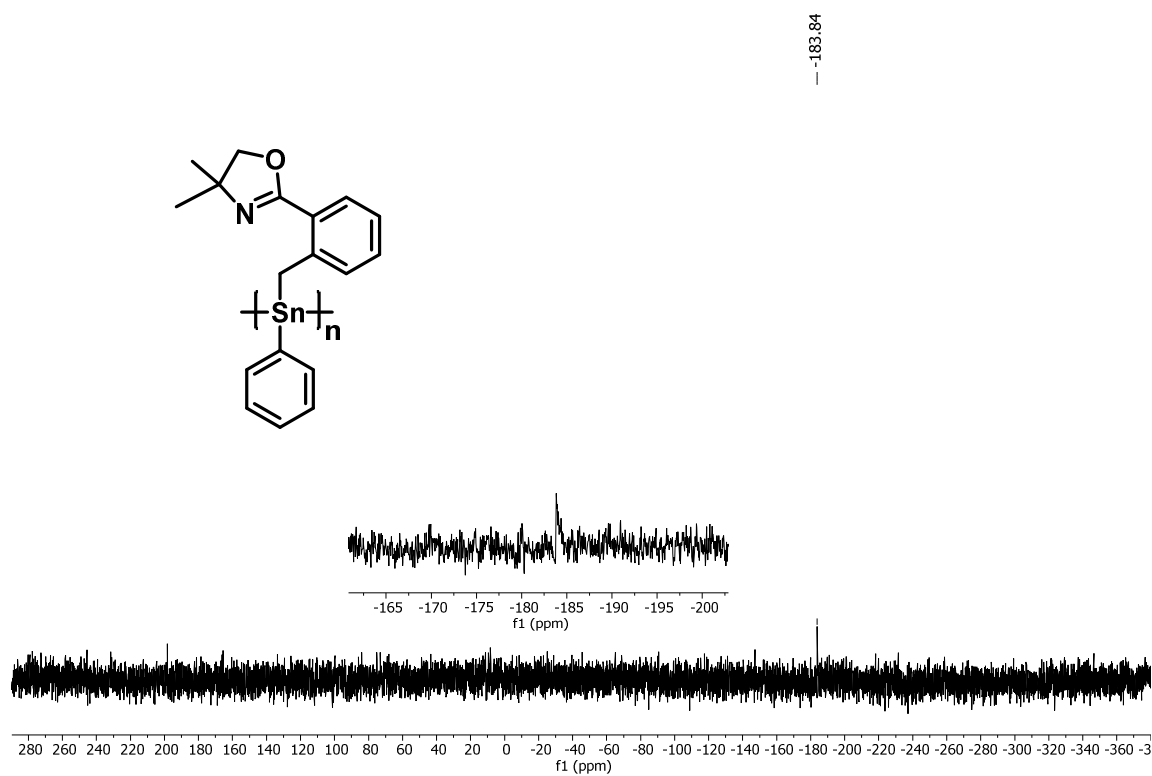

Figure S56:  $^{119}\text{Sn}$  NMR spectrum of **15** in  $\text{C}_6\text{D}_6$ .

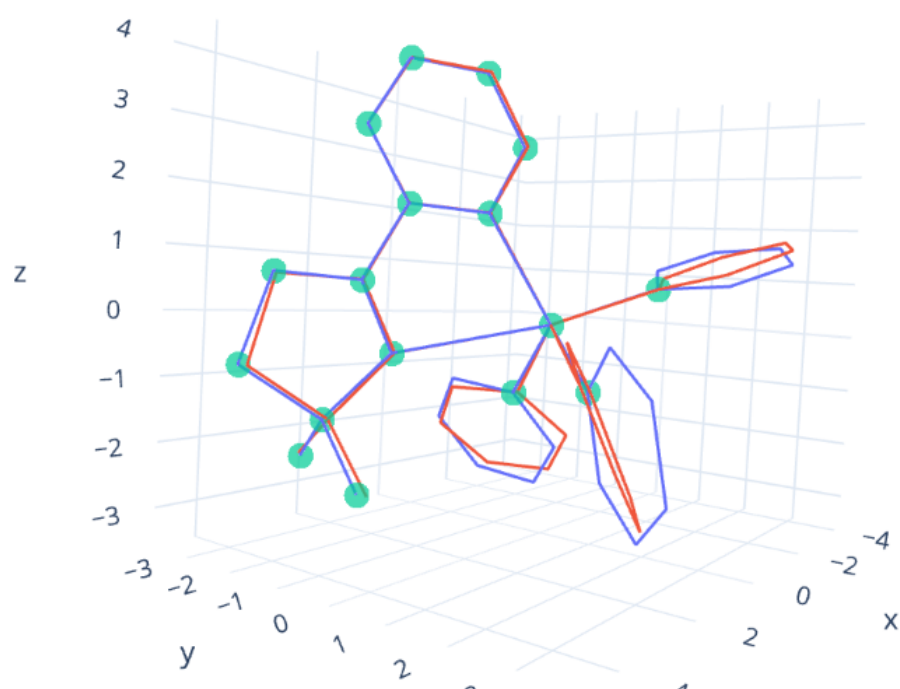

**Figure S57:** Overlay of coordinate traces for experimental (blue) and PBE0-GD3BJ (red) data for Compound 7. Green points are coordinates used in calculation and minimization of MSSD.

**Table S1.** B3PW91-GD3BJ calculated bond lengths and differences for Compound **4'**

| Calculated Bond Length (Å) |      |        | Differences in Bond Length<br>(Calc. – Exp.) |
|----------------------------|------|--------|----------------------------------------------|
| Sn1A                       | C25A | 2.1357 | 0.0074                                       |
| Sn1A                       | C19A | 2.1343 | 0.0155                                       |
| Sn1A                       | C13A | 2.1571 | 0.0012                                       |
| Sn1A                       | C1A  | 2.1631 | -0.0011                                      |
| O1A                        | C8A  | 1.3600 | 0.0075                                       |
| O1A                        | C9A  | 1.4403 | 0.0003                                       |
| N1A                        | C8A  | 1.2832 | -0.0088                                      |
| N1A                        | C10A | 1.4765 | 0.0076                                       |
| C1A                        | C2A  | 1.4863 | 0.0048                                       |
| C2A                        | C3A  | 1.4034 | -0.0068                                      |
| C2A                        | C7A  | 1.4166 | 0.0012                                       |
| C3A                        | C4A  | 1.3906 | -0.0226                                      |
| C4A                        | C5A  | 1.3960 | 0.0045                                       |
| C5A                        | C6A  | 1.3886 | -0.0051                                      |
| C6A                        | C7A  | 1.4040 | -0.0117                                      |
| C7A                        | C8A  | 1.4644 | 0.0082                                       |
| C9A                        | C10A | 1.5509 | -0.0191                                      |
| C10A                       | C11A | 1.5257 | -0.0073                                      |
| C10A                       | C12A | 1.5294 | -0.0070                                      |
| C13A                       | C18A | 1.4025 | -0.0104                                      |
| C13A                       | C14A | 1.4031 | -0.0069                                      |
| C14A                       | C15A | 1.3960 | -0.0160                                      |
| C15A                       | C16A | 1.3958 | -0.0206                                      |
| C16A                       | C17A | 1.3954 | -0.0318                                      |
| C17A                       | C18A | 1.3966 | -0.0025                                      |
| C19A                       | C20A | 1.4019 | -0.0189                                      |
| C19A                       | C24A | 1.4016 | -0.0063                                      |
| C20A                       | C21A | 1.3959 | -0.0130                                      |
| C21A                       | C22A | 1.3953 | -0.0184                                      |
| C22A                       | C23A | 1.3955 | -0.0132                                      |
| C23A                       | C24A | 1.3960 | -0.0034                                      |
| C25A                       | C30A | 1.4013 | -0.0123                                      |
| C25A                       | C26A | 1.4035 | -0.0089                                      |
| C26A                       | C27A | 1.3960 | -0.0081                                      |
| C27A                       | C28A | 1.3948 | -0.0144                                      |
| C28A                       | C29A | 1.3954 | -0.0135                                      |
| C29A                       | C30A | 1.3954 | -0.0032                                      |
| Sn1A                       | N1A  | 2.8175 | 0.3581                                       |

**Table S2.** B3PW91-GD3BJ calculated bond angles and differences for Compound 4'

| Calculated Bond Angle (°) |      |      | Differences in Bond Length<br>(Calc. – Exp.) |      |
|---------------------------|------|------|----------------------------------------------|------|
| C25A                      | Sn1A | C19A | 114.0                                        | -3.7 |
| C25A                      | Sn1A | C13A | 100.7                                        | 4.1  |
| C19A                      | Sn1A | C13A | 102.9                                        | 5.4  |
| C25A                      | Sn1A | C1A  | 121.0                                        | -5.5 |
| C19A                      | Sn1A | C1A  | 110.7                                        | 2.8  |
| C13A                      | Sn1A | C1A  | 104.8                                        | -1.2 |
| C8A                       | O1A  | C9A  | 106.3                                        | -1.1 |
| C8A                       | N1A  | C10A | 108.0                                        | -1.0 |
| C2A                       | C1A  | Sn1A | 114.1                                        | -4.2 |
| C3A                       | C2A  | C7A  | 117.3                                        | -0.3 |
| C3A                       | C2A  | C1A  | 119.4                                        | -0.2 |
| C7A                       | C2A  | C1A  | 123.3                                        | 0.5  |
| C4A                       | C3A  | C2A  | 122.0                                        | 0.9  |
| C3A                       | C4A  | C5A  | 120.1                                        | -0.3 |
| C6A                       | C5A  | C4A  | 119.2                                        | -0.5 |
| C5A                       | C6A  | C7A  | 120.9                                        | 0.7  |
| C6A                       | C7A  | C2A  | 120.4                                        | -0.5 |
| C6A                       | C7A  | C8A  | 118.1                                        | 0.6  |
| C2A                       | C7A  | C8A  | 121.4                                        | -0.1 |
| N1A                       | C8A  | O1A  | 117.1                                        | 0.4  |
| N1A                       | C8A  | C7A  | 126.7                                        | 0.9  |
| O1A                       | C8A  | C7A  | 116.0                                        | -1.2 |
| O1A                       | C9A  | C10A | 104.7                                        | -0.2 |
| N1A                       | C10A | C11A | 110.6                                        | -1.8 |
| N1A                       | C10A | C12A | 108.9                                        | 0.1  |
| C11A                      | C10A | C12A | 110.9                                        | 0.1  |
| N1A                       | C10A | C9A  | 102.7                                        | 0.3  |
| C11A                      | C10A | C9A  | 111.8                                        | 0.6  |
| C12A                      | C10A | C9A  | 111.6                                        | 0.7  |
| C18A                      | C13A | C14A | 118.0                                        | -0.1 |
| C18A                      | C13A | Sn1A | 121.2                                        | 0.3  |
| C14A                      | C13A | Sn1A | 120.8                                        | -0.2 |
| C15A                      | C14A | C13A | 121.2                                        | 0.2  |
| C16A                      | C15A | C14A | 120.0                                        | -0.1 |
| C17A                      | C16A | C15A | 119.7                                        | 0.3  |
| C16A                      | C17A | C18A | 120.0                                        | 0.9  |
| C13A                      | C18A | C17A | 121.2                                        | -1.1 |
| C20A                      | C19A | C24A | 118.1                                        | 0.1  |
| C20A                      | C19A | Sn1A | 120.3                                        | 2.1  |
| C24A                      | C19A | Sn1A | 121.6                                        | -2.2 |
| C21A                      | C20A | C19A | 121.2                                        | -0.3 |
| C22A                      | C21A | C20A | 120.0                                        | 0.7  |
| C21A                      | C22A | C23A | 119.7                                        | -0.1 |
| C22A                      | C23A | C24A | 120.0                                        | -0.3 |
| C23A                      | C24A | C19A | 121.1                                        | -0.2 |

|      |      |      |       |      |
|------|------|------|-------|------|
| C30A | C25A | C26A | 118.1 | -0.3 |
| C30A | C25A | Sn1A | 125.5 | -3.1 |
| C26A | C25A | Sn1A | 116.4 | 3.4  |
| C27A | C26A | C25A | 121.2 | 0.0  |
| C28A | C27A | C26A | 119.9 | 0.2  |
| C27A | C28A | C29A | 119.6 | 0.0  |
| C28A | C29A | C30A | 120.2 | -0.1 |
| C25A | C30A | C29A | 121.0 | 0.2  |



**Table S3.** PBE0-GD3BJ calculated bond lengths and differences for Compound 4'

| Calculated Bond Length (Å) |      |        | Differences in Bond Length<br>(Calc. – Exp.) |
|----------------------------|------|--------|----------------------------------------------|
| Sn1A                       | C25A | 2.1409 | 0.002                                        |
| Sn1A                       | C19A | 2.1391 | 0.011                                        |
| Sn1A                       | C13A | 2.1614 | -0.003                                       |
| Sn1A                       | C1A  | 2.1656 | -0.004                                       |
| O1A                        | C8A  | 1.3563 | 0.011                                        |
| O1A                        | C9A  | 1.4351 | 0.006                                        |
| N1A                        | C8A  | 1.2813 | -0.007                                       |
| N1A                        | C10A | 1.4735 | 0.011                                        |
| C1A                        | C2A  | 1.4857 | 0.005                                        |
| C2A                        | C3A  | 1.4024 | -0.006                                       |
| C2A                        | C7A  | 1.4147 | 0.003                                        |
| C3A                        | C4A  | 1.3894 | -0.021                                       |
| C4A                        | C5A  | 1.3946 | 0.006                                        |
| C5A                        | C6A  | 1.3875 | -0.004                                       |
| C6A                        | C7A  | 1.4026 | -0.010                                       |
| C7A                        | C8A  | 1.4646 | 0.008                                        |
| C9A                        | C10A | 1.5484 | -0.017                                       |
| C10A                       | C11A | 1.5242 | -0.006                                       |
| C10A                       | C12A | 1.5276 | -0.005                                       |
| C13A                       | C18A | 1.4015 | -0.009                                       |
| C13A                       | C14A | 1.4022 | -0.006                                       |
| C14A                       | C15A | 1.3948 | -0.015                                       |
| C15A                       | C16A | 1.3944 | -0.019                                       |
| C16A                       | C17A | 1.3938 | -0.030                                       |
| C17A                       | C18A | 1.3955 | -0.001                                       |
| C19A                       | C20A | 1.4010 | -0.018                                       |
| C19A                       | C24A | 1.4008 | -0.005                                       |
| C20A                       | C21A | 1.3949 | -0.012                                       |
| C21A                       | C22A | 1.3939 | -0.017                                       |
| C22A                       | C23A | 1.3941 | -0.012                                       |
| C23A                       | C24A | 1.3950 | -0.002                                       |
| C25A                       | C30A | 1.4004 | -0.011                                       |
| C25A                       | C26A | 1.4026 | -0.008                                       |
| C26A                       | C27A | 1.3950 | -0.007                                       |
| C27A                       | C28A | 1.3933 | -0.013                                       |
| C28A                       | C29A | 1.3940 | -0.012                                       |
| C29A                       | C30A | 1.3944 | -0.002                                       |
| Sn1A                       | N1A  | 2.8619 | 0.314                                        |

**Table S4.** PBE0-GD3BJ calculated bond angles and differences for Compound 4'

| Calculated Bond Angle (°) |      |      | Differences in Bond Length<br>(Calc. – Exp.) |      |
|---------------------------|------|------|----------------------------------------------|------|
| C25A                      | Sn1A | C19A | 114.0                                        | -3.4 |
| C25A                      | Sn1A | C13A | 100.7                                        | 3.8  |
| C19A                      | Sn1A | C13A | 102.9                                        | 5.2  |
| C25A                      | Sn1A | C1A  | 121.0                                        | -5.7 |
| C19A                      | Sn1A | C1A  | 110.7                                        | 2.8  |
| C13A                      | Sn1A | C1A  | 104.8                                        | -0.8 |
| C8A                       | O1A  | C9A  | 106.3                                        | -1.1 |
| C8A                       | N1A  | C10A | 108.0                                        | -0.8 |
| C2A                       | C1A  | Sn1A | 114.1                                        | -4.9 |
| C3A                       | C2A  | C7A  | 117.3                                        | -0.3 |
| C3A                       | C2A  | C1A  | 119.4                                        | -0.2 |
| C7A                       | C2A  | C1A  | 123.3                                        | 0.4  |
| C4A                       | C3A  | C2A  | 122.0                                        | 0.9  |
| C3A                       | C4A  | C5A  | 120.1                                        | -0.3 |
| C6A                       | C5A  | C4A  | 119.2                                        | -0.5 |
| C5A                       | C6A  | C7A  | 120.9                                        | 0.6  |
| C6A                       | C7A  | C2A  | 120.4                                        | -0.5 |
| C6A                       | C7A  | C8A  | 118.1                                        | 0.6  |
| C2A                       | C7A  | C8A  | 121.4                                        | -0.1 |
| N1A                       | C8A  | O1A  | 117.1                                        | 0.2  |
| N1A                       | C8A  | C7A  | 126.7                                        | 0.9  |
| O1A                       | C8A  | C7A  | 116.0                                        | -1.0 |
| O1A                       | C9A  | C10A | 104.7                                        | -0.2 |
| N1A                       | C10A | C11A | 110.6                                        | -1.8 |
| N1A                       | C10A | C12A | 108.9                                        | -0.1 |
| C11A                      | C10A | C12A | 110.9                                        | 0.2  |
| N1A                       | C10A | C9A  | 102.7                                        | 0.2  |
| C11A                      | C10A | C9A  | 111.8                                        | 0.7  |
| C12A                      | C10A | C9A  | 111.6                                        | 0.7  |
| C18A                      | C13A | C14A | 118.0                                        | 0.0  |
| C18A                      | C13A | Sn1A | 121.2                                        | 0.2  |
| C14A                      | C13A | Sn1A | 120.8                                        | -0.2 |
| C15A                      | C14A | C13A | 121.2                                        | 0.1  |
| C16A                      | C15A | C14A | 120.0                                        | -0.1 |
| C17A                      | C16A | C15A | 119.7                                        | 0.3  |
| C16A                      | C17A | C18A | 120.0                                        | 0.9  |
| C13A                      | C18A | C17A | 121.2                                        | -1.2 |
| C20A                      | C19A | C24A | 118.1                                        | 0.2  |
| C20A                      | C19A | Sn1A | 120.3                                        | 2.0  |
| C24A                      | C19A | Sn1A | 121.6                                        | -2.1 |
| C21A                      | C20A | C19A | 121.2                                        | -0.3 |
| C22A                      | C21A | C20A | 120.0                                        | 0.7  |
| C21A                      | C22A | C23A | 119.7                                        | -0.1 |
| C22A                      | C23A | C24A | 120.0                                        | -0.3 |
| C23A                      | C24A | C19A | 121.1                                        | -0.2 |

|      |      |      |       |      |
|------|------|------|-------|------|
| C30A | C25A | C26A | 118.1 | -0.3 |
| C30A | C25A | Sn1A | 125.5 | -3.2 |
| C26A | C25A | Sn1A | 116.4 | 3.5  |
| C27A | C26A | C25A | 121.2 | 0.0  |
| C28A | C27A | C26A | 119.9 | 0.2  |
| C27A | C28A | C29A | 119.6 | 0.0  |
| C28A | C29A | C30A | 120.2 | -0.1 |
| C25A | C30A | C29A | 121.0 | 0.2  |

**Table S5.** M05-2X-GD3 calculated bond lengths and differences for Compound 4'

| Calculated Bond Length (Å) |      |        | Differences in Bond Length<br>(Calc. – Exp.) |
|----------------------------|------|--------|----------------------------------------------|
| Sn1A                       | C25A | 2.1335 | 0.010                                        |
| Sn1A                       | C19A | 2.1306 | 0.019                                        |
| Sn1A                       | C13A | 2.1506 | 0.008                                        |
| Sn1A                       | C1A  | 2.1576 | 0.004                                        |
| O1A                        | C8A  | 1.3614 | 0.006                                        |
| O1A                        | C9A  | 1.4416 | -0.001                                       |
| N1A                        | C8A  | 1.2764 | -0.002                                       |
| N1A                        | C10A | 1.4770 | 0.007                                        |
| C1A                        | C2A  | 1.4918 | -0.001                                       |
| C2A                        | C3A  | 1.4022 | -0.006                                       |
| C2A                        | C7A  | 1.4114 | 0.006                                        |
| C3A                        | C4A  | 1.3893 | -0.021                                       |
| C4A                        | C5A  | 1.3944 | 0.006                                        |
| C5A                        | C6A  | 1.3877 | -0.004                                       |
| C6A                        | C7A  | 1.4011 | -0.009                                       |
| C7A                        | C8A  | 1.4701 | 0.003                                        |
| C9A                        | C10A | 1.5444 | -0.013                                       |
| C10A                       | C11A | 1.5243 | -0.006                                       |
| C10A                       | C12A | 1.5296 | -0.007                                       |
| C13A                       | C18A | 1.4006 | -0.008                                       |
| C13A                       | C14A | 1.4023 | -0.006                                       |
| C14A                       | C15A | 1.3943 | -0.014                                       |
| C15A                       | C16A | 1.3944 | -0.019                                       |
| C16A                       | C17A | 1.3931 | -0.029                                       |
| C17A                       | C18A | 1.3958 | -0.002                                       |
| C19A                       | C20A | 1.4007 | -0.018                                       |
| C19A                       | C24A | 1.4004 | -0.005                                       |
| C20A                       | C21A | 1.3948 | -0.012                                       |
| C21A                       | C22A | 1.3940 | -0.017                                       |
| C22A                       | C23A | 1.3939 | -0.012                                       |
| C23A                       | C24A | 1.3953 | -0.003                                       |
| C25A                       | C30A | 1.4002 | -0.011                                       |
| C25A                       | C26A | 1.4027 | -0.008                                       |
| C26A                       | C27A | 1.3948 | -0.007                                       |
| C27A                       | C28A | 1.3929 | -0.013                                       |
| C28A                       | C29A | 1.3935 | -0.012                                       |
| C29A                       | C30A | 1.3943 | -0.002                                       |
| Sn1A                       | N1A  | 2.9590 | 0.217                                        |

**Table S6.** M05-2X-GD3 calculated bond angles and differences for Compound 4'

| Calculated Bond Angle (°) |      |      | Differences in Bond Length<br>(Calc. – Exp.) |      |
|---------------------------|------|------|----------------------------------------------|------|
| C25A                      | Sn1A | C19A | 112.5                                        | -2.1 |
| C25A                      | Sn1A | C13A | 101.7                                        | 3.1  |
| C19A                      | Sn1A | C13A | 104.1                                        | 4.2  |
| C25A                      | Sn1A | C1A  | 120.5                                        | -5.0 |
| C19A                      | Sn1A | C1A  | 111.3                                        | 2.2  |
| C13A                      | Sn1A | C1A  | 104.6                                        | -1.0 |
| C8A                       | O1A  | C9A  | 105.8                                        | -0.6 |
| C8A                       | N1A  | C10A | 107.6                                        | -0.5 |
| C2A                       | C1A  | Sn1A | 114.5                                        | -4.6 |
| C3A                       | C2A  | C7A  | 117.3                                        | -0.2 |
| C3A                       | C2A  | C1A  | 119.2                                        | 0.0  |
| C7A                       | C2A  | C1A  | 123.6                                        | 0.2  |
| C4A                       | C3A  | C2A  | 121.9                                        | 0.9  |
| C3A                       | C4A  | C5A  | 120.2                                        | -0.3 |
| C6A                       | C5A  | C4A  | 119.1                                        | -0.5 |
| C5A                       | C6A  | C7A  | 120.8                                        | 0.8  |
| C6A                       | C7A  | C2A  | 120.7                                        | -0.8 |
| C6A                       | C7A  | C8A  | 117.9                                        | 0.8  |
| C2A                       | C7A  | C8A  | 121.4                                        | 0.0  |
| N1A                       | C8A  | O1A  | 117.3                                        | 0.3  |
| N1A                       | C8A  | C7A  | 126.7                                        | 0.9  |
| O1A                       | C8A  | C7A  | 115.9                                        | -1.1 |
| O1A                       | C9A  | C10A | 104.1                                        | 0.4  |
| N1A                       | C10A | C11A | 111.0                                        | -2.2 |
| N1A                       | C10A | C12A | 108.4                                        | 0.5  |
| C11A                      | C10A | C12A | 110.9                                        | 0.0  |
| N1A                       | C10A | C9A  | 102.6                                        | 0.4  |
| C11A                      | C10A | C9A  | 112.0                                        | 0.5  |
| C12A                      | C10A | C9A  | 111.6                                        | 0.7  |
| C18A                      | C13A | C14A | 117.9                                        | -0.1 |
| C18A                      | C13A | Sn1A | 121.7                                        | -0.1 |
| C14A                      | C13A | Sn1A | 120.4                                        | 0.2  |
| C15A                      | C14A | C13A | 121.3                                        | 0.1  |
| C16A                      | C15A | C14A | 119.9                                        | -0.1 |
| C17A                      | C16A | C15A | 119.8                                        | 0.2  |
| C16A                      | C17A | C18A | 120.0                                        | 0.9  |
| C13A                      | C18A | C17A | 121.2                                        | -1.1 |
| C20A                      | C19A | C24A | 118.1                                        | 0.1  |
| C20A                      | C19A | Sn1A | 120.7                                        | 1.7  |
| C24A                      | C19A | Sn1A | 121.2                                        | -1.8 |
| C21A                      | C20A | C19A | 121.2                                        | -0.2 |
| C22A                      | C21A | C20A | 119.9                                        | 0.7  |
| C21A                      | C22A | C23A | 119.7                                        | -0.2 |
| C22A                      | C23A | C24A | 120.0                                        | -0.3 |
| C23A                      | C24A | C19A | 121.1                                        | -0.1 |

|      |      |      |       |      |
|------|------|------|-------|------|
| C30A | C25A | C26A | 118.0 | -0.2 |
| C30A | C25A | Sn1A | 126.2 | -3.8 |
| C26A | C25A | Sn1A | 115.8 | 4.0  |
| C27A | C26A | C25A | 121.3 | 0.0  |
| C28A | C27A | C26A | 119.9 | 0.3  |
| C27A | C28A | C29A | 119.7 | -0.1 |
| C28A | C29A | C30A | 120.2 | -0.1 |
| C25A | C30A | C29A | 121.0 | 0.2  |

**Table S7.** B3PW91-GD3BJ calculated bond lengths and differences for Compound 4”

| Calculated Bond Length (Å) |      |        | Differences in Bond Length<br>(Calc. – Exp.) |
|----------------------------|------|--------|----------------------------------------------|
| Sn1B                       | C19B | 2.1343 | 0.0048                                       |
| Sn1B                       | C25B | 2.1357 | 0.0081                                       |
| Sn1B                       | C1B  | 2.1631 | -0.0099                                      |
| Sn1B                       | C13B | 2.1571 | -0.0031                                      |
| O1B                        | C8B  | 1.3600 | 0.0148                                       |
| O1B                        | C9B  | 1.4403 | 0.0052                                       |
| N1B                        | C8B  | 1.2832 | -0.0157                                      |
| N1B                        | C10B | 1.4765 | 0.0067                                       |
| C1B                        | C2B  | 1.4863 | 0.0139                                       |
| C2B                        | C3B  | 1.4034 | -0.0067                                      |
| C2B                        | C7B  | 1.4166 | 0.0042                                       |
| C3B                        | C4B  | 1.3906 | -0.0115                                      |
| C4B                        | C5B  | 1.3960 | -0.0196                                      |
| C5B                        | C6B  | 1.3886 | -0.0074                                      |
| C6B                        | C7B  | 1.4040 | -0.0146                                      |
| C7B                        | C8B  | 1.4644 | 0.0034                                       |
| C9B                        | C10B | 1.5509 | -0.0082                                      |
| C10B                       | C12B | 1.5294 | -0.0107                                      |
| C10B                       | C11B | 1.5257 | -0.0010                                      |
| C13B                       | C14B | 1.4031 | -0.0154                                      |
| C13B                       | C18B | 1.4025 | -0.0018                                      |
| C14B                       | C15B | 1.3960 | -0.0015                                      |
| C15B                       | C16B | 1.3958 | -0.0368                                      |
| C16B                       | C17B | 1.3954 | -0.0088                                      |
| C17B                       | C18B | 1.3966 | -0.0114                                      |
| C19B                       | C20B | 1.4019 | -0.0159                                      |
| C19B                       | C24B | 1.4016 | -0.0072                                      |
| C20B                       | C21B | 1.3959 | -0.0031                                      |
| C21B                       | C22B | 1.3953 | -0.0244                                      |
| C22B                       | C23B | 1.3955 | -0.0165                                      |
| C23B                       | C24B | 1.3960 | -0.0046                                      |
| C25B                       | C30B | 1.4013 | -0.0093                                      |
| C25B                       | C26B | 1.4035 | -0.0037                                      |
| C26B                       | C27B | 1.3960 | -0.0142                                      |
| C27B                       | C28B | 1.3948 | -0.0141                                      |
| C28B                       | C29B | 1.3954 | -0.0120                                      |
| C29B                       | C30B | 1.3954 | -0.0082                                      |
| Sn1B                       | N1B  | 2.8175 | 0.4167                                       |

**Table S8.** B3PW91-GD3BJ calculated bond angles and differences for Compound 4”

| Calculated Bond Angle (°) |      |      | Differences in Bond Length<br>(Calc. – Exp.) |      |
|---------------------------|------|------|----------------------------------------------|------|
| C19B                      | Sn1B | C25B | 114.0                                        | -3.6 |
| C19B                      | Sn1B | C1B  | 110.7                                        | 1.4  |
| C25B                      | Sn1B | C1B  | 121.0                                        | -4.9 |
| C19B                      | Sn1B | C13B | 102.9                                        | 5.6  |
| C25B                      | Sn1B | C13B | 100.7                                        | 5.1  |
| C1B                       | Sn1B | C13B | 104.8                                        | -1.5 |
| C8B                       | O1B  | C9B  | 106.3                                        | -0.9 |
| C8B                       | N1B  | C10B | 108.0                                        | -0.4 |
| C2B                       | C1B  | Sn1B | 114.1                                        | -3.1 |
| C3B                       | C2B  | C7B  | 117.3                                        | -0.4 |
| C3B                       | C2B  | C1B  | 119.4                                        | -0.3 |
| C7B                       | C2B  | C1B  | 123.3                                        | 0.6  |
| C4B                       | C3B  | C2B  | 122.0                                        | 0.1  |
| C5B                       | C4B  | C3B  | 120.1                                        | 0.5  |
| C4B                       | C5B  | C6B  | 119.2                                        | -0.3 |
| C5B                       | C6B  | C7B  | 120.9                                        | 0.7  |
| C6B                       | C7B  | C2B  | 120.4                                        | -0.5 |
| C6B                       | C7B  | C8B  | 118.1                                        | 1.0  |
| C2B                       | C7B  | C8B  | 121.4                                        | -0.4 |
| N1B                       | C8B  | O1B  | 117.1                                        | 0.6  |
| N1B                       | C8B  | C7B  | 126.7                                        | 1.6  |
| O1B                       | C8B  | C7B  | 116.0                                        | -2.1 |
| O1B                       | C9B  | C10B | 104.7                                        | -0.1 |
| N1B                       | C10B | C12B | 108.9                                        | 0.3  |
| N1B                       | C10B | C11B | 110.6                                        | -1.4 |
| C12B                      | C10B | C11B | 110.9                                        | -0.1 |
| N1B                       | C10B | C9B  | 102.7                                        | 0.4  |
| C12B                      | C10B | C9B  | 111.6                                        | 0.9  |
| C11B                      | C10B | C9B  | 111.8                                        | 0.0  |
| C14B                      | C13B | C18B | 118.0                                        | -0.3 |
| C14B                      | C13B | Sn1B | 120.8                                        | 0.7  |
| C18B                      | C13B | Sn1B | 121.2                                        | -0.3 |
| C13B                      | C14B | C15B | 121.2                                        | 0.0  |
| C16B                      | C15B | C14B | 120.0                                        | 0.0  |
| C15B                      | C16B | C17B | 119.7                                        | 0.8  |
| C18B                      | C17B | C16B | 120.0                                        | -0.4 |
| C17B                      | C18B | C13B | 121.2                                        | -0.1 |
| C20B                      | C19B | C24B | 118.1                                        | 0.0  |
| C20B                      | C19B | Sn1B | 120.3                                        | 1.5  |
| C24B                      | C19B | Sn1B | 121.6                                        | -1.5 |
| C19B                      | C20B | C21B | 121.2                                        | 0.2  |
| C22B                      | C21B | C20B | 120.0                                        | -0.1 |
| C21B                      | C22B | C23B | 119.7                                        | 0.2  |
| C22B                      | C23B | C24B | 120.0                                        | 0.4  |
| C23B                      | C24B | C19B | 121.1                                        | -0.7 |



|      |      |      |       |      |
|------|------|------|-------|------|
| C30B | C25B | C26B | 118.1 | -0.6 |
| C30B | C25B | Sn1B | 125.5 | -3.3 |
| C26B | C25B | Sn1B | 116.4 | 3.9  |
| C27B | C26B | C25B | 121.2 | 0.2  |
| C28B | C27B | C26B | 119.9 | 0.1  |
| C27B | C28B | C29B | 119.6 | 0.2  |
| C28B | C29B | C30B | 120.2 | -0.2 |
| C29B | C30B | C25B | 121.0 | 0.3  |

**Table S9.** PBE0-GD3BJ calculated bond lengths and differences for Compound 4”

| Calculated Bond Length (Å) |      |        | Differences in Bond Length<br>(Calc. – Exp.) |
|----------------------------|------|--------|----------------------------------------------|
| Sn1B                       | C19B | 2.1391 | -0.0001                                      |
| Sn1B                       | C25B | 2.1409 | 0.0030                                       |
| Sn1B                       | C1B  | 2.1656 | -0.0123                                      |
| Sn1B                       | C13B | 2.1614 | -0.0074                                      |
| O1B                        | C8B  | 1.3563 | 0.0185                                       |
| O1B                        | C9B  | 1.4351 | 0.0104                                       |
| N1B                        | C8B  | 1.2813 | -0.0138                                      |
| N1B                        | C10B | 1.4735 | 0.0097                                       |
| C1B                        | C2B  | 1.4857 | 0.0145                                       |
| C2B                        | C3B  | 1.4024 | -0.0058                                      |
| C2B                        | C7B  | 1.4147 | 0.0060                                       |
| C3B                        | C4B  | 1.3894 | -0.0103                                      |
| C4B                        | C5B  | 1.3946 | -0.0182                                      |
| C5B                        | C6B  | 1.3875 | -0.0063                                      |
| C6B                        | C7B  | 1.4026 | -0.0131                                      |
| C7B                        | C8B  | 1.4646 | 0.0032                                       |
| C9B                        | C10B | 1.5484 | -0.0058                                      |
| C10B                       | C12B | 1.5276 | -0.0089                                      |
| C10B                       | C11B | 1.5242 | 0.0005                                       |
| C13B                       | C14B | 1.4022 | -0.0145                                      |
| C13B                       | C18B | 1.4015 | -0.0007                                      |
| C14B                       | C15B | 1.3948 | -0.0003                                      |
| C15B                       | C16B | 1.3944 | -0.0354                                      |
| C16B                       | C17B | 1.3938 | -0.0072                                      |
| C17B                       | C18B | 1.3955 | -0.0104                                      |
| C19B                       | C20B | 1.4010 | -0.0150                                      |
| C19B                       | C24B | 1.4008 | -0.0063                                      |
| C20B                       | C21B | 1.3949 | -0.0021                                      |
| C21B                       | C22B | 1.3939 | -0.0230                                      |
| C22B                       | C23B | 1.3941 | -0.0151                                      |
| C23B                       | C24B | 1.3950 | -0.0036                                      |
| C25B                       | C30B | 1.4004 | -0.0084                                      |
| C25B                       | C26B | 1.4026 | -0.0028                                      |
| C26B                       | C27B | 1.3950 | -0.0131                                      |
| C27B                       | C28B | 1.3933 | -0.0126                                      |
| C28B                       | C29B | 1.3940 | -0.0105                                      |
| C29B                       | C30B | 1.3944 | -0.0073                                      |
| Sn1B                       | N1B  | 2.8619 | 0.3723                                       |

**Table S10.** PBE0-GD3BJ calculated bond angles and differences for Compound 4”

| Calculated Bond Angle (°) |      |      | Differences in Bond Length<br>(Calc. – Exp.) |      |
|---------------------------|------|------|----------------------------------------------|------|
| C19B                      | Sn1B | C25B | 113.7                                        | -3.3 |
| C19B                      | Sn1B | C1B  | 110.7                                        | 1.4  |
| C25B                      | Sn1B | C1B  | 121.2                                        | -5.1 |
| C19B                      | Sn1B | C13B | 103.1                                        | 5.4  |
| C25B                      | Sn1B | C13B | 101.0                                        | 4.8  |
| C1B                       | Sn1B | C13B | 104.4                                        | -1.1 |
| C8B                       | O1B  | C9B  | 106.3                                        | -0.9 |
| C8B                       | N1B  | C10B | 107.9                                        | -0.2 |
| C2B                       | C1B  | Sn1B | 114.8                                        | -3.8 |
| C3B                       | C2B  | C7B  | 117.3                                        | -0.3 |
| C3B                       | C2B  | C1B  | 119.4                                        | -0.3 |
| C7B                       | C2B  | C1B  | 123.3                                        | 0.6  |
| C4B                       | C3B  | C2B  | 122.0                                        | 0.1  |
| C5B                       | C4B  | C3B  | 120.2                                        | 0.5  |
| C4B                       | C5B  | C6B  | 119.1                                        | -0.3 |
| C5B                       | C6B  | C7B  | 121.0                                        | 0.7  |
| C6B                       | C7B  | C2B  | 120.4                                        | -0.6 |
| C6B                       | C7B  | C8B  | 118.0                                        | 1.1  |
| C2B                       | C7B  | C8B  | 121.5                                        | -0.4 |
| N1B                       | C8B  | O1B  | 117.3                                        | 0.4  |
| N1B                       | C8B  | C7B  | 126.7                                        | 1.6  |
| O1B                       | C8B  | C7B  | 115.8                                        | -2.0 |
| O1B                       | C9B  | C10B | 104.8                                        | -0.1 |
| N1B                       | C10B | C12B | 109.0                                        | 0.2  |
| N1B                       | C10B | C11B | 110.6                                        | -1.4 |
| C12B                      | C10B | C11B | 110.8                                        | -0.1 |
| N1B                       | C10B | C9B  | 102.7                                        | 0.3  |
| C12B                      | C10B | C9B  | 111.6                                        | 0.9  |
| C11B                      | C10B | C9B  | 111.8                                        | 0.1  |
| C14B                      | C13B | C18B | 117.9                                        | -0.3 |
| C14B                      | C13B | Sn1B | 120.8                                        | 0.7  |
| C18B                      | C13B | Sn1B | 121.3                                        | -0.4 |
| C13B                      | C14B | C15B | 121.2                                        | 0.0  |
| C16B                      | C15B | C14B | 120.0                                        | 0.0  |
| C15B                      | C16B | C17B | 119.7                                        | 0.8  |
| C18B                      | C17B | C16B | 120.0                                        | -0.4 |
| C17B                      | C18B | C13B | 121.2                                        | -0.2 |
| C20B                      | C19B | C24B | 118.0                                        | 0.0  |
| C20B                      | C19B | Sn1B | 120.4                                        | 1.4  |
| C24B                      | C19B | Sn1B | 121.6                                        | -1.4 |
| C19B                      | C20B | C21B | 121.2                                        | 0.1  |
| C22B                      | C21B | C20B | 120.0                                        | -0.1 |
| C21B                      | C22B | C23B | 119.7                                        | 0.2  |
| C22B                      | C23B | C24B | 120.0                                        | 0.4  |
| C23B                      | C24B | C19B | 121.1                                        | -0.7 |

|      |      |      |       |      |
|------|------|------|-------|------|
| C30B | C25B | C26B | 118.0 | -0.6 |
| C30B | C25B | Sn1B | 125.6 | -3.4 |
| C26B | C25B | Sn1B | 116.3 | 4.0  |
| C27B | C26B | C25B | 121.2 | 0.2  |
| C28B | C27B | C26B | 119.9 | 0.1  |
| C27B | C28B | C29B | 119.6 | 0.2  |
| C28B | C29B | C30B | 120.2 | -0.2 |
| C29B | C30B | C25B | 121.0 | 0.3  |

**Table S11.** M05-2X-GD3 calculated bond lengths and differences for Compound 4”

| Calculated Bond Length (Å) |      |        | Differences in Bond Length<br>(Calc. – Exp.) |
|----------------------------|------|--------|----------------------------------------------|
| Sn1B                       | C19B | 2.1306 | 0.008                                        |
| Sn1B                       | C25B | 2.1335 | 0.010                                        |
| Sn1B                       | C1B  | 2.1576 | -0.004                                       |
| Sn1B                       | C13B | 2.1506 | 0.003                                        |
| O1B                        | C8B  | 1.3614 | 0.013                                        |
| O1B                        | C9B  | 1.4416 | 0.004                                        |
| N1B                        | C8B  | 1.2764 | -0.009                                       |
| N1B                        | C10B | 1.4770 | 0.006                                        |
| C1B                        | C2B  | 1.4918 | 0.008                                        |
| C2B                        | C3B  | 1.4022 | -0.006                                       |
| C2B                        | C7B  | 1.4114 | 0.009                                        |
| C3B                        | C4B  | 1.3893 | -0.010                                       |
| C4B                        | C5B  | 1.3944 | -0.018                                       |
| C5B                        | C6B  | 1.3877 | -0.006                                       |
| C6B                        | C7B  | 1.4011 | -0.012                                       |
| C7B                        | C8B  | 1.4701 | -0.002                                       |
| C9B                        | C10B | 1.5444 | -0.002                                       |
| C10B                       | C12B | 1.5296 | -0.011                                       |
| C10B                       | C11B | 1.5243 | 0.000                                        |
| C13B                       | C14B | 1.4023 | -0.015                                       |
| C13B                       | C18B | 1.4006 | 0.000                                        |
| C14B                       | C15B | 1.3943 | 0.000                                        |
| C15B                       | C16B | 1.3944 | -0.035                                       |
| C16B                       | C17B | 1.3931 | -0.006                                       |
| C17B                       | C18B | 1.3958 | -0.011                                       |
| C19B                       | C20B | 1.4007 | -0.015                                       |
| C19B                       | C24B | 1.4004 | -0.006                                       |
| C20B                       | C21B | 1.3948 | -0.002                                       |
| C21B                       | C22B | 1.3940 | -0.023                                       |
| C22B                       | C23B | 1.3939 | -0.015                                       |
| C23B                       | C24B | 1.3953 | -0.004                                       |
| C25B                       | C30B | 1.4002 | -0.008                                       |
| C25B                       | C26B | 1.4027 | -0.003                                       |
| C26B                       | C27B | 1.3948 | -0.013                                       |
| C27B                       | C28B | 1.3929 | -0.012                                       |
| C28B                       | C29B | 1.3935 | -0.010                                       |
| C29B                       | C30B | 1.3943 | -0.007                                       |
| Sn1B                       | N1B  | 2.9590 | 0.275                                        |

**Table S12.** M05-2X-GD3 calculated bond angles and differences for Compound 4”

| Calculated Bond Angle (°) |      |      | Differences in Bond Length<br>(Calc. – Exp.) |      |
|---------------------------|------|------|----------------------------------------------|------|
| C19B                      | Sn1B | C25B | 112.5                                        | -2.0 |
| C19B                      | Sn1B | C1B  | 111.3                                        | 0.8  |
| C25B                      | Sn1B | C1B  | 120.5                                        | -4.4 |
| C19B                      | Sn1B | C13B | 104.1                                        | 4.3  |
| C25B                      | Sn1B | C13B | 101.7                                        | 4.1  |
| C1B                       | Sn1B | C13B | 104.6                                        | -1.3 |
| C8B                       | O1B  | C9B  | 105.8                                        | -0.4 |
| C8B                       | N1B  | C10B | 107.6                                        | 0.1  |
| C2B                       | C1B  | Sn1B | 114.5                                        | -3.5 |
| C3B                       | C2B  | C7B  | 117.3                                        | -0.3 |
| C3B                       | C2B  | C1B  | 119.2                                        | -0.1 |
| C7B                       | C2B  | C1B  | 123.6                                        | 0.3  |
| C4B                       | C3B  | C2B  | 121.9                                        | 0.2  |
| C5B                       | C4B  | C3B  | 120.2                                        | 0.4  |
| C4B                       | C5B  | C6B  | 119.1                                        | -0.3 |
| C5B                       | C6B  | C7B  | 120.8                                        | 0.8  |
| C6B                       | C7B  | C2B  | 120.7                                        | -0.8 |
| C6B                       | C7B  | C8B  | 117.9                                        | 1.2  |
| C2B                       | C7B  | C8B  | 121.4                                        | -0.3 |
| N1B                       | C8B  | O1B  | 117.3                                        | 0.5  |
| N1B                       | C8B  | C7B  | 126.7                                        | 1.6  |
| O1B                       | C8B  | C7B  | 115.9                                        | -2.0 |
| O1B                       | C9B  | C10B | 104.1                                        | 0.5  |
| N1B                       | C10B | C12B | 108.4                                        | 0.8  |
| N1B                       | C10B | C11B | 111.0                                        | -1.8 |
| C12B                      | C10B | C11B | 110.9                                        | -0.2 |
| N1B                       | C10B | C9B  | 102.6                                        | 0.5  |
| C12B                      | C10B | C9B  | 111.6                                        | 0.9  |
| C11B                      | C10B | C9B  | 112.0                                        | -0.2 |
| C14B                      | C13B | C18B | 117.9                                        | -0.3 |
| C14B                      | C13B | Sn1B | 120.4                                        | 1.1  |
| C18B                      | C13B | Sn1B | 121.7                                        | -0.8 |
| C13B                      | C14B | C15B | 121.3                                        | -0.1 |
| C16B                      | C15B | C14B | 119.9                                        | 0.1  |
| C15B                      | C16B | C17B | 119.8                                        | 0.7  |
| C18B                      | C17B | C16B | 120.0                                        | -0.4 |
| C17B                      | C18B | C13B | 121.2                                        | -0.1 |
| C20B                      | C19B | C24B | 118.1                                        | -0.1 |
| C20B                      | C19B | Sn1B | 120.7                                        | 1.1  |
| C24B                      | C19B | Sn1B | 121.2                                        | -1.1 |
| C19B                      | C20B | C21B | 121.2                                        | 0.2  |
| C22B                      | C21B | C20B | 119.9                                        | -0.1 |
| C21B                      | C22B | C23B | 119.7                                        | 0.1  |
| C22B                      | C23B | C24B | 120.0                                        | 0.4  |
| C23B                      | C24B | C19B | 121.1                                        | -0.6 |

|      |      |      |       |      |
|------|------|------|-------|------|
| C30B | C25B | C26B | 118.0 | -0.5 |
| C30B | C25B | Sn1B | 126.2 | -4.0 |
| C26B | C25B | Sn1B | 115.8 | 4.5  |
| C27B | C26B | C25B | 121.3 | 0.2  |
| C28B | C27B | C26B | 119.9 | 0.1  |
| C27B | C28B | C29B | 119.7 | 0.1  |
| C28B | C29B | C30B | 120.2 | -0.2 |
| C29B | C30B | C25B | 121.0 | 0.3  |

**Table S13.** B3PW91-GD3BJ calculated bond lengths and differences for Compound 7

| Calculated Bond Length (Å) |     |        | Differences in Bond Length<br>(Calc. – Exp.) |
|----------------------------|-----|--------|----------------------------------------------|
| Sn1                        | C18 | 2.1308 | 0.0069                                       |
| Sn1                        | C24 | 2.1331 | 0.0094                                       |
| Sn1                        | C11 | 2.1506 | 0.0096                                       |
| Sn1                        | C12 | 2.1583 | 0.0170                                       |
| O1                         | C1  | 1.3533 | 0.0080                                       |
| O1                         | C2  | 1.4461 | 0.0085                                       |
| N1                         | C1  | 1.2796 | -0.0117                                      |
| N1                         | C3  | 1.4730 | 0.0118                                       |
| C1                         | C6  | 1.4642 | 0.0054                                       |
| C2                         | C3  | 1.5540 | -0.0050                                      |
| C3                         | C4  | 1.5253 | -0.0057                                      |
| C3                         | C5  | 1.5300 | -0.0081                                      |
| C6                         | C7  | 1.3988 | -0.0060                                      |
| C6                         | C11 | 1.4088 | -0.0029                                      |
| C7                         | C8  | 1.3933 | -0.0066                                      |
| C8                         | C9  | 1.3948 | -0.0113                                      |
| C9                         | C10 | 1.3982 | -0.0050                                      |
| C10                        | C11 | 1.3969 | -0.0062                                      |
| C12                        | C17 | 1.4032 | -0.0047                                      |
| C12                        | C13 | 1.4028 | -0.0023                                      |
| C13                        | C14 | 1.3964 | -0.0052                                      |
| C14                        | C15 | 1.3955 | -0.0172                                      |
| C15                        | C16 | 1.3958 | -0.0151                                      |
| C16                        | C17 | 1.3963 | -0.0076                                      |
| C18                        | C19 | 1.4006 | -0.0066                                      |
| C18                        | C23 | 1.4024 | -0.0086                                      |
| C19                        | C20 | 1.3953 | -0.0039                                      |
| C20                        | C21 | 1.3959 | -0.0219                                      |
| C21                        | C22 | 1.3951 | -0.0178                                      |
| C22                        | C23 | 1.3963 | -0.0070                                      |
| C24                        | C25 | 1.4018 | -0.0140                                      |
| C24                        | C29 | 1.4003 | -0.0103                                      |
| C25                        | C26 | 1.3957 | -0.0067                                      |
| C26                        | C27 | 1.3960 | -0.0221                                      |
| C27                        | C28 | 1.3953 | -0.0250                                      |
| C28                        | C29 | 1.3962 | -0.0040                                      |
| Sn1                        | N1  | 2.6873 | 0.0745                                       |



**Table S14.** B3PW91-GD3BJ calculated bond angles and differences for Compound 7

| Calculated Bond Angle (°) |     |     | Differences in Bond Length<br>(Calc. – Exp.) |      |
|---------------------------|-----|-----|----------------------------------------------|------|
| C18                       | Sn1 | C24 | 118.2                                        | -3.1 |
| C18                       | Sn1 | C11 | 118.4                                        | -1.3 |
| C24                       | Sn1 | C11 | 110.6                                        | 4.3  |
| C18                       | Sn1 | C12 | 101.4                                        | 0.6  |
| C24                       | Sn1 | C12 | 103.0                                        | -1.0 |
| C11                       | Sn1 | C12 | 101.9                                        | 0.5  |
| C1                        | O1  | C2  | 105.7                                        | -0.3 |
| C1                        | N1  | C3  | 108.3                                        | -0.2 |
| N1                        | C1  | O1  | 117.6                                        | 0.8  |
| N1                        | C1  | C6  | 123.6                                        | 0.4  |
| O1                        | C1  | C6  | 118.8                                        | -1.2 |
| O1                        | C2  | C3  | 104.8                                        | 0.4  |
| N1                        | C3  | C4  | 110.6                                        | -1.0 |
| N1                        | C3  | C5  | 109.0                                        | -0.2 |
| C4                        | C3  | C5  | 110.7                                        | 0.2  |
| N1                        | C3  | C2  | 102.2                                        | 0.5  |
| C4                        | C3  | C2  | 112.3                                        | 0.2  |
| C5                        | C3  | C2  | 111.7                                        | 0.3  |
| C7                        | C6  | C11 | 121.4                                        | -0.4 |
| C7                        | C6  | C1  | 120.9                                        | -0.5 |
| C11                       | C6  | C1  | 117.6                                        | 0.9  |
| C8                        | C7  | C6  | 119.5                                        | 0.5  |
| C9                        | C8  | C7  | 119.9                                        | -0.1 |
| C8                        | C9  | C10 | 120.2                                        | -0.2 |
| C11                       | C10 | C9  | 121.0                                        | 0.4  |
| C10                       | C11 | C6  | 117.9                                        | -0.3 |
| C10                       | C11 | Sn1 | 120.4                                        | -0.2 |
| C6                        | C11 | Sn1 | 121.6                                        | 0.6  |
| C17                       | C12 | C13 | 117.9                                        | -0.8 |
| C17                       | C12 | Sn1 | 121.4                                        | -0.2 |
| C13                       | C12 | Sn1 | 120.6                                        | 1.1  |
| C14                       | C13 | C12 | 121.2                                        | 0.0  |
| C15                       | C14 | C13 | 119.9                                        | 0.3  |
| C14                       | C15 | C16 | 119.7                                        | 0.1  |
| C15                       | C16 | C17 | 119.9                                        | 0.0  |
| C16                       | C17 | C12 | 121.2                                        | 0.4  |
| C19                       | C18 | C23 | 118.3                                        | -0.6 |
| C19                       | C18 | Sn1 | 122.5                                        | 0.5  |
| C23                       | C18 | Sn1 | 119.1                                        | 0.1  |
| C20                       | C19 | C18 | 121.0                                        | -0.2 |
| C21                       | C20 | C19 | 120.0                                        | 0.4  |
| C20                       | C21 | C22 | 119.7                                        | 0.1  |
| C21                       | C22 | C23 | 119.9                                        | 0.0  |
| C22                       | C23 | C18 | 121.0                                        | 0.3  |
| C25                       | C24 | C29 | 118.3                                        | -0.7 |

|     |     |     |       |      |
|-----|-----|-----|-------|------|
| C25 | C24 | Sn1 | 120.1 | 1.1  |
| C29 | C24 | Sn1 | 121.6 | -0.5 |
| C24 | C25 | C26 | 121.0 | 0.1  |
| C27 | C26 | C25 | 120.0 | 0.4  |
| C28 | C27 | C26 | 119.7 | -0.1 |
| C27 | C28 | C29 | 120.0 | 0.2  |
| C24 | C29 | C28 | 121.0 | 0.1  |

**Table S15.** PBE0-GD3BJ calculated bond lengths and differences for Compound 7

| Calculated Bond Length (Å) |     |        | Differences in Bond Length<br>(Calc. – Exp.) |
|----------------------------|-----|--------|----------------------------------------------|
| Sn1                        | C18 | 2.1362 | 0.0015                                       |
| Sn1                        | C24 | 2.1381 | 0.0044                                       |
| Sn1                        | C11 | 2.1550 | 0.0052                                       |
| Sn1                        | C12 | 2.1641 | 0.0112                                       |
| O1                         | C1  | 1.3498 | 0.0115                                       |
| O1                         | C2  | 1.4403 | 0.0143                                       |
| N1                         | C1  | 1.2780 | -0.0101                                      |
| N1                         | C3  | 1.4712 | 0.0137                                       |
| C1                         | C6  | 1.4639 | 0.0057                                       |
| C2                         | C3  | 1.5505 | -0.0016                                      |
| C3                         | C4  | 1.5234 | -0.0038                                      |
| C3                         | C5  | 1.5282 | -0.0063                                      |
| C6                         | C7  | 1.3975 | -0.0047                                      |
| C6                         | C11 | 1.4069 | -0.0010                                      |
| C7                         | C8  | 1.3919 | -0.0052                                      |
| C8                         | C9  | 1.3933 | -0.0097                                      |
| C9                         | C10 | 1.3969 | -0.0038                                      |
| C10                        | C11 | 1.3961 | -0.0054                                      |
| C12                        | C17 | 1.4023 | -0.0038                                      |
| C12                        | C13 | 1.4018 | -0.0013                                      |
| C13                        | C14 | 1.3954 | -0.0042                                      |
| C14                        | C15 | 1.3940 | -0.0157                                      |
| C15                        | C16 | 1.3943 | -0.0136                                      |
| C16                        | C17 | 1.3951 | -0.0065                                      |
| C18                        | C19 | 1.3996 | -0.0056                                      |
| C18                        | C23 | 1.4014 | -0.0076                                      |
| C19                        | C20 | 1.3943 | -0.0029                                      |
| C20                        | C21 | 1.3944 | -0.0204                                      |
| C21                        | C22 | 1.3936 | -0.0164                                      |
| C22                        | C23 | 1.3952 | -0.0059                                      |
| C24                        | C25 | 1.4008 | -0.0130                                      |
| C24                        | C29 | 1.3997 | -0.0096                                      |
| C25                        | C26 | 1.3948 | -0.0059                                      |
| C26                        | C27 | 1.3945 | -0.0206                                      |
| C27                        | C28 | 1.3939 | -0.0236                                      |
| C28                        | C29 | 1.3951 | -0.0029                                      |
| Sn1                        | N1  | 2.7045 | 0.0574                                       |

**Table S16.** PBE0-GD3BJ calculated bond angles and differences for Compound 7

| Calculated Bond Angle (°) |     |     | Differences in Bond Length<br>(Calc. – Exp.) |      |
|---------------------------|-----|-----|----------------------------------------------|------|
| C18                       | Sn1 | C24 | 117.8                                        | -2.7 |
| C18                       | Sn1 | C11 | 118.1                                        | -1.0 |
| C24                       | Sn1 | C11 | 111.5                                        | 3.4  |
| C18                       | Sn1 | C12 | 101.4                                        | 0.7  |
| C24                       | Sn1 | C12 | 102.8                                        | -0.8 |
| C11                       | Sn1 | C12 | 101.8                                        | 0.6  |
| C1                        | O1  | C2  | 105.7                                        | -0.2 |
| C1                        | N1  | C3  | 108.0                                        | 0.1  |
| N1                        | C1  | O1  | 117.8                                        | 0.6  |
| N1                        | C1  | C6  | 123.8                                        | 0.2  |
| O1                        | C1  | C6  | 118.4                                        | -0.9 |
| O1                        | C2  | C3  | 104.8                                        | 0.4  |
| N1                        | C3  | C4  | 110.8                                        | -1.2 |
| N1                        | C3  | C5  | 109.1                                        | -0.4 |
| C4                        | C3  | C5  | 110.6                                        | 0.3  |
| N1                        | C3  | C2  | 102.2                                        | 0.5  |
| C4                        | C3  | C2  | 112.2                                        | 0.3  |
| C5                        | C3  | C2  | 111.6                                        | 0.4  |
| C7                        | C6  | C11 | 121.5                                        | -0.5 |
| C7                        | C6  | C1  | 120.7                                        | -0.3 |
| C11                       | C6  | C1  | 117.8                                        | 0.7  |
| C8                        | C7  | C6  | 119.5                                        | 0.5  |
| C9                        | C8  | C7  | 119.8                                        | -0.1 |
| C8                        | C9  | C10 | 120.2                                        | -0.2 |
| C11                       | C10 | C9  | 121.0                                        | 0.4  |
| C10                       | C11 | C6  | 117.8                                        | -0.2 |
| C10                       | C11 | Sn1 | 120.2                                        | -0.1 |
| C6                        | C11 | Sn1 | 121.8                                        | 0.3  |
| C17                       | C12 | C13 | 117.8                                        | -0.7 |
| C17                       | C12 | Sn1 | 121.4                                        | -0.2 |
| C13                       | C12 | Sn1 | 120.7                                        | 1.0  |
| C14                       | C13 | C12 | 121.3                                        | 0.0  |
| C15                       | C14 | C13 | 120.0                                        | 0.3  |
| C14                       | C15 | C16 | 119.7                                        | 0.1  |
| C15                       | C16 | C17 | 119.9                                        | 0.0  |
| C16                       | C17 | C12 | 121.3                                        | 0.4  |
| C19                       | C18 | C23 | 118.2                                        | -0.5 |
| C19                       | C18 | Sn1 | 122.7                                        | 0.3  |
| C23                       | C18 | Sn1 | 119.0                                        | 0.2  |
| C20                       | C19 | C18 | 121.0                                        | -0.3 |
| C21                       | C20 | C19 | 120.0                                        | 0.4  |
| C20                       | C21 | C22 | 119.7                                        | 0.2  |
| C21                       | C22 | C23 | 119.9                                        | 0.0  |
| C22                       | C23 | C18 | 121.0                                        | 0.2  |
| C25                       | C24 | C29 | 118.2                                        | -0.6 |

|     |     |     |       |      |
|-----|-----|-----|-------|------|
| C25 | C24 | Sn1 | 120.4 | 0.9  |
| C29 | C24 | Sn1 | 121.4 | -0.3 |
| C24 | C25 | C26 | 121.1 | 0.0  |
| C27 | C26 | C25 | 120.0 | 0.4  |
| C28 | C27 | C26 | 119.7 | -0.1 |
| C27 | C28 | C29 | 120.0 | 0.2  |
| C24 | C29 | C28 | 121.0 | 0.1  |

**Table S17.** M05-2X-GD3 calculated bond lengths and differences for Compound 7

| Calculated Bond Length (Å) |     |        | Differences in Bond Length<br>(Calc. – Exp.) |
|----------------------------|-----|--------|----------------------------------------------|
| Sn1                        | C18 | 2.1303 | 0.0075                                       |
| Sn1                        | C24 | 2.1318 | 0.0107                                       |
| Sn1                        | C11 | 2.1505 | 0.0097                                       |
| Sn1                        | C12 | 2.1578 | 0.0174                                       |
| O1                         | C1  | 1.3535 | 0.0078                                       |
| O1                         | C2  | 1.4469 | 0.0078                                       |
| N1                         | C1  | 1.2737 | -0.0058                                      |
| N1                         | C3  | 1.4753 | 0.0096                                       |
| C1                         | C6  | 1.4695 | 0.0001                                       |
| C2                         | C3  | 1.5471 | 0.0019                                       |
| C3                         | C4  | 1.5242 | -0.0046                                      |
| C3                         | C5  | 1.5300 | -0.0082                                      |
| C6                         | C7  | 1.3956 | -0.0027                                      |
| C6                         | C11 | 1.4050 | 0.0008                                       |
| C7                         | C8  | 1.3922 | -0.0055                                      |
| C8                         | C9  | 1.3925 | -0.0090                                      |
| C9                         | C10 | 1.3972 | -0.0040                                      |
| C10                        | C11 | 1.3965 | -0.0058                                      |
| C12                        | C17 | 1.4023 | -0.0037                                      |
| C12                        | C13 | 1.4014 | -0.0008                                      |
| C13                        | C14 | 1.3956 | -0.0044                                      |
| C14                        | C15 | 1.3933 | -0.0150                                      |
| C15                        | C16 | 1.3941 | -0.0134                                      |
| C16                        | C17 | 1.3949 | -0.0062                                      |
| C18                        | C19 | 1.3995 | -0.0055                                      |
| C18                        | C23 | 1.4012 | -0.0074                                      |
| C19                        | C20 | 1.3943 | -0.0030                                      |
| C20                        | C21 | 1.3940 | -0.0200                                      |
| C21                        | C22 | 1.3931 | -0.0159                                      |
| C22                        | C23 | 1.3952 | -0.0059                                      |
| C24                        | C25 | 1.4007 | -0.0129                                      |
| C24                        | C29 | 1.3993 | -0.0092                                      |
| C25                        | C26 | 1.3948 | -0.0059                                      |
| C26                        | C27 | 1.3943 | -0.0205                                      |
| C27                        | C28 | 1.3935 | -0.0232                                      |
| C28                        | C29 | 1.3953 | -0.0031                                      |
| Sn1                        | N1  | 2.7273 | 0.0346                                       |

**Table S18.** M05-2X-GD3 calculated bond angles and differences for Compound 7

| Calculated Bond Angle (°) |     |     | Differences in Bond Length<br>(Calc. – Exp.) |      |
|---------------------------|-----|-----|----------------------------------------------|------|
| C18                       | Sn1 | C24 | 117.3                                        | -2.2 |
| C18                       | Sn1 | C11 | 117.9                                        | -0.8 |
| C24                       | Sn1 | C11 | 111.9                                        | 3.0  |
| C18                       | Sn1 | C12 | 101.4                                        | 0.6  |
| C24                       | Sn1 | C12 | 102.9                                        | -0.9 |
| C11                       | Sn1 | C12 | 102.0                                        | 0.4  |
| C1                        | O1  | C2  | 105.3                                        | 0.1  |
| C1                        | N1  | C3  | 107.8                                        | 0.3  |
| N1                        | C1  | O1  | 117.7                                        | 0.7  |
| N1                        | C1  | C6  | 124.0                                        | 0.0  |
| O1                        | C1  | C6  | 118.3                                        | -0.7 |
| O1                        | C2  | C3  | 104.2                                        | 0.9  |
| N1                        | C3  | C4  | 110.8                                        | -1.2 |
| N1                        | C3  | C5  | 108.9                                        | -0.2 |
| C4                        | C3  | C5  | 110.8                                        | 0.1  |
| N1                        | C3  | C2  | 102.2                                        | 0.6  |
| C4                        | C3  | C2  | 112.4                                        | 0.1  |
| C5                        | C3  | C2  | 111.4                                        | 0.6  |
| C7                        | C6  | C11 | 121.9                                        | -0.9 |
| C7                        | C6  | C1  | 120.3                                        | 0.1  |
| C11                       | C6  | C1  | 117.8                                        | 0.7  |
| C8                        | C7  | C6  | 119.3                                        | 0.7  |
| C9                        | C8  | C7  | 119.8                                        | 0.0  |
| C8                        | C9  | C10 | 120.3                                        | -0.3 |
| C11                       | C10 | C9  | 121.1                                        | 0.4  |
| C10                       | C11 | C6  | 117.6                                        | 0.1  |
| C10                       | C11 | Sn1 | 120.1                                        | 0.0  |
| C6                        | C11 | Sn1 | 122.2                                        | -0.1 |
| C17                       | C12 | C13 | 117.8                                        | -0.7 |
| C17                       | C12 | Sn1 | 121.4                                        | -0.2 |
| C13                       | C12 | Sn1 | 120.8                                        | 0.9  |
| C14                       | C13 | C12 | 121.3                                        | -0.1 |
| C15                       | C14 | C13 | 120.0                                        | 0.3  |
| C14                       | C15 | C16 | 119.7                                        | 0.1  |
| C15                       | C16 | C17 | 119.9                                        | 0.0  |
| C16                       | C17 | C12 | 121.3                                        | 0.3  |
| C19                       | C18 | C23 | 118.2                                        | -0.4 |
| C19                       | C18 | Sn1 | 122.9                                        | 0.1  |
| C23                       | C18 | Sn1 | 118.9                                        | 0.3  |
| C20                       | C19 | C18 | 121.0                                        | -0.3 |
| C21                       | C20 | C19 | 120.0                                        | 0.4  |
| C20                       | C21 | C22 | 119.7                                        | 0.1  |
| C21                       | C22 | C23 | 119.9                                        | 0.0  |
| C22                       | C23 | C18 | 121.1                                        | 0.2  |
| C25                       | C24 | C29 | 118.2                                        | -0.6 |

|     |     |     |       |      |
|-----|-----|-----|-------|------|
| C25 | C24 | Sn1 | 120.6 | 0.6  |
| C29 | C24 | Sn1 | 121.1 | 0.0  |
| C24 | C25 | C26 | 121.1 | 0.0  |
| C27 | C26 | C25 | 119.9 | 0.4  |
| C28 | C27 | C26 | 119.7 | -0.2 |
| C27 | C28 | C29 | 120.0 | 0.2  |
| C24 | C29 | C28 | 121.1 | 0.1  |



**Table S19.** B3PW91-GD3BJ calculated bond lengths and differences for Compound **9'**

| Calculated Bond Length (Å) |      |        | Differences in Bond Length<br>(Calc. – Exp.) |
|----------------------------|------|--------|----------------------------------------------|
| Sn1A                       | C18A | 2.1244 | 0.0006                                       |
| Sn1A                       | C12A | 2.1210 | 0.0112                                       |
| Sn1A                       | C11A | 2.1483 | -0.0083                                      |
| Sn1A                       | N1A  | 2.4254 | 0.0404                                       |
| Sn1A                       | Cl1A | 2.4335 | 0.0498                                       |
| O1A                        | C1A  | 1.3438 | -0.0009                                      |
| O1A                        | C2A  | 1.4515 | 0.0104                                       |
| N1A                        | C1A  | 1.2858 | -0.0040                                      |
| N1A                        | C3A  | 1.4763 | 0.0164                                       |
| C1A                        | C6A  | 1.4591 | 0.0018                                       |
| C2A                        | C3A  | 1.5474 | -0.0034                                      |
| C3A                        | C5A  | 1.5219 | -0.0028                                      |
| C3A                        | C4A  | 1.5315 | -0.0032                                      |
| C6A                        | C7A  | 1.3976 | -0.0037                                      |
| C6A                        | C11A | 1.4090 | -0.0057                                      |
| C7A                        | C8A  | 1.3933 | -0.0059                                      |
| C8A                        | C9A  | 1.3957 | -0.0141                                      |
| C9A                        | C10A | 1.3990 | -0.0055                                      |
| C10A                       | C11A | 1.3936 | -0.0034                                      |
| C12A                       | C13A | 1.4010 | -0.0104                                      |
| C12A                       | C17A | 1.4000 | 0.0029                                       |
| C13A                       | C14A | 1.3962 | -0.0074                                      |
| C14A                       | C15A | 1.3953 | -0.0115                                      |
| C15A                       | C16A | 1.3959 | -0.0101                                      |
| C16A                       | C17A | 1.3953 | -0.0060                                      |
| C18A                       | C19A | 1.4005 | -0.0105                                      |
| C18A                       | C23A | 1.4011 | -0.0101                                      |
| C19A                       | C20A | 1.3951 | -0.0045                                      |
| C20A                       | C21A | 1.3956 | -0.0142                                      |
| C21A                       | C22A | 1.3951 | -0.0147                                      |
| C22A                       | C23A | 1.3960 | -0.0003                                      |
| Sn1A                       | N1A  | 2.4254 | 0.0404                                       |

**Table S20.** B3PW91-GD3BJ calculated bond angles and differences for Compound 9'

| Calculated Bond Angle (°) |      |      | Differences in Bond Length<br>(Calc. – Exp.) |      |
|---------------------------|------|------|----------------------------------------------|------|
| C18A                      | Sn1A | C12A | 115.3                                        | 2.6  |
| C18A                      | Sn1A | C11A | 117.5                                        | 1.9  |
| C12A                      | Sn1A | C11A | 122.1                                        | -1.1 |
| C18A                      | Sn1A | N1A  | 88.5                                         | 1.8  |
| C12A                      | Sn1A | N1A  | 84.9                                         | 6.8  |
| C11A                      | Sn1A | N1A  | 74.3                                         | 0.7  |
| C18A                      | Sn1A | Cl1A | 98.2                                         | -4.0 |
| C12A                      | Sn1A | Cl1A | 97.9                                         | -3.2 |
| C11A                      | Sn1A | Cl1A | 96.8                                         | -2.4 |
| N1A                       | Sn1A | Cl1A | 170.7                                        | -1.4 |
| C1A                       | O1A  | C2A  | 105.4                                        | 0.3  |
| C1A                       | N1A  | C3A  | 108.2                                        | -0.8 |
| C1A                       | N1A  | Sn1A | 109.6                                        | -2.6 |
| C3A                       | N1A  | Sn1A | 141.8                                        | 3.7  |
| N1A                       | C1A  | O1A  | 117.0                                        | 1.0  |
| N1A                       | C1A  | C6A  | 122.3                                        | 1.2  |
| O1A                       | C1A  | C6A  | 120.7                                        | -2.2 |
| O1A                       | C2A  | C3A  | 104.4                                        | -0.1 |
| N1A                       | C3A  | C5A  | 111.2                                        | -0.4 |
| N1A                       | C3A  | C4A  | 108.9                                        | -0.6 |
| C5A                       | C3A  | C4A  | 111.2                                        | 0.7  |
| N1A                       | C3A  | C2A  | 100.9                                        | 1.0  |
| C5A                       | C3A  | C2A  | 113.0                                        | -0.1 |
| C4A                       | C3A  | C2A  | 111.2                                        | -0.7 |
| C7A                       | C6A  | C11A | 121.8                                        | -0.6 |
| C7A                       | C6A  | C1A  | 122.1                                        | -0.5 |
| C11A                      | C6A  | C1A  | 116.1                                        | 1.0  |
| C8A                       | C7A  | C6A  | 119.0                                        | 0.2  |
| C9A                       | C8A  | C7A  | 120.0                                        | 0.3  |
| C8A                       | C9A  | C10A | 120.6                                        | -0.1 |
| C11A                      | C10A | C9A  | 120.4                                        | -0.1 |
| C10A                      | C11A | C6A  | 118.2                                        | 0.3  |
| C10A                      | C11A | Sn1A | 124.2                                        | 0.5  |
| C6A                       | C11A | Sn1A | 117.6                                        | -0.8 |
| C13A                      | C12A | C17A | 118.7                                        | -0.7 |
| C13A                      | C12A | Sn1A | 119.4                                        | 2.6  |
| C17A                      | C12A | Sn1A | 121.8                                        | -1.8 |
| C14A                      | C13A | C12A | 120.8                                        | 0.4  |
| C15A                      | C14A | C13A | 120.0                                        | 0.2  |
| C14A                      | C15A | C16A | 119.8                                        | -0.1 |
| C15A                      | C16A | C17A | 120.1                                        | 0.1  |
| C16A                      | C17A | C12A | 120.7                                        | 0.1  |
| C19A                      | C18A | C23A | 118.6                                        | 0.1  |
| C19A                      | C18A | Sn1A | 121.5                                        | -1.9 |
| C23A                      | C18A | Sn1A | 119.9                                        | 1.7  |

|      |      |      |       |      |
|------|------|------|-------|------|
| C18A | C19A | C20A | 120.9 | -0.1 |
| C21A | C20A | C19A | 119.9 | 0.0  |
| C22A | C21A | C20A | 119.8 | 0.3  |
| C21A | C22A | C23A | 120.1 | -0.1 |
| C18A | C23A | C22A | 120.7 | -0.2 |

**Table S21.** PBE0-GD3BJ calculated bond lengths and differences for Compound 9'

| Calculated Bond Length (Å) |      |        | Differences in Bond Length<br>(Calc. – Exp.) |
|----------------------------|------|--------|----------------------------------------------|
| Sn1A                       | C18A | 2.1292 | -0.0042                                      |
| Sn1A                       | C12A | 2.1256 | 0.0066                                       |
| Sn1A                       | C11A | 2.1506 | -0.0106                                      |
| Sn1A                       | N1A  | 2.4474 | 0.0184                                       |
| Sn1A                       | Cl1A | 2.4332 | 0.0500                                       |
| O1A                        | C1A  | 1.3407 | 0.0022                                       |
| O1A                        | C2A  | 1.4452 | 0.0167                                       |
| N1A                        | C1A  | 1.2842 | -0.0024                                      |
| N1A                        | C3A  | 1.4752 | 0.0175                                       |
| C1A                        | C6A  | 1.4588 | 0.0020                                       |
| C2A                        | C3A  | 1.5440 | -0.0001                                      |
| C3A                        | C5A  | 1.5202 | -0.0011                                      |
| C3A                        | C4A  | 1.5298 | -0.0016                                      |
| C6A                        | C7A  | 1.3964 | -0.0025                                      |
| C6A                        | C11A | 1.4066 | -0.0033                                      |
| C7A                        | C8A  | 1.3919 | -0.0045                                      |
| C8A                        | C9A  | 1.3942 | -0.0126                                      |
| C9A                        | C10A | 1.3976 | -0.0042                                      |
| C10A                       | C11A | 1.3928 | -0.0026                                      |
| C12A                       | C13A | 1.4000 | -0.0094                                      |
| C12A                       | C17A | 1.3991 | 0.0039                                       |
| C13A                       | C14A | 1.3952 | -0.0064                                      |
| C14A                       | C15A | 1.3939 | -0.0101                                      |
| C15A                       | C16A | 1.3944 | -0.0087                                      |
| C16A                       | C17A | 1.3942 | -0.0049                                      |
| C18A                       | C19A | 1.3994 | -0.0094                                      |
| C18A                       | C23A | 1.4003 | -0.0092                                      |
| C19A                       | C20A | 1.3941 | -0.0035                                      |
| C20A                       | C21A | 1.3940 | -0.0127                                      |
| C21A                       | C22A | 1.3936 | -0.0133                                      |
| C22A                       | C23A | 1.3948 | 0.0009                                       |
| Sn1A                       | N1A  | 2.4474 | 0.0184                                       |

**Table S22.** PBE0-GD3BJ calculated bond angles and differences for Compound **9'**

| Calculated Bond Angle (°) |      |      | Differences in Bond Length<br>(Calc. – Exp.) |      |
|---------------------------|------|------|----------------------------------------------|------|
| C18A                      | Sn1A | C12A | 115.4                                        | 2.5  |
| C18A                      | Sn1A | C11A | 118.0                                        | 1.4  |
| C12A                      | Sn1A | C11A | 121.8                                        | -0.8 |
| C18A                      | Sn1A | N1A  | 89.0                                         | 1.3  |
| C12A                      | Sn1A | N1A  | 85.3                                         | 6.4  |
| C11A                      | Sn1A | N1A  | 74.1                                         | 0.9  |
| C18A                      | Sn1A | Cl1A | 98.0                                         | -3.8 |
| C12A                      | Sn1A | Cl1A | 97.7                                         | -3.0 |
| C11A                      | Sn1A | Cl1A | 96.6                                         | -2.2 |
| N1A                       | Sn1A | Cl1A | 170.3                                        | -0.9 |
| C1A                       | O1A  | C2A  | 105.3                                        | 0.4  |
| C1A                       | N1A  | C3A  | 107.9                                        | -0.5 |
| C1A                       | N1A  | Sn1A | 109.1                                        | -2.1 |
| C3A                       | N1A  | Sn1A | 142.5                                        | 3.0  |
| N1A                       | C1A  | O1A  | 117.2                                        | 0.9  |
| N1A                       | C1A  | C6A  | 122.6                                        | 0.9  |
| O1A                       | C1A  | C6A  | 120.3                                        | -1.8 |
| O1A                       | C2A  | C3A  | 104.4                                        | -0.1 |
| N1A                       | C3A  | C5A  | 111.5                                        | -0.7 |
| N1A                       | C3A  | C4A  | 109.0                                        | -0.7 |
| C5A                       | C3A  | C4A  | 111.1                                        | 0.8  |
| N1A                       | C3A  | C2A  | 100.9                                        | 1.0  |
| C5A                       | C3A  | C2A  | 112.9                                        | 0.1  |
| C4A                       | C3A  | C2A  | 111.1                                        | -0.6 |
| C7A                       | C6A  | C11A | 121.8                                        | -0.6 |
| C7A                       | C6A  | C1A  | 121.9                                        | -0.2 |
| C11A                      | C6A  | C1A  | 116.3                                        | 0.8  |
| C8A                       | C7A  | C6A  | 119.0                                        | 0.1  |
| C9A                       | C8A  | C7A  | 119.9                                        | 0.4  |
| C8A                       | C9A  | C10A | 120.6                                        | -0.1 |
| C11A                      | C10A | C9A  | 120.4                                        | -0.1 |
| C10A                      | C11A | C6A  | 118.2                                        | 0.3  |
| C10A                      | C11A | Sn1A | 124.0                                        | 0.7  |
| C6A                       | C11A | Sn1A | 117.8                                        | -1.0 |
| C13A                      | C12A | C17A | 118.7                                        | -0.6 |
| C13A                      | C12A | Sn1A | 119.5                                        | 2.5  |
| C17A                      | C12A | Sn1A | 121.8                                        | -1.9 |
| C14A                      | C13A | C12A | 120.8                                        | 0.4  |
| C15A                      | C14A | C13A | 120.0                                        | 0.2  |
| C14A                      | C15A | C16A | 119.8                                        | -0.1 |
| C15A                      | C16A | C17A | 120.1                                        | 0.1  |
| C16A                      | C17A | C12A | 120.7                                        | 0.0  |
| C19A                      | C18A | C23A | 118.6                                        | 0.2  |
| C19A                      | C18A | Sn1A | 121.8                                        | -2.3 |
| C23A                      | C18A | Sn1A | 119.6                                        | 2.0  |

|      |      |      |       |      |
|------|------|------|-------|------|
| C18A | C19A | C20A | 120.9 | -0.1 |
| C21A | C20A | C19A | 120.0 | 0.0  |
| C22A | C21A | C20A | 119.8 | 0.3  |
| C21A | C22A | C23A | 120.1 | -0.1 |
| C18A | C23A | C22A | 120.7 | -0.2 |

**Table S23.** M05-2X-GD3 calculated bond lengths and differences for Compound **9'**

| Calculated Bond Length (Å) |      |        | Differences in Bond Length<br>(Calc. – Exp.) |
|----------------------------|------|--------|----------------------------------------------|
| Sn1A                       | C18A | 2.1215 | 0.0035                                       |
| Sn1A                       | C12A | 2.1175 | 0.0148                                       |
| Sn1A                       | C11A | 2.1455 | -0.0055                                      |
| Sn1A                       | N1A  | 2.4512 | 0.0146                                       |
| Sn1A                       | Cl1A | 2.4351 | 0.0481                                       |
| O1A                        | C1A  | 1.3428 | 0.0000                                       |
| O1A                        | C2A  | 1.4519 | 0.0100                                       |
| N1A                        | C1A  | 1.2801 | 0.0017                                       |
| N1A                        | C3A  | 1.4798 | 0.0130                                       |
| C1A                        | C6A  | 1.4643 | -0.0035                                      |
| C2A                        | C3A  | 1.5428 | 0.0011                                       |
| C3A                        | C5A  | 1.5217 | -0.0027                                      |
| C3A                        | C4A  | 1.5313 | -0.0030                                      |
| C6A                        | C7A  | 1.3943 | -0.0005                                      |
| C6A                        | C11A | 1.4042 | -0.0010                                      |
| C7A                        | C8A  | 1.3921 | -0.0047                                      |
| C8A                        | C9A  | 1.3936 | -0.0121                                      |
| C9A                        | C10A | 1.3977 | -0.0043                                      |
| C10A                       | C11A | 1.3932 | -0.0030                                      |
| C12A                       | C13A | 1.3995 | -0.0089                                      |
| C12A                       | C17A | 1.3989 | 0.0040                                       |
| C13A                       | C14A | 1.3953 | -0.0065                                      |
| C14A                       | C15A | 1.3936 | -0.0098                                      |
| C15A                       | C16A | 1.3944 | -0.0087                                      |
| C16A                       | C17A | 1.3941 | -0.0048                                      |
| C18A                       | C19A | 1.3991 | -0.0091                                      |
| C18A                       | C23A | 1.4000 | -0.0089                                      |
| C19A                       | C20A | 1.3940 | -0.0034                                      |
| C20A                       | C21A | 1.3937 | -0.0123                                      |
| C21A                       | C22A | 1.3932 | -0.0129                                      |
| C22A                       | C23A | 1.3947 | 0.0011                                       |
| Sn1A                       | N1A  | 2.4512 | 0.0146                                       |

**Table S24.** M05-2X-GD3 calculated bond angles and differences for Compound **9'**

| Calculated Bond Angle (°) |      |      | Differences in Bond Length<br>(Calc. – Exp.) |      |
|---------------------------|------|------|----------------------------------------------|------|
| C18A                      | Sn1A | C12A | 115.7                                        | 2.2  |
| C18A                      | Sn1A | C11A | 118.4                                        | 1.0  |
| C12A                      | Sn1A | C11A | 121.2                                        | -0.2 |
| C18A                      | Sn1A | N1A  | 89.2                                         | 1.1  |
| C12A                      | Sn1A | N1A  | 85.2                                         | 6.5  |
| C11A                      | Sn1A | N1A  | 74.2                                         | 0.8  |
| C18A                      | Sn1A | Cl1A | 97.8                                         | -3.6 |
| C12A                      | Sn1A | Cl1A | 97.6                                         | -2.9 |
| C11A                      | Sn1A | Cl1A | 96.5                                         | -2.2 |
| N1A                       | Sn1A | Cl1A | 170.4                                        | -1.0 |
| C1A                       | O1A  | C2A  | 105.2                                        | 0.5  |
| C1A                       | N1A  | C3A  | 107.8                                        | -0.4 |
| C1A                       | N1A  | Sn1A | 108.9                                        | -1.8 |
| C3A                       | N1A  | Sn1A | 142.7                                        | 2.8  |
| N1A                       | C1A  | O1A  | 117.1                                        | 0.9  |
| N1A                       | C1A  | C6A  | 122.7                                        | 0.7  |
| O1A                       | C1A  | C6A  | 120.1                                        | -1.6 |
| O1A                       | C2A  | C3A  | 103.9                                        | 0.4  |
| N1A                       | C3A  | C5A  | 111.4                                        | -0.6 |
| N1A                       | C3A  | C4A  | 108.9                                        | -0.7 |
| C5A                       | C3A  | C4A  | 111.2                                        | 0.7  |
| N1A                       | C3A  | C2A  | 100.9                                        | 1.1  |
| C5A                       | C3A  | C2A  | 113.0                                        | 0.0  |
| C4A                       | C3A  | C2A  | 110.9                                        | -0.4 |
| C7A                       | C6A  | C11A | 122.3                                        | -1.1 |
| C7A                       | C6A  | C1A  | 121.4                                        | 0.2  |
| C11A                      | C6A  | C1A  | 116.3                                        | 0.8  |
| C8A                       | C7A  | C6A  | 118.8                                        | 0.4  |
| C9A                       | C8A  | C7A  | 119.9                                        | 0.4  |
| C8A                       | C9A  | C10A | 120.7                                        | -0.2 |
| C11A                      | C10A | C9A  | 120.4                                        | -0.1 |
| C10A                      | C11A | C6A  | 117.9                                        | 0.6  |
| C10A                      | C11A | Sn1A | 124.2                                        | 0.4  |
| C6A                       | C11A | Sn1A | 117.8                                        | -1.0 |
| C13A                      | C12A | C17A | 118.7                                        | -0.6 |
| C13A                      | C12A | Sn1A | 119.7                                        | 2.3  |
| C17A                      | C12A | Sn1A | 121.6                                        | -1.6 |
| C14A                      | C13A | C12A | 120.8                                        | 0.3  |
| C15A                      | C14A | C13A | 119.9                                        | 0.2  |
| C14A                      | C15A | C16A | 119.8                                        | -0.2 |
| C15A                      | C16A | C17A | 120.0                                        | 0.1  |
| C16A                      | C17A | C12A | 120.8                                        | 0.0  |
| C19A                      | C18A | C23A | 118.5                                        | 0.2  |
| C19A                      | C18A | Sn1A | 121.8                                        | -2.3 |
| C23A                      | C18A | Sn1A | 119.7                                        | 2.0  |



|      |      |      |       |      |
|------|------|------|-------|------|
| C18A | C19A | C20A | 120.9 | -0.2 |
| C21A | C20A | C19A | 119.9 | 0.0  |
| C22A | C21A | C20A | 119.8 | 0.3  |
| C21A | C22A | C23A | 120.0 | -0.1 |
| C18A | C23A | C22A | 120.8 | -0.3 |

**Table S25.** B3PW91-GD3BJ calculated bond lengths and differences for Compound **9**

| Calculated Bond Length (Å) |      |        | Differences in Bond Length<br>(Calc. – Exp.) |
|----------------------------|------|--------|----------------------------------------------|
| Sn1B                       | C18B | 2.1244 | -0.0011                                      |
| Sn1B                       | C12B | 2.1210 | 0.0121                                       |
| Sn1B                       | C11B | 2.1483 | -0.0062                                      |
| Sn1B                       | N1B  | 2.4254 | 0.0247                                       |
| Sn1B                       | Cl1B | 2.4335 | 0.0620                                       |
| O1B                        | C1B  | 1.3438 | -0.0040                                      |
| O1B                        | C2B  | 1.4515 | 0.0055                                       |
| N1B                        | C1B  | 1.2858 | -0.0011                                      |
| N1B                        | C3B  | 1.4763 | 0.0154                                       |
| C1B                        | C6B  | 1.4591 | 0.0097                                       |
| C2B                        | C3B  | 1.5474 | -0.0001                                      |
| C3B                        | C5B  | 1.5219 | -0.0001                                      |
| C3B                        | C4B  | 1.5315 | -0.0058                                      |
| C6B                        | C7B  | 1.3976 | -0.0086                                      |
| C6B                        | C11B | 1.4090 | -0.0071                                      |
| C7B                        | C8B  | 1.3933 | -0.0079                                      |
| C8B                        | C9B  | 1.3957 | -0.0115                                      |
| C9B                        | C10B | 1.3990 | -0.0029                                      |
| C10B                       | C11B | 1.3936 | -0.0012                                      |
| C12B                       | C17B | 1.4000 | -0.0077                                      |
| C12B                       | C13B | 1.4010 | -0.0065                                      |
| C13B                       | C14B | 1.3962 | -0.0062                                      |
| C14B                       | C15B | 1.3953 | -0.0116                                      |
| C15B                       | C16B | 1.3959 | -0.0135                                      |
| C16B                       | C17B | 1.3953 | -0.0065                                      |
| C18B                       | C23B | 1.4011 | -0.0102                                      |
| C18B                       | C19B | 1.4005 | -0.0093                                      |
| C19B                       | C20B | 1.3951 | -0.0055                                      |
| C20B                       | C21B | 1.3956 | -0.0136                                      |
| C21B                       | C22B | 1.3951 | -0.0120                                      |
| C22B                       | C23B | 1.3960 | -0.0124                                      |
| Sn1B                       | N1B  | 2.4254 | 0.0247                                       |

**Table S26.** B3PW91-GD3BJ calculated bond angles and differences for Compound 9”

| Calculated Bond Angle (°) |      |      | Differences in Bond Length<br>(Calc. – Exp.) |      |
|---------------------------|------|------|----------------------------------------------|------|
| C18B                      | Sn1B | C12B | 115.3                                        | 6.2  |
| C18B                      | Sn1B | C11B | 117.5                                        | 0.7  |
| C12B                      | Sn1B | C11B | 122.1                                        | -3.5 |
| C18B                      | Sn1B | N1B  | 88.5                                         | 0.5  |
| C12B                      | Sn1B | N1B  | 84.9                                         | 7.0  |
| C11B                      | Sn1B | N1B  | 74.3                                         | 0.9  |
| C18B                      | Sn1B | Cl1B | 98.2                                         | -5.1 |
| C12B                      | Sn1B | Cl1B | 97.9                                         | -2.9 |
| C11B                      | Sn1B | Cl1B | 96.8                                         | -1.2 |
| N1B                       | Sn1B | Cl1B | 170.7                                        | -0.3 |
| C1B                       | O1B  | C2B  | 105.4                                        | 0.4  |
| C1B                       | N1B  | C3B  | 108.2                                        | -0.8 |
| C1B                       | N1B  | Sn1B | 109.6                                        | -2.6 |
| C3B                       | N1B  | Sn1B | 141.8                                        | 2.9  |
| N1B                       | C1B  | O1B  | 117.0                                        | 1.2  |
| N1B                       | C1B  | C6B  | 122.3                                        | 0.8  |
| O1B                       | C1B  | C6B  | 120.7                                        | -2.0 |
| O1B                       | C2B  | C3B  | 104.4                                        | 0.2  |
| N1B                       | C3B  | C5B  | 111.2                                        | -0.5 |
| N1B                       | C3B  | C4B  | 108.9                                        | -0.2 |
| C5B                       | C3B  | C4B  | 111.2                                        | 0.2  |
| N1B                       | C3B  | C2B  | 100.9                                        | 1.0  |
| C5B                       | C3B  | C2B  | 113.0                                        | -0.2 |
| C4B                       | C3B  | C2B  | 111.2                                        | -0.2 |
| C7B                       | C6B  | C11B | 121.8                                        | 0.2  |
| C7B                       | C6B  | C1B  | 122.1                                        | -0.9 |
| C11B                      | C6B  | C1B  | 116.1                                        | 0.7  |
| C8B                       | C7B  | C6B  | 119.0                                        | -0.1 |
| C9B                       | C8B  | C7B  | 120.0                                        | 0.4  |
| C8B                       | C9B  | C10B | 120.6                                        | -0.1 |
| C11B                      | C10B | C9B  | 120.4                                        | -0.2 |
| C10B                      | C11B | C6B  | 118.2                                        | -0.1 |
| C10B                      | C11B | Sn1B | 124.2                                        | 1.2  |
| C6B                       | C11B | Sn1B | 117.6                                        | -1.0 |
| C17B                      | C12B | C13B | 118.7                                        | -0.3 |
| C17B                      | C12B | Sn1B | 121.8                                        | -1.1 |
| C13B                      | C12B | Sn1B | 119.4                                        | 1.3  |
| C14B                      | C13B | C12B | 120.8                                        | 0.0  |
| C15B                      | C14B | C13B | 120.0                                        | 0.1  |
| C16B                      | C15B | C14B | 119.8                                        | 0.1  |
| C15B                      | C16B | C17B | 120.1                                        | 0.0  |
| C16B                      | C17B | C12B | 120.7                                        | 0.2  |
| C23B                      | C18B | C19B | 118.6                                        | -0.2 |
| C23B                      | C18B | Sn1B | 119.9                                        | 2.8  |
| C19B                      | C18B | Sn1B | 121.5                                        | -2.6 |

|      |      |      |       |      |
|------|------|------|-------|------|
| C20B | C19B | C18B | 120.9 | 0.0  |
| C21B | C20B | C19B | 119.9 | 0.0  |
| C20B | C21B | C22B | 119.8 | -0.1 |
| C23B | C22B | C21B | 120.1 | 0.3  |
| C22B | C23B | C18B | 120.7 | 0.1  |

**Table S27.** PBE0-GD3BJ calculated bond lengths and differences for Compound 9”

| Calculated Bond Length (Å) |      |        | Differences in Bond Length<br>(Calc. – Exp.) |
|----------------------------|------|--------|----------------------------------------------|
| Sn1B                       | C18B | 2.1292 | -0.0059                                      |
| Sn1B                       | C12B | 2.1256 | 0.0075                                       |
| Sn1B                       | C11B | 2.1506 | -0.0085                                      |
| Sn1B                       | N1B  | 2.4474 | 0.0028                                       |
| Sn1B                       | Cl1B | 2.4332 | 0.0623                                       |
| O1B                        | C1B  | 1.3407 | -0.0009                                      |
| O1B                        | C2B  | 1.4452 | 0.0118                                       |
| N1B                        | C1B  | 1.2842 | 0.0006                                       |
| N1B                        | C3B  | 1.4752 | 0.0165                                       |
| C1B                        | C6B  | 1.4588 | 0.0099                                       |
| C2B                        | C3B  | 1.5440 | 0.0032                                       |
| C3B                        | C5B  | 1.5202 | 0.0016                                       |
| C3B                        | C4B  | 1.5298 | -0.0041                                      |
| C6B                        | C7B  | 1.3964 | -0.0074                                      |
| C6B                        | C11B | 1.4066 | -0.0047                                      |
| C7B                        | C8B  | 1.3919 | -0.0065                                      |
| C8B                        | C9B  | 1.3942 | -0.0101                                      |
| C9B                        | C10B | 1.3976 | -0.0016                                      |
| C10B                       | C11B | 1.3928 | -0.0005                                      |
| C12B                       | C17B | 1.3991 | -0.0068                                      |
| C12B                       | C13B | 1.4000 | -0.0054                                      |
| C13B                       | C14B | 1.3952 | -0.0052                                      |
| C14B                       | C15B | 1.3939 | -0.0101                                      |
| C15B                       | C16B | 1.3944 | -0.0121                                      |
| C16B                       | C17B | 1.3942 | -0.0054                                      |
| C18B                       | C23B | 1.4003 | -0.0093                                      |
| C18B                       | C19B | 1.3994 | -0.0082                                      |
| C19B                       | C20B | 1.3941 | -0.0045                                      |
| C20B                       | C21B | 1.3940 | -0.0121                                      |
| C21B                       | C22B | 1.3936 | -0.0106                                      |
| C22B                       | C23B | 1.3948 | -0.0112                                      |
| Sn1B                       | N1B  | 2.4474 | 0.0028                                       |

**Table S28.** PBE0-GD3BJ calculated bond angles and differences for Compound 9”

| Calculated Bond Angle (°) |      |      | Differences in Bond Length<br>(Calc. – Exp.) |      |
|---------------------------|------|------|----------------------------------------------|------|
| C18B                      | Sn1B | C12B | 115.4                                        | 6.1  |
| C18B                      | Sn1B | C11B | 118.0                                        | 0.2  |
| C12B                      | Sn1B | C11B | 121.8                                        | -3.3 |
| C18B                      | Sn1B | N1B  | 89.0                                         | 0.0  |
| C12B                      | Sn1B | N1B  | 85.3                                         | 6.6  |
| C11B                      | Sn1B | N1B  | 74.1                                         | 1.2  |
| C18B                      | Sn1B | Cl1B | 98.0                                         | -4.9 |
| C12B                      | Sn1B | Cl1B | 97.7                                         | -2.7 |
| C11B                      | Sn1B | Cl1B | 96.6                                         | -1.0 |
| N1B                       | Sn1B | Cl1B | 170.3                                        | 0.1  |
| C1B                       | O1B  | C2B  | 105.3                                        | 0.4  |
| C1B                       | N1B  | C3B  | 107.9                                        | -0.4 |
| C1B                       | N1B  | Sn1B | 109.1                                        | -2.1 |
| C3B                       | N1B  | Sn1B | 142.5                                        | 2.2  |
| N1B                       | C1B  | O1B  | 117.2                                        | 1.0  |
| N1B                       | C1B  | C6B  | 122.6                                        | 0.5  |
| O1B                       | C1B  | C6B  | 120.3                                        | -1.5 |
| O1B                       | C2B  | C3B  | 104.4                                        | 0.2  |
| N1B                       | C3B  | C5B  | 111.5                                        | -0.8 |
| N1B                       | C3B  | C4B  | 109.0                                        | -0.3 |
| C5B                       | C3B  | C4B  | 111.1                                        | 0.3  |
| N1B                       | C3B  | C2B  | 100.9                                        | 1.0  |
| C5B                       | C3B  | C2B  | 112.9                                        | 0.0  |
| C4B                       | C3B  | C2B  | 111.1                                        | -0.1 |
| C7B                       | C6B  | C11B | 121.8                                        | 0.1  |
| C7B                       | C6B  | C1B  | 121.9                                        | -0.7 |
| C11B                      | C6B  | C1B  | 116.3                                        | 0.5  |
| C8B                       | C7B  | C6B  | 119.0                                        | -0.1 |
| C9B                       | C8B  | C7B  | 119.9                                        | 0.4  |
| C8B                       | C9B  | C10B | 120.6                                        | -0.1 |
| C11B                      | C10B | C9B  | 120.4                                        | -0.2 |
| C10B                      | C11B | C6B  | 118.2                                        | -0.1 |
| C10B                      | C11B | Sn1B | 124.0                                        | 1.4  |
| C6B                       | C11B | Sn1B | 117.8                                        | -1.3 |
| C17B                      | C12B | C13B | 118.7                                        | -0.3 |
| C17B                      | C12B | Sn1B | 121.8                                        | -1.2 |
| C13B                      | C12B | Sn1B | 119.5                                        | 1.2  |
| C14B                      | C13B | C12B | 120.8                                        | 0.0  |
| C15B                      | C14B | C13B | 120.0                                        | 0.0  |
| C16B                      | C15B | C14B | 119.8                                        | 0.2  |
| C15B                      | C16B | C17B | 120.1                                        | -0.1 |
| C16B                      | C17B | C12B | 120.7                                        | 0.1  |
| C23B                      | C18B | C19B | 118.6                                        | -0.2 |
| C23B                      | C18B | Sn1B | 119.6                                        | 3.0  |
| C19B                      | C18B | Sn1B | 121.8                                        | -2.9 |

|      |      |      |       |      |
|------|------|------|-------|------|
| C20B | C19B | C18B | 120.9 | 0.0  |
| C21B | C20B | C19B | 120.0 | 0.0  |
| C20B | C21B | C22B | 119.8 | -0.1 |
| C23B | C22B | C21B | 120.1 | 0.2  |
| C22B | C23B | C18B | 120.7 | 0.1  |

**Table S29.** M05-2X-GD3 calculated bond lengths and differences for Compound 9”

| Calculated Bond Length (Å) |      |        | Differences in Bond Length<br>(Calc. – Exp.) |
|----------------------------|------|--------|----------------------------------------------|
| Sn1B                       | C18B | 2.1215 | 0.0018                                       |
| Sn1B                       | C12B | 2.1175 | 0.0157                                       |
| Sn1B                       | C11B | 2.1455 | -0.0034                                      |
| Sn1B                       | N1B  | 2.4512 | -0.0010                                      |
| Sn1B                       | Cl1B | 2.4351 | 0.0604                                       |
| O1B                        | C1B  | 1.3428 | -0.0031                                      |
| O1B                        | C2B  | 1.4519 | 0.0051                                       |
| N1B                        | C1B  | 1.2801 | 0.0046                                       |
| N1B                        | C3B  | 1.4798 | 0.0119                                       |
| C1B                        | C6B  | 1.4643 | 0.0044                                       |
| C2B                        | C3B  | 1.5428 | 0.0044                                       |
| C3B                        | C5B  | 1.5217 | 0.0001                                       |
| C3B                        | C4B  | 1.5313 | -0.0056                                      |
| C6B                        | C7B  | 1.3943 | -0.0053                                      |
| C6B                        | C11B | 1.4042 | -0.0024                                      |
| C7B                        | C8B  | 1.3921 | -0.0067                                      |
| C8B                        | C9B  | 1.3936 | -0.0095                                      |
| C9B                        | C10B | 1.3977 | -0.0017                                      |
| C10B                       | C11B | 1.3932 | -0.0009                                      |
| C12B                       | C17B | 1.3989 | -0.0066                                      |
| C12B                       | C13B | 1.3995 | -0.0050                                      |
| C13B                       | C14B | 1.3953 | -0.0053                                      |
| C14B                       | C15B | 1.3936 | -0.0099                                      |
| C15B                       | C16B | 1.3944 | -0.0120                                      |
| C16B                       | C17B | 1.3941 | -0.0053                                      |
| C18B                       | C23B | 1.4000 | -0.0090                                      |
| C18B                       | C19B | 1.3991 | -0.0079                                      |
| C19B                       | C20B | 1.3940 | -0.0044                                      |
| C20B                       | C21B | 1.3937 | -0.0117                                      |
| C21B                       | C22B | 1.3932 | -0.0102                                      |
| C22B                       | C23B | 1.3947 | -0.0111                                      |
| Sn1B                       | N1B  | 2.4512 | -0.0010                                      |



**Table S30.** M05-2X-GD3 calculated bond angles and differences for Compound 9”

| Calculated Bond Angle (°) |      |      | Differences in Bond Length<br>(Calc. – Exp.) |      |
|---------------------------|------|------|----------------------------------------------|------|
| C18B                      | Sn1B | C12B | 115.7                                        | 5.7  |
| C18B                      | Sn1B | C11B | 118.4                                        | -0.2 |
| C12B                      | Sn1B | C11B | 121.2                                        | -2.7 |
| C18B                      | Sn1B | N1B  | 89.2                                         | -0.2 |
| C12B                      | Sn1B | N1B  | 85.2                                         | 6.7  |
| C11B                      | Sn1B | N1B  | 74.2                                         | 1.0  |
| C18B                      | Sn1B | Cl1B | 97.8                                         | -4.7 |
| C12B                      | Sn1B | Cl1B | 97.6                                         | -2.7 |
| C11B                      | Sn1B | Cl1B | 96.5                                         | -1.0 |
| N1B                       | Sn1B | Cl1B | 170.4                                        | 0.1  |
| C1B                       | O1B  | C2B  | 105.2                                        | 0.5  |
| C1B                       | N1B  | C3B  | 107.8                                        | -0.3 |
| C1B                       | N1B  | Sn1B | 108.9                                        | -1.8 |
| C3B                       | N1B  | Sn1B | 142.7                                        | 2.0  |
| N1B                       | C1B  | O1B  | 117.1                                        | 1.0  |
| N1B                       | C1B  | C6B  | 122.7                                        | 0.3  |
| O1B                       | C1B  | C6B  | 120.1                                        | -1.4 |
| O1B                       | C2B  | C3B  | 103.9                                        | 0.7  |
| N1B                       | C3B  | C5B  | 111.4                                        | -0.8 |
| N1B                       | C3B  | C4B  | 108.9                                        | -0.3 |
| C5B                       | C3B  | C4B  | 111.2                                        | 0.2  |
| N1B                       | C3B  | C2B  | 100.9                                        | 1.0  |
| C5B                       | C3B  | C2B  | 113.0                                        | -0.2 |
| C4B                       | C3B  | C2B  | 110.9                                        | 0.1  |
| C7B                       | C6B  | C11B | 122.3                                        | -0.4 |
| C7B                       | C6B  | C1B  | 121.4                                        | -0.2 |
| C11B                      | C6B  | C1B  | 116.3                                        | 0.6  |
| C8B                       | C7B  | C6B  | 118.8                                        | 0.1  |
| C9B                       | C8B  | C7B  | 119.9                                        | 0.4  |
| C8B                       | C9B  | C10B | 120.7                                        | -0.2 |
| C11B                      | C10B | C9B  | 120.4                                        | -0.2 |
| C10B                      | C11B | C6B  | 117.9                                        | 0.2  |
| C10B                      | C11B | Sn1B | 124.2                                        | 1.1  |
| C6B                       | C11B | Sn1B | 117.8                                        | -1.3 |
| C17B                      | C12B | C13B | 118.7                                        | -0.3 |
| C17B                      | C12B | Sn1B | 121.6                                        | -1.0 |
| C13B                      | C12B | Sn1B | 119.7                                        | 1.0  |
| C14B                      | C13B | C12B | 120.8                                        | -0.1 |
| C15B                      | C14B | C13B | 119.9                                        | 0.1  |
| C16B                      | C15B | C14B | 119.8                                        | 0.1  |
| C15B                      | C16B | C17B | 120.0                                        | 0.0  |
| C16B                      | C17B | C12B | 120.8                                        | 0.1  |
| C23B                      | C18B | C19B | 118.5                                        | -0.1 |
| C23B                      | C18B | Sn1B | 119.7                                        | 3.0  |
| C19B                      | C18B | Sn1B | 121.8                                        | -2.9 |

|      |      |      |       |      |
|------|------|------|-------|------|
| C20B | C19B | C18B | 120.9 | -0.1 |
| C21B | C20B | C19B | 119.9 | 0.0  |
| C20B | C21B | C22B | 119.8 | -0.1 |
| C23B | C22B | C21B | 120.0 | 0.3  |
| C22B | C23B | C18B | 120.8 | 5.7  |

**Table S31.** B3PW91-GD3BJ calculated bond lengths and differences for Compound **10**

| Calculated Bond Length (Å) |     |        | Differences in Bond Length<br>(Calc. – Exp.) |
|----------------------------|-----|--------|----------------------------------------------|
| Sn1                        | C12 | 2.1159 | 0.0111                                       |
| Sn1                        | C1  | 2.1458 | -0.0098                                      |
| Sn1                        | N1  | 2.4008 | -0.0176                                      |
| Sn1                        | Br1 | 2.5201 | -0.0259                                      |
| Sn1                        | Br2 | 2.5876 | 0.0302                                       |
| O1A                        | C7  | 1.3400 | -0.0009                                      |
| O1A                        | C8A | 1.4518 | 0.0237                                       |
| N1                         | C7  | 1.2858 | 0.0004                                       |
| N1                         | C9  | 1.4777 | 0.0161                                       |
| C1                         | C2  | 1.3919 | -0.0084                                      |
| C1                         | C6  | 1.4073 | -0.0085                                      |
| C2                         | C3  | 1.3993 | -0.0066                                      |
| C3                         | C4  | 1.3950 | -0.0111                                      |
| C4                         | C5  | 1.3939 | -0.0080                                      |
| C5                         | C6  | 1.3966 | -0.0059                                      |
| C6                         | C7  | 1.4589 | 0.0016                                       |
| C8A                        | C9  | 1.5494 | -0.0053                                      |
| C9                         | C10 | 1.5219 | -0.0092                                      |
| C9                         | C11 | 1.5307 | -0.0105                                      |
| C12                        | C17 | 1.3990 | -0.0133                                      |
| C12                        | C13 | 1.3995 | -0.0115                                      |
| C13                        | C14 | 1.3952 | -0.0034                                      |
| C14                        | C15 | 1.3957 | -0.0113                                      |
| C15                        | C16 | 1.3954 | 0.0111                                       |
| C16                        | C17 | 1.3960 | -0.0098                                      |

**Table S32.** B3PW91-GD3BJ calculated bond angles and differences for Compound **10**

| Calculated Bond Angle (°) |     |     | Differences in Bond Length<br>(Calc. – Exp.) |      |
|---------------------------|-----|-----|----------------------------------------------|------|
| C12                       | Sn1 | C1  | 127.8                                        | -1.0 |
| C12                       | Sn1 | N1  | 85.7                                         | 4.2  |
| C1                        | Sn1 | N1  | 74.8                                         | 1.2  |
| C12                       | Sn1 | Br1 | 111.3                                        | 0.9  |
| C1                        | Sn1 | Br1 | 115.2                                        | 3.0  |
| N1                        | Sn1 | Br1 | 86.4                                         | 1.5  |
| C12                       | Sn1 | Br2 | 99.0                                         | -0.8 |
| C1                        | Sn1 | Br2 | 97.2                                         | -0.8 |
| N1                        | Sn1 | Br2 | 172.1                                        | -0.7 |
| Br1                       | Sn1 | Br2 | 97.8                                         | -5.8 |
| C7                        | O1A | C8A | 105.5                                        | -0.8 |
| C7                        | N1  | C9  | 108.4                                        | -0.3 |
| C7                        | N1  | Sn1 | 109.8                                        | -1.2 |
| C9                        | N1  | Sn1 | 141.6                                        | 1.5  |
| C2                        | C1  | C6  | 118.7                                        | 0.6  |
| C2                        | C1  | Sn1 | 124.4                                        | 0.5  |
| C6                        | C1  | Sn1 | 116.9                                        | -1.1 |
| C1                        | C2  | C3  | 120.1                                        | -0.4 |
| C4                        | C3  | C2  | 120.6                                        | -0.2 |
| C3                        | C4  | C5  | 120.1                                        | 0.5  |
| C4                        | C5  | C6  | 119.0                                        | -0.2 |
| C5                        | C6  | C1  | 121.5                                        | -0.4 |
| C5                        | C6  | C7  | 122.3                                        | -0.1 |
| C1                        | C6  | C7  | 116.2                                        | 0.5  |
| N1                        | C7  | O1A | 117.2                                        | 0.5  |
| N1                        | C7  | C6  | 122.2                                        | 0.7  |
| O1A                       | C7  | C6  | 120.6                                        | -1.4 |
| O1A                       | C8A | C9  | 104.7                                        | -0.3 |
| N1                        | C9  | C10 | 111.3                                        | -0.3 |
| N1                        | C9  | C11 | 109.1                                        | 0.2  |
| C10                       | C9  | C11 | 111.2                                        | 0.1  |
| N1                        | C9  | C8A | 101.0                                        | 0.4  |
| C10                       | C9  | C8A | 112.4                                        | -3.1 |
| C11                       | C9  | C8A | 111.4                                        | 2.7  |
| C17                       | C12 | C13 | 119.4                                        | 0.0  |
| C17                       | C12 | Sn1 | 119.9                                        | 1.5  |
| C13                       | C12 | Sn1 | 120.7                                        | -1.5 |
| C12                       | C13 | C14 | 120.3                                        | 0.2  |
| C15                       | C14 | C13 | 120.0                                        | -0.6 |
| C16                       | C15 | C14 | 119.9                                        | 0.6  |
| C15                       | C16 | C17 | 120.1                                        | -0.1 |
| C12                       | C17 | C16 | 120.3                                        | -0.1 |

**Table S33.** PBE0-GD3BJ calculated bond lengths and differences for Compound **10**

| Calculated Bond Length (Å) |     |        | Differences in Bond Length<br>(Calc. – Exp.) |
|----------------------------|-----|--------|----------------------------------------------|
| Sn1                        | C12 | 2.1280 | -0.0010                                      |
| Sn1                        | C1  | 2.1525 | -0.0165                                      |
| Sn1                        | N1  | 2.4475 | -0.0643                                      |
| Sn1                        | Br1 | 2.5244 | -0.0302                                      |
| Sn1                        | Br2 | 2.5917 | 0.0262                                       |
| O1A                        | C7  | 1.3377 | 0.0015                                       |
| O1A                        | C8A | 1.4441 | 0.0314                                       |
| N1                         | C7  | 1.2838 | 0.0023                                       |
| N1                         | C9  | 1.4778 | 0.0160                                       |
| C1                         | C2  | 1.3920 | -0.0085                                      |
| C1                         | C6  | 1.4049 | -0.0061                                      |
| C2                         | C3  | 1.3982 | -0.0055                                      |
| C3                         | C4  | 1.3935 | -0.0096                                      |
| C4                         | C5  | 1.3925 | -0.0066                                      |
| C5                         | C6  | 1.3961 | -0.0053                                      |
| C6                         | C7  | 1.4599 | 0.0006                                       |
| C8A                        | C9  | 1.5476 | -0.0036                                      |
| C9                         | C10 | 1.5223 | -0.0096                                      |
| C9                         | C11 | 1.5300 | -0.0098                                      |
| C12                        | C17 | 1.3988 | -0.0131                                      |
| C12                        | C13 | 1.3995 | -0.0115                                      |
| C13                        | C14 | 1.3947 | -0.0029                                      |
| C14                        | C15 | 1.3942 | -0.0098                                      |
| C15                        | C16 | 1.3939 | -0.0010                                      |
| C16                        | C17 | 1.3954 | -0.0165                                      |

**Table S34.** PBE0-GD3BJ calculated bond angles and differences for Compound **10**

| Calculated Bond Angle (°) |     |     | Differences in Bond Length<br>(Calc. – Exp.) |      |
|---------------------------|-----|-----|----------------------------------------------|------|
| C12                       | Sn1 | C1  | 126.9                                        | -0.2 |
| C12                       | Sn1 | N1  | 87.6                                         | 2.3  |
| C1                        | Sn1 | N1  | 74.3                                         | 1.7  |
| C12                       | Sn1 | Br1 | 111.8                                        | 0.3  |
| C1                        | Sn1 | Br1 | 116.1                                        | 2.1  |
| N1                        | Sn1 | Br1 | 86.3                                         | 1.6  |
| C12                       | Sn1 | Br2 | 98.6                                         | -0.4 |
| C1                        | Sn1 | Br2 | 97.2                                         | -0.8 |
| N1                        | Sn1 | Br2 | 171.5                                        | -0.1 |
| Br1                       | Sn1 | Br2 | 96.8                                         | -4.8 |
| C7                        | O1A | C8A | 105.6                                        | -0.8 |
| C7                        | N1  | C9  | 108.0                                        | 0.2  |
| C7                        | N1  | Sn1 | 108.9                                        | -0.3 |
| C9                        | N1  | Sn1 | 143.0                                        | 0.2  |
| C2                        | C1  | C6  | 118.6                                        | 0.7  |
| C2                        | C1  | Sn1 | 124.0                                        | 0.8  |
| C6                        | C1  | Sn1 | 117.4                                        | -1.6 |
| C1                        | C2  | C3  | 120.2                                        | -0.4 |
| C4                        | C3  | C2  | 120.6                                        | -0.2 |
| C3                        | C4  | C5  | 120.0                                        | 0.6  |
| C4                        | C5  | C6  | 119.1                                        | -0.3 |
| C5                        | C6  | C1  | 121.5                                        | -0.4 |
| C5                        | C6  | C7  | 121.8                                        | 0.4  |
| C1                        | C6  | C7  | 116.6                                        | 0.0  |
| N1                        | C7  | O1A | 117.5                                        | 0.2  |
| N1                        | C7  | C6  | 122.7                                        | 0.1  |
| O1A                       | C7  | C6  | 119.8                                        | -0.6 |
| O1A                       | C8A | C9  | 104.8                                        | -0.4 |
| N1                        | C9  | C10 | 111.7                                        | -0.7 |
| N1                        | C9  | C11 | 109.1                                        | 0.1  |
| C10                       | C9  | C11 | 111.1                                        | 0.2  |
| N1                        | C9  | C8A | 101.2                                        | 0.2  |
| C10                       | C9  | C8A | 112.0                                        | -2.6 |
| C11                       | C9  | C8A | 111.4                                        | 2.7  |
| C17                       | C12 | C13 | 119.1                                        | 0.3  |
| C17                       | C12 | Sn1 | 120.1                                        | 1.3  |
| C13                       | C12 | Sn1 | 120.7                                        | -1.6 |
| C12                       | C13 | C14 | 120.5                                        | 0.1  |
| C15                       | C14 | C13 | 120.1                                        | -0.6 |
| C16                       | C15 | C14 | 119.8                                        | 0.6  |
| C15                       | C16 | C17 | 120.1                                        | -0.2 |
| C12                       | C17 | C16 | 120.4                                        | -0.2 |

**Table S35.** M05-2X-GD3 calculated bond lengths and differences for Compound **10**

| Calculated Bond Length (Å) |     |        | Differences in Bond Length<br>(Calc. – Exp.) |
|----------------------------|-----|--------|----------------------------------------------|
| Sn1                        | C12 | 2.1099 | 0.0171                                       |
| Sn1                        | C1  | 2.1407 | -0.0047                                      |
| Sn1                        | N1  | 2.4068 | -0.0236                                      |
| Sn1                        | Br1 | 2.5205 | -0.0263                                      |
| Sn1                        | Br2 | 2.5899 | 0.0279                                       |
| O1A                        | C7  | 1.3385 | 0.0006                                       |
| O1A                        | C8A | 1.4530 | 0.0225                                       |
| N1                         | C7  | 1.2800 | 0.0061                                       |
| N1                         | C9  | 1.4805 | 0.0132                                       |
| C1                         | C2  | 1.3915 | -0.0080                                      |
| C1                         | C6  | 1.4030 | -0.0042                                      |
| C2                         | C3  | 1.3982 | -0.0056                                      |
| C3                         | C4  | 1.3930 | -0.0091                                      |
| C4                         | C5  | 1.3927 | -0.0069                                      |
| C5                         | C6  | 1.3931 | -0.0024                                      |
| C6                         | C7  | 1.4640 | -0.0035                                      |
| C8A                        | C9  | 1.5453 | -0.0012                                      |
| C9                         | C10 | 1.5219 | -0.0092                                      |
| C9                         | C11 | 1.5305 | -0.0103                                      |
| C12                        | C17 | 1.3976 | -0.0119                                      |
| C12                        | C13 | 1.3985 | -0.0106                                      |
| C13                        | C14 | 1.3939 | -0.0021                                      |
| C14                        | C15 | 1.3941 | -0.0098                                      |
| C15                        | C16 | 1.3937 | 0.0111                                       |
| C16                        | C17 | 1.3951 | -0.0098                                      |

**Table S36.** M05-2X-GD3 calculated bond angles and differences for Compound **10**

| Calculated Bond Angle (°) |     |     | Differences in Bond Length<br>(Calc. – Exp.) |      |
|---------------------------|-----|-----|----------------------------------------------|------|
| C12                       | Sn1 | C1  | 126.3                                        | 0.5  |
| C12                       | Sn1 | N1  | 86.3                                         | 3.5  |
| C1                        | Sn1 | N1  | 75.0                                         | 1.1  |
| C12                       | Sn1 | Br1 | 111.8                                        | 0.3  |
| C1                        | Sn1 | Br1 | 116.7                                        | 1.5  |
| N1                        | Sn1 | Br1 | 86.7                                         | 1.2  |
| C12                       | Sn1 | Br2 | 98.9                                         | -0.7 |
| C1                        | Sn1 | Br2 | 97.2                                         | -0.7 |
| N1                        | Sn1 | Br2 | 172.2                                        | -0.8 |
| Br1                       | Sn1 | Br2 | 96.7                                         | -4.7 |
| C7                        | O1A | C8A | 105.4                                        | -0.6 |
| C7                        | N1  | C9  | 108.1                                        | 0.1  |
| C7                        | N1  | Sn1 | 109.4                                        | -0.8 |
| C9                        | N1  | Sn1 | 142.3                                        | 0.9  |
| C2                        | C1  | C6  | 118.3                                        | 1.0  |
| C2                        | C1  | Sn1 | 124.8                                        | 0.0  |
| C6                        | C1  | Sn1 | 116.9                                        | -1.1 |
| C1                        | C2  | C3  | 120.2                                        | -0.4 |
| C4                        | C3  | C2  | 120.7                                        | -0.3 |
| C3                        | C4  | C5  | 120.0                                        | 0.6  |
| C4                        | C5  | C6  | 118.8                                        | 0.0  |
| C5                        | C6  | C1  | 122.1                                        | -1.0 |
| C5                        | C6  | C7  | 121.7                                        | 0.6  |
| C1                        | C6  | C7  | 116.2                                        | 0.4  |
| N1                        | C7  | O1A | 117.3                                        | 0.4  |
| N1                        | C7  | C6  | 122.4                                        | 0.4  |
| O1A                       | C7  | C6  | 120.3                                        | -1.0 |
| O1A                       | C8A | C9  | 104.2                                        | 0.2  |
| N1                        | C9  | C10 | 111.5                                        | -0.6 |
| N1                        | C9  | C11 | 109.1                                        | 0.1  |
| C10                       | C9  | C11 | 111.2                                        | 0.1  |
| N1                        | C9  | C8A | 100.9                                        | 0.5  |
| C10                       | C9  | C8A | 112.4                                        | -3.0 |
| C11                       | C9  | C8A | 111.2                                        | 2.9  |
| C17                       | C12 | C13 | 119.3                                        | 0.1  |
| C17                       | C12 | Sn1 | 120.3                                        | 1.1  |
| C13                       | C12 | Sn1 | 120.3                                        | -1.1 |
| C12                       | C13 | C14 | 120.4                                        | 0.1  |
| C15                       | C14 | C13 | 120.0                                        | -0.5 |
| C16                       | C15 | C14 | 119.9                                        | 0.5  |
| C15                       | C16 | C17 | 120.1                                        | -0.1 |
| C12                       | C17 | C16 | 120.3                                        | -0.1 |



**Table S37.** B3PW91-GD3BJ calculated bond lengths and differences for Compound **11**

| Calculated Bond Length (Å) |     |        | Differences in Bond Length<br>(Calc. – Exp.) |
|----------------------------|-----|--------|----------------------------------------------|
| Sn1                        | C1  | 2.1465 | -0.0202                                      |
| Sn1                        | C13 | 2.1164 | 0.0139                                       |
| Sn1                        | N1  | 2.4687 | -0.0440                                      |
| Sn1                        | Br2 | 2.5276 | -0.0109                                      |
| Sn1                        | Br1 | 2.5886 | 0.0508                                       |
| O1                         | C8  | 1.3483 | -0.0023                                      |
| O1                         | C10 | 1.4416 | -0.0059                                      |
| N1                         | C8  | 1.2932 | -0.0033                                      |
| N1                         | C9  | 1.4863 | -0.0032                                      |
| C1                         | C2  | 1.4874 | 0.0059                                       |
| C2                         | C3  | 1.4003 | -0.0110                                      |
| C2                         | C7  | 1.4148 | -0.0118                                      |
| C3                         | C4  | 1.3913 | -0.0058                                      |
| C4                         | C5  | 1.3958 | -0.0257                                      |
| C5                         | C6  | 1.3880 | -0.0087                                      |
| C6                         | C7  | 1.4038 | 0.0038                                       |
| C7                         | C8  | 1.4602 | 0.0052                                       |
| C9                         | C11 | 1.5296 | -0.0107                                      |
| C9                         | C12 | 1.5232 | -0.0039                                      |
| C9                         | C10 | 1.5422 | 0.0003                                       |
| C13                        | C18 | 1.3993 | -0.0113                                      |
| C13                        | C14 | 1.3997 | -0.0055                                      |
| C14                        | C15 | 1.3946 | -0.0077                                      |
| C15                        | C16 | 1.3961 | -0.0134                                      |
| C16                        | C17 | 1.3947 | -0.0154                                      |
| C17                        | C18 | 1.3962 | -0.0059                                      |

**Table S38.** B3PW91-GD3BJ calculated bond angles and differences for Compound **11**

| Calculated Bond Angle (°) |     |     | Differences in Bond Length<br>(Calc. – Exp.) |      |
|---------------------------|-----|-----|----------------------------------------------|------|
| C1                        | Sn1 | C13 | 122.5                                        | 14.0 |
| C1                        | Sn1 | N1  | 75.4                                         | 2.8  |
| C13                       | Sn1 | N1  | 90.5                                         | 5.0  |
| C1                        | Sn1 | Br2 | 119.0                                        | -7.6 |
| C13                       | Sn1 | Br2 | 113.7                                        | -2.9 |
| N1                        | Sn1 | Br2 | 82.6                                         | 2.1  |
| C1                        | Sn1 | Br1 | 97.5                                         | 0.5  |
| N1                        | Sn1 | Br1 | 170.7                                        | 2.2  |
| Br2                       | Sn1 | Br1 | 96.0                                         | -4.8 |
| C8                        | O1  | C10 | 106.4                                        | 0.9  |
| C8                        | N1  | C9  | 108.0                                        | 1.0  |
| C8                        | N1  | Sn1 | 117.0                                        | 0.6  |
| C9                        | N1  | Sn1 | 131.9                                        | -0.7 |
| C2                        | C1  | Sn1 | 111.4                                        | 1.0  |
| C3                        | C2  | C7  | 117.8                                        | 0.5  |
| C3                        | C2  | C1  | 119.6                                        | -0.7 |
| C7                        | C2  | C1  | 122.6                                        | 0.2  |
| C4                        | C3  | C2  | 121.6                                        | -0.3 |
| C5                        | C4  | C3  | 120.3                                        | 0.0  |
| C4                        | C5  | C6  | 119.3                                        | 0.9  |
| C5                        | C6  | C7  | 120.7                                        | -0.7 |
| C2                        | C7  | C6  | 120.4                                        | -0.4 |
| C2                        | C7  | C8  | 121.4                                        | 0.4  |
| C6                        | C7  | C8  | 118.1                                        | 0.1  |
| N1                        | C8  | O1  | 116.3                                        | -0.2 |
| N1                        | C8  | C7  | 127.5                                        | 1.0  |
| O1                        | C8  | C7  | 116.2                                        | -0.9 |
| N1                        | C9  | C11 | 108.4                                        | 1.9  |
| N1                        | C9  | C12 | 112.4                                        | -1.9 |
| C11                       | C9  | C12 | 111.2                                        | 0.7  |
| N1                        | C9  | C10 | 101.6                                        | 0.4  |
| C11                       | C9  | C10 | 111.5                                        | -0.5 |
| C12                       | C9  | C10 | 111.3                                        | -0.6 |
| O1                        | C10 | C9  | 104.4                                        | 1.1  |
| C18                       | C13 | C14 | 119.2                                        | 0.2  |
| C18                       | C13 | Sn1 | 120.6                                        | 1.9  |
| C14                       | C13 | Sn1 | 120.2                                        | -2.4 |
| C15                       | C14 | C13 | 120.3                                        | -0.2 |
| C16                       | C15 | C14 | 120.1                                        | -0.1 |
| C17                       | C16 | C15 | 119.9                                        | 0.4  |
| C16                       | C17 | C18 | 119.9                                        | 0.0  |
| C13                       | C18 | C17 | 120.5                                        | -0.3 |

**Table S39.** PBE0-GD3BJ calculated bond lengths and differences for Compound **11**

| Calculated Bond Length (Å) |     |        | Differences in Bond Length<br>(Calc. – Exp.) |
|----------------------------|-----|--------|----------------------------------------------|
| Sn1                        | C1  | 2.1475 | -0.0212                                      |
| Sn1                        | C13 | 2.1213 | 0.0091                                       |
| Sn1                        | N1  | 2.4942 | -0.0695                                      |
| Sn1                        | Br2 | 2.5257 | -0.0090                                      |
| Sn1                        | Br1 | 2.5857 | 0.0537                                       |
| O1                         | C8  | 1.3454 | 0.0006                                       |
| O1                         | C10 | 1.4364 | -0.0007                                      |
| N1                         | C8  | 1.2908 | -0.0010                                      |
| N1                         | C9  | 1.4834 | -0.0004                                      |
| C1                         | C2  | 1.4867 | 0.0066                                       |
| C2                         | C3  | 1.3994 | -0.0101                                      |
| C2                         | C7  | 1.4128 | -0.0098                                      |
| C3                         | C4  | 1.3901 | -0.0045                                      |
| C4                         | C5  | 1.3943 | -0.0241                                      |
| C5                         | C6  | 1.3870 | -0.0076                                      |
| C6                         | C7  | 1.4022 | 0.0053                                       |
| C7                         | C8  | 1.4607 | 0.0047                                       |
| C9                         | C11 | 1.5281 | -0.0092                                      |
| C9                         | C12 | 1.5216 | -0.0023                                      |
| C9                         | C10 | 1.5397 | 0.0029                                       |
| C13                        | C18 | 1.3984 | -0.0104                                      |
| C13                        | C14 | 1.3987 | -0.0045                                      |
| C14                        | C15 | 1.3935 | -0.0067                                      |
| C15                        | C16 | 1.3946 | -0.0119                                      |
| C16                        | C17 | 1.3933 | -0.0140                                      |
| C17                        | C18 | 1.3950 | -0.0048                                      |

**Table S40.** PBE0-GD3BJ calculated bond angles and differences for Compound **11**

| Calculated Bond Angle (°) |     |     | Differences in Bond Length<br>(Calc. – Exp.) |      |
|---------------------------|-----|-----|----------------------------------------------|------|
| C1                        | Sn1 | C13 | 122.0                                        | 14.5 |
| C1                        | Sn1 | N1  | 75.0                                         | 3.2  |
| C13                       | Sn1 | N1  | 90.4                                         | 5.0  |
| C1                        | Sn1 | Br2 | 119.6                                        | -8.2 |
| C13                       | Sn1 | Br2 | 113.5                                        | -2.7 |
| N1                        | Sn1 | Br2 | 82.8                                         | 1.8  |
| C1                        | Sn1 | Br1 | 97.5                                         | 0.5  |
| N1                        | Sn1 | Br1 | 170.4                                        | 2.5  |
| Br2                       | Sn1 | Br1 | 96.0                                         | -4.9 |
| C8                        | O1  | C10 | 106.3                                        | 1.0  |
| C8                        | N1  | C9  | 107.7                                        | 1.2  |
| C8                        | N1  | Sn1 | 117.2                                        | 0.4  |
| C9                        | N1  | Sn1 | 132.4                                        | -1.1 |
| C2                        | C1  | Sn1 | 112.1                                        | 0.2  |
| C3                        | C2  | C7  | 117.7                                        | 0.5  |
| C3                        | C2  | C1  | 119.6                                        | -0.6 |
| C7                        | C2  | C1  | 122.7                                        | 0.1  |
| C4                        | C3  | C2  | 121.6                                        | -0.3 |
| C5                        | C4  | C3  | 120.3                                        | 0.0  |
| C4                        | C5  | C6  | 119.3                                        | 1.0  |
| C5                        | C6  | C7  | 120.7                                        | -0.7 |
| C2                        | C7  | C6  | 120.4                                        | -0.5 |
| C2                        | C7  | C8  | 121.5                                        | 0.3  |
| C6                        | C7  | C8  | 118.0                                        | 0.2  |
| N1                        | C8  | O1  | 116.4                                        | -0.3 |
| N1                        | C8  | C7  | 127.6                                        | 0.9  |
| O1                        | C8  | C7  | 116.0                                        | -0.6 |
| N1                        | C9  | C11 | 108.5                                        | 1.8  |
| N1                        | C9  | C12 | 112.5                                        | -1.9 |
| C11                       | C9  | C12 | 111.1                                        | 0.7  |
| N1                        | C9  | C10 | 101.7                                        | 0.3  |
| C11                       | C9  | C10 | 111.4                                        | -0.4 |
| C12                       | C9  | C10 | 111.3                                        | -0.6 |
| O1                        | C10 | C9  | 104.4                                        | 1.2  |
| C18                       | C13 | C14 | 119.1                                        | 0.2  |
| C18                       | C13 | Sn1 | 120.5                                        | 2.0  |
| C14                       | C13 | Sn1 | 120.3                                        | -2.5 |
| C15                       | C14 | C13 | 120.4                                        | -0.2 |
| C16                       | C15 | C14 | 120.1                                        | -0.1 |
| C17                       | C16 | C15 | 119.9                                        | 0.4  |
| C16                       | C17 | C18 | 119.9                                        | 0.0  |
| C13                       | C18 | C17 | 120.5                                        | -0.3 |

**Table S41.** M05-2X-GD3 calculated bond lengths and differences for Compound **11**

| Calculated Bond Length (Å) |     |        | Differences in Bond Length<br>(Calc. – Exp.) |
|----------------------------|-----|--------|----------------------------------------------|
| Sn1                        | C1  | 2.1369 | -0.0106                                      |
| Sn1                        | C13 | 2.1086 | 0.0218                                       |
| Sn1                        | N1  | 2.4863 | -0.0616                                      |
| Sn1                        | Br2 | 2.5292 | -0.0125                                      |
| Sn1                        | Br1 | 2.5892 | 0.0502                                       |
| O1                         | C8  | 1.3480 | -0.0020                                      |
| O1                         | C10 | 1.4432 | -0.0074                                      |
| N1                         | C8  | 1.2884 | 0.0015                                       |
| N1                         | C9  | 1.4899 | -0.0068                                      |
| C1                         | C2  | 1.4920 | 0.0013                                       |
| C2                         | C3  | 1.3990 | -0.0097                                      |
| C2                         | C7  | 1.4102 | -0.0072                                      |
| C3                         | C4  | 1.3897 | -0.0042                                      |
| C4                         | C5  | 1.3941 | -0.0240                                      |
| C5                         | C6  | 1.3867 | -0.0073                                      |
| C6                         | C7  | 1.4014 | 0.0061                                       |
| C7                         | C8  | 1.4659 | -0.0005                                      |
| C9                         | C11 | 1.5299 | -0.0110                                      |
| C9                         | C12 | 1.5234 | -0.0040                                      |
| C9                         | C10 | 1.5356 | 0.0069                                       |
| C13                        | C18 | 1.3976 | -0.0097                                      |
| C13                        | C14 | 1.3980 | -0.0038                                      |
| C14                        | C15 | 1.3935 | -0.0066                                      |
| C15                        | C16 | 1.3946 | -0.0119                                      |
| C16                        | C17 | 1.3934 | -0.0140                                      |
| C17                        | C18 | 1.3949 | -0.0046                                      |

**Table S42.** M05-2X-GD3 calculated bond angles and differences for Compound **11**

| Calculated Bond Angle (°) |     |     | Differences in Bond Length<br>(Calc. – Exp.) |      |
|---------------------------|-----|-----|----------------------------------------------|------|
| C1                        | Sn1 | C13 | 122.2                                        | 14.4 |
| C1                        | Sn1 | N1  | 75.5                                         | 2.8  |
| C13                       | Sn1 | N1  | 90.1                                         | 5.4  |
| C1                        | Sn1 | Br2 | 119.7                                        | -8.4 |
| C13                       | Sn1 | Br2 | 113.3                                        | -2.6 |
| N1                        | Sn1 | Br2 | 83.1                                         | 1.6  |
| C1                        | Sn1 | Br1 | 97.6                                         | 0.4  |
| N1                        | Sn1 | Br1 | 170.8                                        | 2.1  |
| Br2                       | Sn1 | Br1 | 95.4                                         | -4.2 |
| C8                        | O1  | C10 | 106.0                                        | 1.4  |
| C8                        | N1  | C9  | 107.4                                        | 1.5  |
| C8                        | N1  | Sn1 | 116.1                                        | 1.5  |
| C9                        | N1  | Sn1 | 132.9                                        | -1.7 |
| C2                        | C1  | Sn1 | 111.7                                        | 0.7  |
| C3                        | C2  | C7  | 117.7                                        | 0.5  |
| C3                        | C2  | C1  | 119.4                                        | -0.5 |
| C7                        | C2  | C1  | 122.9                                        | -0.1 |
| C4                        | C3  | C2  | 121.5                                        | -0.2 |
| C5                        | C4  | C3  | 120.3                                        | -0.1 |
| C4                        | C5  | C6  | 119.3                                        | 1.0  |
| C5                        | C6  | C7  | 120.6                                        | -0.6 |
| C2                        | C7  | C6  | 120.6                                        | -0.6 |
| C2                        | C7  | C8  | 121.5                                        | 0.3  |
| C6                        | C7  | C8  | 117.8                                        | 0.4  |
| N1                        | C8  | O1  | 116.3                                        | -0.1 |
| N1                        | C8  | C7  | 127.8                                        | 0.7  |
| O1                        | C8  | C7  | 115.9                                        | -0.5 |
| N1                        | C9  | C11 | 108.4                                        | 1.9  |
| N1                        | C9  | C12 | 113.1                                        | -2.6 |
| C11                       | C9  | C12 | 111.2                                        | 0.6  |
| N1                        | C9  | C10 | 101.4                                        | 0.6  |
| C11                       | C9  | C10 | 111.0                                        | 0.1  |
| C12                       | C9  | C10 | 111.4                                        | -0.7 |
| O1                        | C10 | C9  | 103.7                                        | 1.9  |
| C18                       | C13 | C14 | 119.2                                        | 0.2  |
| C18                       | C13 | Sn1 | 120.5                                        | 2.0  |
| C14                       | C13 | Sn1 | 120.3                                        | -2.5 |
| C15                       | C14 | C13 | 120.3                                        | -0.2 |
| C16                       | C15 | C14 | 120.1                                        | -0.1 |
| C17                       | C16 | C15 | 120.0                                        | 0.3  |
| C16                       | C17 | C18 | 119.8                                        | 0.1  |
| C13                       | C18 | C17 | 120.5                                        | -0.3 |
